# Supplementary material for: A shortened interval between vaccinations with the trivalent inactivated influenza vaccine increases responsiveness in the aged
Source: Aging (Albany NY). 2015 Dec 3;7(12):1077–85. doi: 10.18632/aging.100852 (PMC4712333; doi:10.18632/aging.100852)
Supplement: Supplementary file 1 [file aging-07-1077-s001.xlsx]

## Sheet: GENES
								222-020	222-017	222-012	222-011	222-021	222-019	222-010	222-013	222-006	222-007	222-004	222-005	222-009	222-003	222-031	222-032	222-033	222-034	222-035	222-036	222-037	222-038	222-039	222-040	222-041	222-042	222-043	222-044	222-045	222-046	222-049	Patient ID
								67	74	76	73	73	67	76	65	77	79	76	87	76	69	80	76	78	73	76	69	75	77	73	85	82	77	81	80	82	80	75	Age
								F	F	M	F	F	F	F	M	F	F	M	F	F	F	F	F	M	M	F	F	M	F	M	F	M	M	F	F	M	F	M	Gender
								C	AA	C	C	C	C	C	C	C	C	C	C	C	C	C	C	C	C	C	C	C	C	C	C	C	C	C	C	C	C	C	Race
								1	1	1	1	1	1	1	1	1	1	1	1	1	1	2	2	2	2	2	2	2	2	2	2	2	2	2	2	2	2	2	cohort
								6.64474	7.07237	7.33553	7.59868	7.59868	7.86184	8.02632	8.02632	8.25658	8.25658	8.45395	8.75	8.94737	9.01316	reg	reg	reg	reg	reg	reg	reg	reg	reg	reg	reg	reg	reg	reg	reg	reg	reg	Re-vacc time
								40	5	5	80	40	5	5	5	20	40	5	5	5	40	40	5	80	40	5	5	80	5	5	5	5	20	320	20	20	5	40	d0	H1N1	titer
								80	80	80	160	160	1280	80	40	320	320	40	80	160	160	40	40	640	80	0	20	80	160	40	20	320	40	320	80	20	20	80	d7
								160	160	160	160	320	2560	160	40	640	320	80	320	320	320	40	0	320	80	0	20	160	160	80	40	320	80	320	160	40	20	160	d14
								160	160	80	80	40	320	20	40	20	80	5	80	5	40	160	5	160	320	40	20	5	640	40	160	5	320	40	80	80	40	640	d0	H3N2
								640	320	320	160	160	640	80	160	80	320	80	160	320	320	160	640	320	320	80	80	40	1280	160	320	5	160	40	320	40	20	640	d7
								640	640	320	160	160	1280	320	160	160	320	160	160	160	640	320	640	320	640	320	80	40	640	320	160	40	160	160	640	80	40	640	d14
								2	16	16	2	4	256	16	8	16	8	8	16	32	4	1	8	8	2	0	4	1	32	8	4	64	2	1	4	1	4	2	d7	H1N1	response
								4	32	32	2	8	512	32	8	32	8	16	64	64	8	1	0	4	2	0	4	2	32	16	8	64	4	1	8	2	4	4	d14
ILMN probe	Accession	Description	Symbol	cohort 1/cohort 2				4	2	4	2	4	2	4	4	4	4	16	2	64	8	1	128	2	1	2	4	8	2	4	2	1	0.5	1	4	0.5	0.5	1	d7	H3N2
				pv	fold	FDR		4	4	4	2	4	4	16	4	8	4	32	2	32	16	2	128	2	2	8	4	8	1	8	1	8	0.5	4	8	1	1	1	d14
ILMN_1657722	NM_001006	ribosomal protein S3A (RPS3A), mRNA.	RPS3A	0.00555619	1.63842	0.13879		-1.00769	-0.488032	0.562272	-0.805772	0.408598	0.356924	0.493721	0.545591	1.09393	1.78102	1.48256	0.597042	0.706903	-0.0667728	0.645392	-0.38059	-1.15792	-0.527698	0.0676437	0.273303	0.000742787	-0.118922	-1.00655	-0.945576	-0.204801	-0.467746	-0.3289	-0.408673	-0.626164	-0.693586	0.644132
ILMN_3290497	XR_016732	PREDICTED: misc_RNA (LOC643863), miscRNA.	LOC643863	0.00459899	1.61199	0.135711		-1.10091	-0.484594	0.774763	-0.47321	0.199994	-0.271006	0.616835	0.188052	0.884089	1.54799	1.83404	0.643156	0.616835	0.398339	0.371205	-0.557251	-0.868235	-0.646962	0.0071726	0.178039	-0.279633	-0.0941651	-0.688446	-0.335769	-0.128181	-0.873774	-0.211925	-0.213665	-0.6832	-0.740365	0.580866
ILMN_2383097	NM_001035006	ribosomal protein L17 (RPL17), transcript variant 2, mRNA.	RPL17	0.00722199	1.60162	0.144651		-1.10201	-0.30451	0.921674	-0.664305	0.134786	-0.159311	0.57777	-0.028317	0.78667	1.75984	1.74945	0.568666	0.748804	0.395637	0.46096	-0.577251	-0.956248	-0.533327	0.0731771	0.211919	-0.0637995	0.000867158	-0.68663	-0.240035	-0.299821	-0.938556	-0.235688	-0.162793	-0.722779	-0.914586	0.571239
ILMN_3245403	XM_001713654	PREDICTED: hypothetical protein LOC100133931 (LOC100133931), mRNA.	LOC100133931	0.00771973	1.59745	0.147524		-1.1162	-0.501322	0.723992	-0.629117	0.13801	-0.222033	0.447015	0.109661	0.925218	1.88707	1.79668	0.517123	0.868271	0.340056	0.465724	-0.475554	-1.00038	-0.710189	-0.159696	0.223566	-0.229003	-0.0322783	-0.689474	-0.323702	-0.208408	-0.894887	-0.266952	-0.184025	-0.545724	-0.534039	0.493761
ILMN_1770020	NM_130906	peptidylprolyl isomerase (cyclophilin)-like 3 (PPIL3), transcript variant PPIL3b, mRNA.	PPIL3	3.7369e-05	1.46366	0.0419519		-0.345745	0.242605	0.66834	-0.195433	0.121542	0.148521	0.428118	0.423301	0.365997	0.950564	0.91069	0.209937	0.17584	0.0903014	-0.0779198	-0.398648	-0.498343	-0.176662	-0.0651428	-0.460647	-0.140713	-0.0672041	-0.370343	-0.441935	-0.197293	-0.954866	0.21783	-0.180376	-0.309909	-0.0725096	-0.0547245
ILMN_1703679	NM_000569	Fc fragment of IgG, low affinity IIIa, receptor (CD16a) (FCGR3A), transcript variant 1, mRNA.	FCGR3A	0.00769686	1.44656	0.147524		0.303604	0.705661	0.49778	0.586735	-0.268203	0.376003	0.867125	0.158497	-0.209387	-0.130315	0.0237254	1.06713	0.146685	0.169617	-0.45582	0.355818	0.170426	-0.969097	0.674825	-0.0574768	-0.587605	0.0760396	-0.169221	0.176296	-0.99636	0.458901	-0.439392	-0.0581055	0.142666	-0.564382	-1.59726
ILMN_2318725	NM_001037663	eukaryotic translation elongation factor 1 beta 2 (EEF1B2), transcript variant 3, mRNA.	EEF1B2	0.00204906	1.4212	0.118502		-0.239264	0.123237	0.238596	-0.403718	0.173972	0.087313	0.123029	0.18142	0.647534	1.4464	1.10059	0.375278	0.269548	-0.290477	0.303144	0.0573348	-0.437384	-0.506841	-0.13435	0.128009	0.197859	-0.308464	-0.331433	-0.461701	-0.214855	-0.86462	-0.348247	-0.290125	-0.679102	-0.223137	0.148003
ILMN_1817609	BM679134	UI-E-EO0-ahy-o-19-0-UI.s1 UI-E-EO0 cDNA clone UI-E-EO0-ahy-o-19-0-UI 3, mRNA sequence	NaN	0.00432411	1.41162	0.134766		0.530987	0.975066	0.107161	0.19555	-0.278421	0.496276	0.695714	0.14584	-0.141686	-0.0454698	0.0699621	1.00513	0.118394	0.0745507	-0.171363	0.448063	-0.0247093	-0.799647	0.563465	-0.0291072	-0.495742	0.126754	-0.288482	0.0039065	-0.954886	0.339422	-0.596529	-0.198959	0.0789056	-0.567223	-1.0935
ILMN_1675852	XM_937285	PREDICTED: similar to Proteasome subunit alpha type 6 (Proteasome iota chain) (Macropain iota chain) (Multicatalytic endopeptidase complex iota chain) (LOC650518), mRNA.	LOC650518	0.00388848	1.39995	0.131475		-0.416353	-0.10089	0.47251	-0.255955	0.181467	-0.0387883	0.452645	0.0699827	0.538836	1.24326	1.3452	0.205406	0.258942	-0.33512	0.287496	-0.398609	-0.422979	-0.304856	0.250551	0.0858711	0.247938	-0.0851791	-0.600486	-0.763417	-0.29802	-0.428919	-0.261151	-0.289937	-0.298374	-0.661127	0.0869635
ILMN_1719224	NM_152350	chromosome 17 open reading frame 45 (C17orf45), mRNA.	C17orf45	6.53168e-05	1.39971	0.0419519		-0.467233	-0.063114	0.343411	0.0602784	0.0231962	0.0810115	0.108287	0.302218	0.311089	0.825832	0.928636	0.431991	0.680796	0.196153	-0.0405668	-0.239695	-0.389472	-0.163075	-0.0785877	0.0151657	-0.284562	-0.0900854	-0.44868	-0.714745	-0.201439	-0.452027	-0.0101811	-0.206447	-0.318006	-0.0566906	0.000699343
ILMN_1812191	NM_138425	chromosome 12 open reading frame 57 (C12orf57), mRNA.	C12orf57	0.000221477	1.39522	0.0718438		-0.150658	-0.128385	0.481309	0.00465047	0.044128	0.186261	0.797551	0.246509	0.301277	1.06109	0.235018	0.24015	0.242569	-0.0196674	-0.019359	0.114035	-0.435005	-0.39992	-0.235902	-0.16279	-0.177962	0.00786153	-0.506186	-0.833415	-0.0716773	-0.7372	-0.0418675	-0.0952467	-0.463572	-0.0692402	0.259748
ILMN_1907467	DB336496	DB336496 TESTI2 cDNA clone TESTI2007437 3, mRNA sequence	NaN	0.00315864	1.38363	0.124909		0.36824	0.597445	0.560166	0.325135	-0.0875789	0.407717	0.711915	0.00411127	-0.0612079	-0.155116	0.287435	0.710923	0.108196	-0.0758916	-0.16175	0.341573	0.0381661	-0.701292	0.434963	-0.206195	-0.503117	0.182584	-0.176218	0.0329704	-0.939193	0.401009	-0.613282	-0.00344732	0.125625	-0.67118	-1.0504
ILMN_1739257	NM_001568	eukaryotic translation initiation factor 3, subunit E (EIF3E), mRNA.	EIF3E	0.00488824	1.38211	0.135711		-0.754412	0.022185	0.251634	-0.000311857	0.354283	-0.191257	-0.0513939	0.460058	0.572066	0.948374	1.40877	0.0356859	0.223835	0.240241	0.28142	-0.0695063	-0.957152	-0.443567	-0.123577	0.0977138	0.0890164	-0.662632	-0.533435	-0.180009	-0.352847	-0.400718	0.128048	-0.045077	-0.507715	-0.10134	0.118548
ILMN_2145518	NM_018480	transmembrane protein 126B (TMEM126B), mRNA.	TMEM126B	0.00515696	1.38073	0.136472		-0.252706	-0.100081	0.713815	-0.336413	0.126511	0.0664901	0.21008	0.235371	0.36587	0.782382	1.45274	0.0759834	0.513328	-0.381061	0.381029	-0.159455	-0.442836	-0.14261	0.177687	0.225256	0.237679	-0.131024	-0.763428	-0.619031	-0.513498	-0.57578	-0.0625758	-0.294379	-0.444497	-0.666195	0.0976087
ILMN_3246360	XM_001713658	PREDICTED: hypothetical protein LOC100130553 (LOC100130553), mRNA.	LOC100130553	0.00358768	1.37679	0.129842		-0.539522	0.188429	0.834593	-0.0937313	0.255634	-0.163432	0.422571	0.2608	0.555669	0.908286	0.532884	0.117612	0.587784	-0.381274	0.380012	0.155822	-0.334278	-0.132147	0.0671266	0.48287	-0.172097	0.0738878	-0.398027	-0.636756	-0.558596	-0.711689	-0.188857	-0.453007	-0.696496	-0.604213	0.117612
ILMN_2076600	NM_004867	integral membrane protein 2A (ITM2A), mRNA.	ITM2A	0.000545699	1.37557	0.0848223		-0.23728	0.639069	0.229863	0.0650681	0.349285	-0.271567	0.237781	0.392045	0.204078	0.909105	-0.00510865	0.0253154	0.507402	0.185064	0.401593	-0.0239871	-0.616668	-0.226312	-0.0233853	0.0130232	-0.743944	-0.348705	-0.116371	-0.177595	-0.08475	-0.846472	0.0423569	-0.00206516	-0.661476	-0.0441924	-0.43934
ILMN_3296979	XR_042419	PREDICTED: misc_RNA (LOC730187), miscRNA.	LOC730187	0.00187667	1.37124	0.116861		-0.427204	-0.0348341	0.595886	-0.361314	0.0662291	-0.0448149	0.39378	-0.0788202	0.449456	1.15215	0.905819	0.133409	0.588832	0.226903	0.114465	-0.306752	-0.718944	-0.528049	-0.148998	0.0484234	-0.104709	0.0507511	-0.382264	-0.62511	0.290887	-0.187815	-0.228493	-0.310015	-0.334549	-0.22047	0.1779
ILMN_1737297	XM_925906	PREDICTED: similar to solute carrier family 22 member 4 (LOC642377), mRNA.	LOC642377	0.0071666	1.35616	0.144562		0.327591	0.653832	0.3966	0.346722	-0.265645	0.412049	0.699064	0.0485266	0.073407	-0.118779	0.0996269	0.924355	-0.0724037	-0.0592259	-0.336047	0.421527	0.126558	-0.660554	0.379832	-0.270239	-0.54754	0.263618	-0.254714	0.288682	-0.833254	0.255647	-0.37997	-0.272107	0.294926	-0.61481	-1.12523
ILMN_1656791	NM_001010	ribosomal protein S6 (RPS6), mRNA.	RPS6	0.000710456	1.35459	0.0932123		-0.187291	0.544067	0.393162	0.277652	0.13527	0.204261	-0.129206	0.00764373	-0.0662606	0.722585	0.639201	0.0120255	0.504498	0.108966	0.355911	0.0872853	-0.406696	-0.382956	-0.173214	0.0389291	-0.01879	-0.114491	-0.395745	-0.874948	0.0991478	-0.720102	-0.0777993	-0.343921	-0.546679	-0.408497	0.284118
ILMN_2103547	NM_001023567	golgi autoantigen, golgin subfamily a, 8B (GOLGA8B), mRNA.	GOLGA8B	0.000673351	1.34614	0.0927045		-0.108494	-0.291414	0.5902	0.402427	0.134192	0.358593	-0.0135934	0.0904193	0.372229	1.05365	0.395716	-0.0150229	0.321786	-0.26847	0.00821767	0.0301294	-0.482086	-0.0341241	0.1073	-0.16945	-0.129335	-0.417632	-0.31815	0.0383543	-0.0638737	-0.867789	-0.330186	-0.250704	-0.412689	-0.466608	0.138374
ILMN_1665761	NM_138576	B-cell CLL/lymphoma 11B (zinc finger protein) (BCL11B), transcript variant 1, mRNA.	BCL11B	0.00181167	1.33758	0.116861		-0.0552736	0.323769	0.525475	0.197119	0.235149	0.30589	0.010131	0.532576	0.0494366	0.610847	-0.275101	0.0801239	0.481379	-0.144514	0.328534	0.477578	-0.279655	-0.108017	-0.109824	-0.106996	-0.260476	-0.164886	-0.318147	-0.300909	-0.773074	-1.19859	0.010131	-0.079894	-0.57804	-0.123799	-0.0541436
ILMN_3240586	NM_178836	phospholipase D family, member 6 (PLD6), mRNA.	PLD6	0.00136214	1.33748	0.108553		-0.042698	0.384933	-0.334053	0.660385	0.122635	0.566926	0.949463	0.240433	0.164108	0.206046	0.0327914	0.175607	0.228053	-0.277875	0.263868	0.0885916	-0.137188	0.0644002	0.443563	-0.097067	-0.396005	0.00779856	-0.414459	-0.784178	-0.314295	-0.671248	-0.424639	-0.328417	-0.266463	-0.189012	-0.24103
ILMN_1812666	NM_013238	DnaJ (Hsp40) homolog, subfamily C, member 15 (DNAJC15), mRNA.	DNAJC15	0.00284792	1.33336	0.124909		-0.383282	-0.120856	0.442895	-0.087728	0.215559	0.145996	0.0637812	0.100565	0.400158	0.890522	0.957596	0.257168	0.403174	-0.221348	0.0560125	-0.477716	-0.178327	-0.178084	0.0792958	-0.0677123	0.0169952	-1.07613	-0.343687	-0.525727	0.156372	-0.318991	-0.143937	0.173683	-0.519502	-0.12442	0.136648
ILMN_1697469	NM_006275	splicing factor, arginine/serine-rich 6 (SFRS6), mRNA.	SFRS6	0.00045734	1.33075	0.0832933		-0.212141	0.0212125	0.401503	0.08129	0.0539149	0.574252	0.0212125	0.326505	0.185673	0.641757	0.793792	0.0522664	0.421899	-0.3154	-0.0663084	-0.115214	-0.466778	-0.131487	0.0269564	0.39747	0.112226	-0.324332	-0.498922	-0.503885	-0.0946565	-0.44752	-0.223434	-0.177934	-0.54211	-0.316756	0.0654309
ILMN_1654151	NM_004374	cytochrome c oxidase subunit VIc (COX6C), mRNA.	COX6C	0.00197921	1.32579	0.118502		-0.216031	-0.0132366	0.281899	-0.18054	-0.198842	-0.0725508	0.376341	-0.0530931	0.471104	1.21294	0.978637	0.50174	0.223104	-0.242844	-0.0773185	-0.11953	-0.160509	-0.32982	-0.0766467	-0.0126743	-0.0627416	-0.0609372	-0.589307	-0.315866	-0.225786	-0.147299	-0.226478	0.0375319	-0.37009	-0.470356	0.0174811
ILMN_1664912	NM_004512	interleukin 11 receptor, alpha (IL11RA), transcript variant 1, mRNA.	IL11RA	0.00470117	1.31377	0.135711		-0.108464	0.903747	-0.0281495	0.448214	0.283606	0.402089	0.220941	0.465281	0.245878	0.178229	-0.501618	0.395586	0.0625013	-0.116111	0.471732	0.252228	0.0821965	0.190608	0.115183	-0.0533917	-0.073705	-0.152528	-0.665767	-0.566935	-0.27566	-1.0009	-0.289772	-0.160382	-0.579682	-0.360883	-0.162649
ILMN_1689172	XM_292512	PREDICTED: brother of ataxin-1 (BOAT), mRNA.	BOAT	0.00589472	1.31036	0.13879		0.331456	0.185073	0.399152	-0.00388682	-0.242127	0.492111	1.11582	-0.184833	-0.237356	0.208246	0.296583	0.664965	0.163956	0.0548911	0.336495	0.0302859	0.26184	-0.701935	-0.0417024	0.0302859	-0.0374305	0.621597	-0.158957	-0.376994	-0.436036	-0.73558	-0.480841	-0.205819	-0.28296	-0.161918	-0.350557
ILMN_3244117	NM_015894	stathmin-like 3 (STMN3), mRNA.	STMN3	0.00369265	1.30467	0.131239		-0.0364219	0.628729	0.145097	0.305242	-0.0511752	0.36904	0.365155	0.46628	0.291519	0.478609	-0.286944	0.0843003	0.291519	-0.431721	0.398451	0.0129931	-0.447153	0.145097	-0.0594127	0.0483605	-0.377444	0.14968	-0.462282	-0.452683	-0.215094	-1.11676	-0.166443	-0.0354071	-0.557345	0.156048	-0.362851
ILMN_1805345	NM_001040097	motile sperm domain containing 3 (MOSPD3), transcript variant 2, mRNA.	MOSPD3	0.000131564	1.30064	0.0533047		0.202489	0.436117	0.494549	0.308709	-0.102307	0.18702	0.465892	-0.026543	-0.0110823	0.139669	0.0756868	0.6884	0.0701067	0.0513444	-0.125476	-0.056134	-0.065931	-0.444364	0.027675	-0.190571	-0.194738	-0.0376181	-0.19924	0.280486	-0.621291	0.130638	-0.222619	-0.248635	0.00497753	-0.19955	-0.665695
ILMN_2241775	NM_001042369	TROVE domain family, member 2 (TROVE2), transcript variant 1, mRNA.	TROVE2	0.00135475	1.29966	0.108553		-0.285449	-0.261593	0.612333	-0.14292	0.215114	0.23733	0.190841	0.409971	0.121004	0.493432	0.965037	0.0785846	0.445308	-0.208491	0.101482	-0.00629312	-0.484873	-0.348251	-0.00695084	0.235008	0.0692445	-0.152289	-0.507639	-0.313165	-0.332422	-0.199405	0.0213861	-0.320123	-0.313205	-0.42758	0.0423948
ILMN_1778173	NM_016282	adenylate kinase 3 (AK3), nuclear gene encoding mitochondrial protein, mRNA.	AK3	0.000288981	1.29734	0.072806		-0.245836	0.0285649	0.566675	-0.0956837	0.0579136	0.198143	0.208082	0.34569	0.165944	0.450695	0.728088	0.18796	0.271065	-0.127782	0.0327578	-0.290738	-0.543818	-0.225852	0.169735	0.256641	-0.364393	-0.257561	-0.537648	-0.505919	0.000537156	-0.27509	-0.185824	0.0397876	-0.252545	-0.0601504	-0.057751
ILMN_1744147	NM_005760	CCAAT/enhancer binding protein (C/EBP), zeta (CEBPZ), mRNA.	CEBPZ	0.00536085	1.29206	0.13802		-0.390703	0.0664349	0.245767	-0.0145615	0.137041	0.217435	-0.00524182	0.172842	0.242081	0.931217	1.1222	0.0088588	0.432322	-0.351903	0.191001	-0.214057	-0.355783	-0.278611	0.108565	0.0329331	0.0621947	-0.250567	-0.450332	0.150178	-0.289052	-0.590725	-0.24806	-0.00279843	-0.533701	-0.421515	0.222648
ILMN_1669927	NM_012092	inducible T-cell co-stimulator (ICOS), mRNA.	ICOS	0.000306671	1.29165	0.072806		0.00372917	0.0641829	0.16751	0.168932	0.18498	0.319418	0.0231273	0.144646	0.32105	0.489869	0.423994	0.0151988	0.310609	0.0112632	0.551656	-0.114463	-0.604744	-0.137097	0.164464	-0.0296313	-0.188072	-0.104231	-0.579962	-0.409592	-0.543039	-0.533439	0.053982	0.0653833	-0.309763	-0.182859	-0.159265
ILMN_1709880	NM_001002	ribosomal protein, large, P0 (RPLP0), transcript variant 1, mRNA.	RPLP0	0.00276919	1.29155	0.124734		-0.0418458	0.403517	0.405655	0.0990529	0.199905	0.467892	0.0574079	0.342052	0.015802	0.394709	0.631221	0.0481239	0.182908	-0.401936	0.417522	0.203757	-0.352611	-0.204759	0.111259	0.402504	0.0701357	-0.223633	-0.605444	-0.881254	-0.548624	-0.390086	-0.142547	-0.209486	-0.166164	-0.334701	-0.0151648
ILMN_1684943	NM_016388	T cell receptor associated transmembrane adaptor 1 (TRAT1), mRNA.	TRAT1	0.00490539	1.29053	0.135711		-0.639982	0.205678	0.438004	0.0794006	0.405235	0.0970553	-0.161463	-0.0281353	0.304023	0.535179	0.762117	0.18034	0.405987	0.152717	0.386148	-0.0193026	-0.615703	-0.40451	0.070626	0.0638523	-0.279086	-0.271166	-0.815248	0.0579116	-0.580056	-0.22926	0.317007	0.0407896	-0.451752	-0.209358	0.00612865
ILMN_3298167	NM_001042697	zinc finger, SWIM-type containing 7 (ZSWIM7), transcript variant 1, mRNA.	ZSWIM7	0.000572695	1.28755	0.0848223		0.0510108	0.370761	0.159473	-0.0108197	-0.214989	0.107533	0.380543	0.420123	-0.167131	0.496894	0.401916	0.040094	0.537389	0.0260734	-0.0686776	-0.154955	-0.232793	-0.11521	-0.631582	0.318027	0.0450186	-0.449307	-0.22818	-0.394021	-0.539451	-0.0825758	-0.352462	-0.149516	-0.384212	0.0101338	0.366775
ILMN_1697024	XM_001125680	PREDICTED: similar to serine/threonine/tyrosine interacting protein, transcript variant 1 (LOC730432), mRNA.	LOC730432	0.00185753	1.28523	0.116861		-0.253651	0.097016	0.562626	0.218922	0.161197	0.231542	0.0392573	0.252793	0.190258	0.49531	0.866385	0.0114649	0.175909	-0.337029	0.113582	-0.0751474	-0.669527	-0.170007	0.312657	0.262798	-0.234801	-0.181522	-0.540396	-0.190225	-0.386238	-0.244791	-0.0641391	-0.0536642	-0.52621	-0.371799	0.158105
ILMN_1713143	NM_007208	mitochondrial ribosomal protein L3 (MRPL3), nuclear gene encoding mitochondrial protein, mRNA.	MRPL3	0.00583511	1.28504	0.13879		-0.371877	0.0570695	0.273301	-0.380371	0.2043	-0.0631688	0.201928	0.0280516	0.427448	0.796171	1.11777	0.0261818	0.299188	0.0587265	0.295732	0.0188144	-0.575784	-0.598082	0.107073	0.161891	0.0647436	-0.505433	-0.287944	-0.171048	-0.206305	-0.414137	-0.0136183	-0.0549604	-0.29582	-0.444655	0.0165772
ILMN_1662839	NM_001001974	pleckstrin homology domain containing, family A (phosphoinositide binding specific) member 1 (PLEKHA1), transcript variant 2, mRNA.	PLEKHA1	0.00572947	1.27745	0.13879		-0.049709	0.191289	0.444593	-0.164054	0.379455	0.178345	0.0160558	0.540321	-0.0268774	0.281235	0.854065	-0.0647148	0.33819	-0.328982	0.206828	0.0387555	-0.396944	-0.206244	0.204982	0.281235	-0.0530423	-0.108245	-0.37075	-0.412841	-0.524426	-1.00566	-0.0988941	-0.052076	-0.531787	-0.0397568	0.207438
ILMN_1690392	NM_012071	COMM domain containing 3 (COMMD3), mRNA.	COMMD3	0.00628987	1.2773	0.140468		-0.283936	-0.0857291	0.453854	-0.378117	-0.00237251	-0.0540166	0.215963	0.101534	0.331957	1.10368	0.978162	0.109911	0.326869	-0.0975671	0.209793	-0.0646116	-0.283936	-0.214575	0.0600404	0.239387	0.0293473	-0.0636581	-0.26734	-0.528538	-0.321538	-0.142484	-0.192377	-0.278618	-0.321793	-0.558518	-0.000119576
ILMN_2154566	NM_007104	ribosomal protein L10a (RPL10A), mRNA.	RPL10A	0.000551034	1.27517	0.0848223		-0.173697	0.247311	0.472091	0.237186	0.0807465	0.616269	0.0503289	0.347543	0.151465	0.343967	0.0339652	-0.127975	0.097247	0.131288	0.138572	-0.0355755	-0.227894	-0.158888	-0.347425	0.181138	-0.177128	-0.218604	-0.240697	-0.124806	0.0147958	-0.856596	-0.0550187	-0.160901	-0.728765	0.0472376	0.0339652
ILMN_1656662	XR_015917	PREDICTED: similar to ribosomal protein L24 (LOC731365), mRNA.	LOC731365	0.00483808	1.27442	0.135711		-0.231615	0.170964	0.431335	-0.275176	0.183133	0.0763082	0.297753	-0.0150382	0.168149	1.14177	0.588572	-0.0308661	0.202957	-0.0330371	0.32331	0.0364679	-0.601536	-0.487769	-0.077356	0.026585	-0.077356	0.00767154	-0.273164	-0.671004	0.1823	-0.243253	-0.385193	-0.118947	-0.327005	-0.189257	0.176723
ILMN_1673138	NM_006777	zinc finger and BTB domain containing 33 (ZBTB33), mRNA.	ZBTB33	0.00233736	1.27423	0.118516		-0.312191	-0.0659228	0.595007	0.0142657	0.195981	0.148061	-0.00357669	0.323969	0.181328	0.579699	0.927249	-0.0659228	0.271128	-0.192234	0.160842	-0.0142402	-0.576042	-0.421154	-0.259444	0.243286	0.172287	-0.333243	-0.523313	-0.289895	-0.154528	-0.0782153	0.101341	-0.124233	-0.369355	-0.248047	-0.0762921
ILMN_1897160	AW264336	xq98e07.x1 NCI_CGAP_Brn53 cDNA clone IMAGE:2758692 3, mRNA sequence	NaN	0.00464473	1.27324	0.135711		0.331091	0.538651	0.332948	0.117936	-0.270339	0.255858	0.719413	-0.107772	-0.00613076	0.0529464	0.0995622	0.756984	-0.05793	-0.0471732	-0.167476	0.350027	0.231062	-0.400301	0.221705	0.0550047	-0.369532	-0.0272525	-0.234118	-0.093594	-0.6578	0.323503	-0.500377	-0.301298	-0.0323924	-0.477252	-0.546505
ILMN_1791097	NM_018364	round spermatid basic protein 1 (RSBN1), mRNA.	RSBN1	0.00133475	1.27305	0.108553		-0.193287	-0.0443465	0.395028	-0.0228815	0.277352	0.0142335	0.018557	0.312458	0.304106	0.381041	0.977321	0.0223938	0.408662	-0.129946	0.21351	-0.26649	-0.546081	-0.0910935	0.0595116	0.0598942	0.0603163	-0.181109	-0.454592	-0.45658	0.0146964	-0.163255	0.0785065	-0.234145	-0.426974	-0.400433	0.117056
ILMN_1788237	XM_942384	PREDICTED: similar to Baculoviral IAP repeat-containing protein 1 (Neuronal apoptosis inhibitory protein) (LOC652755), mRNA.	LOC652755	0.00473389	1.27144	0.135711		0.295708	0.0159717	0.539583	0.116101	-0.189763	0.366905	-0.413855	1.0798	-0.0592871	0.130828	0.105414	0.725022	-0.0038173	-0.0691731	-0.210731	-0.136051	-0.275053	0.0136227	-0.239424	0.105441	-0.242555	-0.572919	-0.484427	-0.300405	0.276091	-0.399602	-0.363997	-0.0367452	0.0556035	0.145999	-0.0196705
ILMN_1778836	NM_001031684	splicing factor, arginine/serine-rich 7, 35kDa (SFRS7), mRNA.	SFRS7	0.00400916	1.27083	0.13243		-0.238673	-0.0607967	0.496108	-0.0147558	0.422263	0.0425384	0.191449	-0.0394607	0.230115	0.31909	0.940276	-0.162756	0.500573	-0.049493	0.137375	-0.227798	-0.393107	-0.48554	0.119761	0.361574	0.0917993	-0.567741	-0.352669	-0.254799	-0.0770799	-0.534516	-0.0234329	-0.049493	-0.507429	-0.239419	0.253041
ILMN_2168217	NM_004951	Epstein-Barr virus induced gene 2 (lymphocyte-specific G protein-coupled receptor) (EBI2), mRNA.	EBI2	0.00390914	1.27033	0.131475		-0.517856	0.306836	-0.242276	0.145326	0.221852	0.155314	0.0821215	0.107592	0.326065	0.598553	0.755093	0.172315	0.232355	0.334108	0.512646	0.0238083	-0.559495	-0.331859	0.348114	0.106359	-0.213899	-0.458834	-0.332779	-0.369328	-0.253412	-0.192712	0.0184485	0.00961977	-0.582403	-0.288659	-0.0529473
ILMN_1789244	NM_014587	SRY (sex determining region Y)-box 8 (SOX8), mRNA.	SOX8	0.000257929	1.26549	0.0718438		0.0081504	0.219952	-0.179225	0.375715	0.147456	0.610589	0.0223101	0.360351	0.316998	0.502218	-0.300078	0.545944	0.00715449	-0.0953175	0.0574658	0.136948	-0.343755	-0.232071	-0.0313231	-0.0591346	-0.290105	-0.102523	-0.381154	-0.302903	-0.414043	0.09278	-0.245088	-0.196191	-0.0696656	-0.0728456	-0.23432
ILMN_1882495	AI271016	qw67g08.x1 NCI_CGAP_Ov33 cDNA clone IMAGE:1996190 3, mRNA sequence	NaN	0.00154753	1.26503	0.115137		0.162955	0.237351	0.356886	0.108423	0.0451985	0.268726	-0.266366	-0.0281518	0.323113	0.697081	0.424579	-0.0407177	0.331533	-0.237145	0.357478	0.160054	-0.17964	-0.0951658	-0.30911	-0.199925	-0.303978	-0.427389	-0.281523	-0.215423	-0.328429	-0.79447	0.0603037	-0.0472889	-0.420165	0.171577	-0.0187024
ILMN_1797698	NM_006047	RNA binding motif protein 12 (RBM12), transcript variant 1, mRNA.	RBM12	0.00105831	1.26337	0.100197		-0.149106	-0.0500087	0.398991	-0.13332	0.183541	0.101571	0.113704	0.224841	0.180637	0.527846	0.970751	0.0263241	0.32631	-0.0854747	0.191064	-0.118708	-0.595419	-0.035007	0.140312	0.0174191	0.0946085	-0.216743	-0.148299	-0.466524	-0.0729612	-0.231328	-0.0423223	-0.287412	-0.39964	-0.280365	-0.0807885
ILMN_3248443	NR_002599	small nucleolar RNA host gene 6 (non-protein coding) (SNHG6), non-coding RNA.	SNHG6	0.000689147	1.25797	0.093072		-0.293251	0.27736	0.472201	0.116374	-0.0446045	0.144917	0.306026	0.312789	0.260501	0.513793	0.441762	0.143477	0.111599	-0.431026	0.0104313	-0.0410286	-0.26371	-0.144147	-0.106383	0.298611	-0.0377338	-0.298093	-0.306814	-0.503412	-0.0289269	-0.545762	-0.0795676	0.00610105	-0.425069	-0.233856	-0.0977762
ILMN_2160388	NM_000986	ribosomal protein L24 (RPL24), mRNA.	RPL24	0.00728158	1.25702	0.145365		-0.314514	0.209067	0.267831	-0.571503	0.0415057	0.12687	0.392777	0.178909	0.181893	1.05078	0.6552	0.0690113	0.475888	-0.273046	0.156663	-0.0642842	-0.567525	-0.310031	-0.120971	0.0662983	-0.183604	0.0593639	-0.36167	-0.551102	-0.122398	-0.0413635	-0.224903	-0.122531	-0.288347	-0.0591804	0.149742
ILMN_1683888	NM_006947	signal recognition particle 72kDa (SRP72), mRNA.	SRP72	0.000119464	1.25693	0.0498259		-0.150444	0.195553	0.249422	0.160534	0.079423	0.103115	0.285004	0.250405	0.0695862	0.434752	0.61076	0.00230281	0.266321	-0.143856	0.0851354	-0.093575	-0.31448	-0.0659185	0.0197062	0.283391	-0.044443	-0.356748	-0.217453	-0.494233	-0.166961	-0.474264	-0.0923036	-0.277026	-0.336267	-0.160168	0.0270789
ILMN_2201533	NM_152766	chromosome 17 open reading frame 61 (C17orf61), mRNA.	C17orf61	0.00360625	1.25677	0.129842		-0.132658	-0.233539	0.40449	-0.134297	0.00663743	0.21128	0.303995	-0.00962011	0.370221	0.887352	0.728191	0.12594	0.190969	-0.211478	-0.174872	-0.173158	-0.116125	-0.224269	0.00949472	0.301485	0.129892	0.138101	-0.353481	-0.522437	0.0869113	-0.395546	-0.308062	-0.425184	-0.447383	-0.120507	0.0346687
ILMN_1752591	NM_015344	leptin receptor overlapping transcript-like 1 (LEPROTL1), mRNA.	LEPROTL1	0.00569901	1.2546	0.13879		-0.0593822	-0.0106866	0.305359	0.00541404	0.435832	0.30128	-0.138187	0.273057	0.156354	0.340632	0.494982	-0.141175	0.593348	-0.174266	0.336418	0.166595	-0.639676	-0.144379	0.236946	-0.133884	-0.214101	-0.366167	-0.596134	-0.520948	-0.473442	-0.140879	0.0899118	0.0585505	-0.470762	-0.316868	0.459073
ILMN_1679617	XM_940103	PREDICTED: similar to HLA class II histocompatibility antigen, DR-W53 beta chain precursor (LOC654155), mRNA.	LOC654155	0.00766712	1.25426	0.147417		0.181568	0.63879	0.145477	-0.0905645	-0.00754353	0.386088	0.472741	-0.248496	-0.120674	0.206039	0.180192	0.879934	-0.0474594	0.0097232	-0.19485	0.262755	0.138419	-0.469744	0.363404	-0.0693307	-0.332757	0.0472076	0.0537107	0.0185672	-0.648312	0.190064	-0.200959	-0.313164	-0.0425169	-0.549755	-0.66898
ILMN_1756360	NM_000996	ribosomal protein L35a (RPL35A), mRNA.	RPL35A	0.00811138	1.25377	0.14926		-0.132684	0.124824	0.569203	-0.340158	-0.0142262	0.0787959	0.51275	-0.0516904	0.168542	0.88163	0.617111	0.261323	0.175188	-0.375007	0.159626	0.00355415	-0.424112	-0.367061	0.136762	0.178695	-0.257935	0.0651868	-0.543191	-0.691163	-0.27428	0.000432313	-0.378193	-0.0813906	0.0951544	-0.302737	0.140178
ILMN_1768958	NM_005739	RAS guanyl releasing protein 1 (calcium and DAG-regulated) (RASGRP1), mRNA.	RASGRP1	0.00651734	1.25205	0.1411		-0.0763208	0.301275	0.797391	0.0394237	0.269303	0.457727	0.0887756	0.481399	0.024544	0.148648	0.265271	-0.179074	0.137866	-0.449691	0.32667	0.201927	-0.474618	-0.208084	-0.157177	-0.0306277	-0.0714483	-0.239119	-0.466762	-0.438564	-0.556296	-0.685469	-0.0689031	-0.0101847	-0.206671	-0.0626782	0.435897
ILMN_1903568	AK022936	cDNA FLJ12874 fis, clone NT2RP2003769	NaN	0.00314097	1.25094	0.124909		-0.341631	-0.227578	-0.0378714	0.0480212	0.303682	0.235585	0.352693	0.341559	0.377598	0.379359	0.741125	0.0027237	0.39854	-0.144379	-0.0296799	0.0456277	-0.483192	0.0468708	0.0780516	0.370203	-0.116074	-0.500715	-0.438013	-0.478434	-0.440115	0.073305	-0.0860232	-0.296661	-0.313408	-0.0293	0.0562912
ILMN_1699160	NM_005546	IL2-inducible T-cell kinase (ITK), mRNA.	ITK	0.00773999	1.24949	0.147524		-0.380824	0.323542	0.617664	0.143194	0.324455	0.132236	0.113958	0.213399	0.023579	0.398028	0.15093	0.0340108	0.195645	-0.303623	0.257497	0.139981	-0.515661	-0.24521	0.233215	0.0410975	-0.161393	-0.208418	-0.285902	-0.0031846	-0.541263	-1.16624	0.0652494	-0.0895683	-0.436504	-0.121441	-0.0131714
ILMN_1797813	NM_015355	suppressor of zeste 12 homolog (Drosophila) (SUZ12), mRNA.	SUZ12	0.0044683	1.24863	0.135711		-0.298919	-0.224944	0.532149	0.0103412	0.0133764	-0.161154	0.115748	0.306448	0.320735	0.667074	0.832199	0.170153	0.288832	-0.103198	0.167054	-0.163883	-0.640548	0.0155383	0.215061	0.147183	0.0276516	-0.0711052	-0.374064	-0.402667	-0.297821	-0.167438	0.0294741	-0.239734	-0.117094	-0.48322	-0.0923802
ILMN_3201453	XR_016912	PREDICTED: misc_RNA (LOC644363), miscRNA.	LOC644363	0.00312773	1.24478	0.124909		0.0239875	0.0456424	0.445379	-0.0365452	0.533758	0.163899	-0.0831561	0.151014	0.116716	0.201476	0.853468	-0.0255205	0.0381239	-0.0111212	0.468152	0.103911	-0.50048	-0.249828	0.103911	-0.254511	-0.0758299	-0.40918	-0.268915	-0.20445	-0.332852	-0.281016	0.16481	-0.347402	-0.279456	-0.39088	0.318992
ILMN_1694671	NM_182491	zinc finger, AN1-type domain 2A (ZFAND2A), mRNA.	ZFAND2A	0.00365068	1.24373	0.130073		0.157448	-0.00785052	-0.0545698	-0.0198864	-0.122807	0.630697	0.160821	-0.263513	0.253593	0.756182	0.432769	0.379406	0.298657	-0.191951	-0.288397	-0.11249	0.413273	0.153163	-0.0429568	0.0531649	-0.0612328	-0.486648	-0.468961	-0.524966	-0.341715	0.0342218	-0.321143	0.0548451	-0.161289	-0.189409	-0.133749
ILMN_1789436	NM_019049	chromosome 1 open reading frame 218 (C1orf218), mRNA.	C1orf218	0.00378677	1.2432	0.131475		0.00014041	0.0339007	0.71967	0.0525845	0.0434265	0.0702947	0.0310568	0.405941	0.0942177	0.523244	0.813997	0.0300688	-0.119894	-0.451312	0.0841922	-0.234187	-0.137797	0.00436815	-0.0339831	0.0383873	-0.00458599	0.259908	-0.30253	-0.228693	-0.559976	-0.0247647	-0.171674	-0.236644	-0.179283	-0.47419	-0.408675
ILMN_1714599	NM_001745	calcium modulating ligand (CAMLG), mRNA.	CAMLG	1.89522e-05	1.24287	0.0383935		0.123593	0.0655209	0.214587	0.0751065	0.138392	0.208157	0.348848	0.0726012	0.143882	0.405375	0.544861	0.243487	0.00576059	-0.256662	0.106458	-0.178575	-0.343547	-0.182044	-0.0434933	0.138392	-0.182824	-0.206862	-0.267348	-0.167497	-0.447769	-0.0263897	-0.0463517	-0.0646809	-0.256029	-0.23686	-0.0934943
ILMN_1703330	NM_020177	fem-1 homolog c (C. elegans) (FEM1C), mRNA.	FEM1C	0.00317102	1.24252	0.124909		-0.0643531	-0.305215	0.234086	0.134303	0.106569	-0.183587	0.0795307	0.418094	0.287828	0.242778	1.07712	0.164758	0.285703	-0.0525937	0.0497629	-0.345652	-0.405077	0.035799	0.043558	0.0501618	0.0203792	-0.112259	-0.378388	-0.349985	-0.344639	0.152407	-0.111898	-0.155581	-0.139842	-0.518418	0.128687
ILMN_1728710	NM_001031665	zinc finger protein 816A (ZNF816A), mRNA.	ZNF816A	0.00225043	1.24197	0.118516		-0.322447	-0.0325806	0.223853	0.0355577	0.1164	0.0289371	0.0473854	0.124642	0.58451	0.632929	0.708337	0.144486	0.207659	-0.189663	0.0904432	-0.20855	-0.528533	-0.365356	0.107194	0.192992	0.106429	-0.293079	-0.237127	-0.137715	-0.0467362	-0.343275	-0.215728	-0.325071	-0.30263	-0.23342	0.23052
ILMN_1754234	NM_006624	zinc finger, MYND domain containing 11 (ZMYND11), transcript variant 1, mRNA.	ZMYND11	0.00656538	1.24135	0.141258		-0.374628	0.112296	0.612805	0.0973389	0.213163	-0.164311	0.103795	0.0703115	0.185188	0.718123	1.04044	-0.0375856	0.120972	-0.320275	0.248107	0.0436234	-0.259648	-0.196129	-0.171766	0.0629007	-0.244311	-0.196129	-0.372785	-0.0756461	-0.149656	-0.262778	-0.00479008	-0.0632688	-0.568863	-0.171144	-0.0330269
ILMN_1683817	NM_173469	ubiquitin-conjugating enzyme E2Q family member 2 (UBE2Q2), mRNA.	UBE2Q2	0.00229484	1.23614	0.118516		-0.0948722	0.0456142	0.315554	0.150605	0.216863	0.272845	0.0259947	0.511586	-0.0064512	0.319849	0.678712	-0.0833076	0.329223	-0.344393	-0.0361761	0.153645	-0.65421	-0.263878	0.284277	0.167636	-0.18753	-0.368084	-0.304624	-0.148381	-0.233182	-0.215604	0.112809	-0.169871	-0.383039	-0.222444	0.108074
ILMN_1678004	NM_015012	transmembrane protein 41B (TMEM41B), mRNA.	TMEM41B	0.00234786	1.23273	0.118516		0.00465936	-0.0451499	0.216562	-0.0892496	0.0298773	0.439117	0.0391805	0.180784	0.154091	0.37046	0.779558	0.0308103	0.267102	-0.0169226	0.054055	-0.122866	-0.244224	-0.1587	0.420289	0.156408	-0.0823266	-0.378281	-0.199179	-0.569396	-0.058948	-0.301955	-0.0423907	-0.368463	-0.169407	-0.486837	0.287435
ILMN_1666739	NM_022768	RNA binding motif protein 15 (RBM15), mRNA.	RBM15	0.00137024	1.232	0.108553		-0.267969	0.0214565	0.508482	0.0479491	0.0792975	0.361659	-0.257809	0.185709	0.191299	0.287124	0.796395	-0.00250336	0.274724	0.0674203	0.121156	-0.165957	-0.467292	0.0524656	-0.084558	0.0917913	0.0374013	-0.374759	-0.437198	-0.234901	-0.101038	-0.232283	-0.047375	-0.326958	-0.188585	-0.0968009	0.122579
ILMN_1699208	NM_139207	nucleosome assembly protein 1-like 1 (NAP1L1), transcript variant 1, mRNA.	NAP1L1	0.00496325	1.23102	0.135711		-0.447213	-0.0986351	0.0310649	-0.0583611	0.160048	0.0817753	0.0872098	0.403125	0.221914	0.578705	0.674052	0.129111	0.272781	0.0777521	0.205856	-0.193594	-0.533945	-0.238148	-0.0953736	0.342531	-0.0919143	-0.242238	-0.53658	-0.215699	-0.289755	-0.0817997	0.249252	-0.177164	-0.607144	-0.0666388	0.0409822
ILMN_1714700	NM_021643	tribbles homolog 2 (Drosophila) (TRIB2), mRNA.	TRIB2	0.00303097	1.22854	0.124909		-0.176387	0.490484	0.462618	0.306403	0.126551	0.52571	-0.172845	0.0943615	-0.0991678	0.543238	-0.0750028	-0.147234	0.0515695	0.0353604	0.233216	-0.16884	-0.664986	-0.306555	0.042506	-0.268151	-0.0482255	-0.0191059	-0.148328	0.125558	-0.355702	-0.533534	0.0943414	-0.00917659	-0.35947	-0.156935	-0.117824
ILMN_1689665	NM_001018160	NEDD8 activating enzyme E1 subunit 1 (NAE1), transcript variant 3, mRNA.	NAE1	0.000334265	1.22805	0.0740641		-0.227679	0.0136082	0.199586	-0.0541359	0.11547	0.135864	0.201135	0.059284	0.366746	0.66694	0.327299	0.13565	0.253257	-0.0159568	0.0451688	-0.00912477	-0.272011	-0.402869	-0.00751392	0.263568	-0.218998	-0.176951	-0.283716	-0.363624	-0.380449	-0.259699	-0.117218	0.0835476	-0.221618	-0.167573	0.0943884
ILMN_1677607	NM_006918	sterol-C5-desaturase (ERG3 delta-5-desaturase homolog, S. cerevisiae)-like (SC5DL), transcript variant 1, mRNA.	SC5DL	0.000575795	1.22696	0.0848223		-0.106597	-0.14958	0.302808	0.124053	0.24713	0.122691	-0.0500728	-0.0981967	0.194139	0.362006	0.869046	0.172446	0.269722	0.0496523	0.109034	-0.0658066	-0.144649	-0.15214	0.0601583	0.0582884	0.0460853	-0.0850353	-0.393016	-0.340434	-0.170389	-0.045379	-0.200449	-0.114283	-0.482828	-0.171673	-0.119865
ILMN_3266482	XR_038602	PREDICTED: misc_RNA (LOC100129158), miscRNA.	LOC100129158	0.00542127	1.22555	0.13802		-0.208669	0.25007	0.20768	-0.235848	-0.0617006	0.20768	0.164583	0.225758	0.0369138	0.721296	0.734688	0.148305	0.137954	-0.140793	0.231917	-0.0445916	-0.298169	-0.250354	-0.00683626	0.259597	-0.153034	-0.225156	-0.208669	-0.13931	-0.0919536	-0.686464	-0.0821341	-0.103025	-0.628052	-0.0617006	0.156323
ILMN_1661306	XM_928197	PREDICTED: similar to 60S ribosomal protein L29 (Cell surface heparin binding protein HIP), transcript variant 1 (LOC643433), mRNA.	LOC643433	0.00104898	1.22397	0.100197		-0.131739	0.445751	0.318328	0.0546195	0.0475738	0.389912	0.0616059	0.159347	0.00625534	0.577926	0.0746205	0.265422	-0.0394432	-0.143319	0.00945143	0.0616059	-0.302146	-0.476726	-0.0356358	0.323113	-0.0969473	-0.114305	-0.2741	-0.550559	-0.171645	-0.261926	-0.014167	-0.134021	-0.447913	0.0328814	0.0304706
ILMN_2397231	NM_006447	ubiquitin specific peptidase 16 (USP16), transcript variant 1, mRNA.	USP16	0.00551483	1.22236	0.13879		-0.12802	-0.0765708	0.260444	-0.151769	0.134695	0.0606548	-0.0356642	0.207176	0.230832	0.342184	1.17578	0.12652	0.130675	-0.0143693	0.201743	-0.280287	-0.381123	-0.226969	-0.201401	0.182484	-0.0720956	-0.272101	-0.414029	-0.148746	-0.312582	-0.251144	0.173466	-0.0818271	-0.00210065	-0.259817	0.16956
ILMN_1702301	NM_014689	dedicator of cytokinesis 10 (DOCK10), mRNA.	DOCK10	0.00830667	1.22214	0.149977		0.0137232	0.66675	0.492097	0.230858	0.498977	0.208488	-0.0249872	0.221125	-0.104607	-0.0843038	0.0984219	-0.108341	0.164566	-0.327266	0.304365	0.332494	-0.209803	-0.314241	0.0257201	0.161258	-0.40159	-0.299607	-0.174223	-0.0911839	0.163257	-0.747303	-0.21862	-0.271998	-0.556237	-0.057023	-0.202801
ILMN_2391765	NM_001040437	chromosome 6 open reading frame 48 (C6orf48), transcript variant 1, mRNA.	C6orf48	0.00431766	1.22135	0.134766		-0.497247	0.0636009	0.283879	0.265681	0.0143785	0.40493	0.166326	0.0127359	0.203067	0.596519	0.237619	0.120272	0.184013	-0.0313208	-0.00615585	-0.00295584	-0.571927	-0.195202	-0.14766	0.0568307	-0.32856	-0.196468	-0.344502	-0.652584	-0.0499597	-0.32856	0.169463	0.0364462	-0.348835	0.35147	0.113269
ILMN_1782237	XM_946266	PREDICTED: G protein-coupled receptor 109B, transcript variant 3 (GPR109B), mRNA.	GPR109B	0.00349171	1.22097	0.128564		0.0495656	0.46797	0.163732	0.117808	-0.168247	0.198152	0.442195	0.0240474	-0.0594354	-0.0499609	0.147826	0.830715	-0.102732	0.212672	-0.410081	0.130675	0.0268126	-0.466107	0.086402	-0.262023	-0.192846	0.0768919	0.0867936	0.126097	-0.502276	-0.000217737	-0.228312	-0.0616123	0.169191	-0.241577	-0.472525
ILMN_1690352	NM_032804	2-aminoethanethiol (cysteamine) dioxygenase (ADO), mRNA.	ADO	0.00505553	1.22041	0.135711		0.0560905	-0.0167464	0.120374	0.124427	0.129704	-0.0193507	0.223782	0.160805	0.146804	0.406844	1.0094	-0.118039	0.313882	-0.449701	0.115269	-0.0889805	-0.151703	-0.147837	-0.192018	0.352663	-0.185579	-0.177609	-0.444008	-0.120062	-0.319691	-0.156871	-0.074507	-0.341715	-0.275026	-0.342061	0.200332
ILMN_1684594	NM_015306	ubiquitin specific peptidase 24 (USP24), mRNA.	USP24	0.000575042	1.21981	0.0848223		-0.109026	0.0558264	0.418075	0.0438777	-0.229352	0.150307	-0.0291439	0.292181	0.318561	0.585575	0.375106	0.144586	0.00660096	0.0601104	-0.133111	-0.237294	-0.133884	-0.233524	0.0979533	0.0574756	0.00406606	-0.14181	-0.317351	-0.529879	-0.0616438	-0.360804	0.102141	0.135913	-0.135307	-0.0731564	-0.383224
ILMN_1710326	NM_001040181	claudin domain containing 1 (CLDND1), transcript variant 1, mRNA.	CLDND1	0.00650002	1.21963	0.1411		-0.429491	0.236799	0.399301	-0.189297	0.307857	0.0766827	0.146132	0.0856434	0.0484512	0.356972	0.976786	0.0221993	0.293479	-0.00889158	0.274709	-0.0417992	-0.432221	-0.179265	0.0784716	0.12727	-0.028316	-0.243363	-0.286275	-0.255719	-0.12787	-0.38058	-0.0944481	-0.126284	-0.201855	-0.425816	0.294188
ILMN_1806778	NM_182666	ubiquitin-conjugating enzyme E2E 1 (UBC4/5 homolog, yeast) (UBE2E1), transcript variant 2, mRNA.	UBE2E1	0.00665511	1.21959	0.14159		-0.10561	-0.257395	0.194451	-0.303413	0.10683	0.239524	0.04671	0.354015	0.191525	0.685161	0.914747	0.00527741	0.283059	-0.253541	0.0833683	-0.13217	-0.350404	-0.154607	0.0128711	0.218232	0.051588	-0.102812	-0.413894	-0.305803	-0.417678	-0.0988936	0.0311353	-0.274952	-0.333287	-0.0533669	-0.0764388
ILMN_3225784	XM_001724848	PREDICTED: similar to hCG1997137, transcript variant 3 (LOC730029), mRNA.	LOC730029	0.00599496	1.21956	0.139626		-0.27195	0.391737	0.480738	-0.195242	0.00319784	0.185681	0.0437978	0.165721	0.308169	0.780651	0.327004	0.0466068	-0.135505	0.0888925	0.293028	-0.0156908	-0.528581	-0.437343	-0.160548	-0.0706707	-0.0617134	-0.135505	-0.280809	-0.48468	0.19025	-0.487146	-0.00366804	0.0704243	-0.260705	0.0119075	0.188499
ILMN_1789999	NM_133496	solute carrier family 30 (zinc transporter), member 7 (SLC30A7), mRNA.	SLC30A7	0.000726954	1.21929	0.0932123		0.0358195	-0.0421889	0.331271	0.0203675	-0.0048705	0.513425	-0.0446248	0.368895	-0.0168279	0.553718	0.54099	0.0398633	-0.0638715	-0.220198	0.0319295	-0.0448604	-0.111599	-0.156172	-0.0937325	-0.00613659	0.0210039	-0.135084	-0.312763	-0.312763	-0.0346873	-0.494091	-0.126342	0.0313125	-0.329095	-0.0201877	-0.326533
ILMN_3181695	XR_038380	PREDICTED: misc_RNA (LOC100130178), miscRNA.	LOC100130178	0.00558053	1.21716	0.13879		0.125934	-0.229684	-0.0363875	-0.0932356	0.266477	0.0713773	0.341686	-0.263647	0.169131	0.832148	0.706011	0.106964	0.36891	-0.105095	-0.0696071	-0.290945	-0.225543	-0.142794	0.274694	-0.000495198	-0.0705987	-0.161121	-0.251112	-0.150626	0.0418667	-0.687558	0.00589724	-0.166993	-0.034588	-0.191931	0.0466264
ILMN_1798076	NM_006898	homeobox D3 (HOXD3), mRNA.	HOXD3	0.00668476	1.21683	0.141696		0.189878	0.362068	0.193747	0.118107	-0.274789	0.262859	0.59039	-0.026775	0.106237	-0.194523	0.111172	0.686702	0.107227	0.00763427	-0.336392	0.21228	0.00753738	-0.353379	0.191468	0.0242828	-0.496283	0.0959186	-0.0908366	0.13079	-0.451104	0.337873	-0.444102	-0.213168	-0.0504365	-0.141953	-0.515751
ILMN_3279277	XR_041075	PREDICTED: misc_RNA (LOC387930), miscRNA.	LOC387930	0.00452784	1.21621	0.135711		-0.474733	-0.0559288	0.412376	0.106112	0.00096613	-0.0203724	0.226636	0.0918586	0.213434	0.7042	0.358987	0.133826	0.17711	0.17711	0.0585961	-0.218425	-0.248726	-0.160204	-0.302796	0.0157503	0.106112	-0.285837	-0.165595	-0.384118	0.109624	-0.725309	0.0147116	-0.223093	-0.302796	0.135671	0.267
ILMN_1754990	XM_940693	PREDICTED: similar to ubiquitin and ribosomal protein S27a precursor (LOC388720), mRNA.	LOC388720	0.00711623	1.21224	0.14434		-0.208423	0.18384	0.31579	-0.338847	0.18384	0.203646	0.156367	0.117811	0.133034	0.615977	0.73384	0.138054	0.128269	-0.250412	0.306388	-0.0252732	-0.284962	-0.277678	0.0256166	0.196859	0.138054	-0.0546311	-0.37499	-0.362598	-0.0446923	-0.48394	-0.168938	-0.15873	-0.53513	-0.15873	0.108452
ILMN_3240824	XM_001720419	PREDICTED: similar to heparan sulfate 6-O-sulfotransferase 3 (LOC100134314), mRNA.	LOC100134314	0.00763871	1.21091	0.147309		0.172533	0.47117	0.201622	-0.159861	-0.183449	0.283511	0.607106	0.0285907	-0.0278345	-0.199719	0.0374272	0.56936	-0.0747756	0.396987	-0.095084	0.0959154	0.0505871	-0.40553	0.4285	0.0240656	-0.30526	0.105315	-0.247183	0.167201	-0.603757	-0.112494	-0.256275	-0.00876677	-0.25126	-0.308306	-0.393614
ILMN_1808939	NM_001010	ribosomal protein S6 (RPS6), mRNA.	RPS6	0.00478319	1.21084	0.135711		-0.353959	0.0695837	0.156561	0.0342897	0.158114	0.085881	0.2228	0.143679	0.0962787	0.614092	0.460882	-0.0764549	0.184418	0.318998	0.085881	-0.0800579	-0.737781	-0.543921	-0.224128	0.0504081	0.0934114	0.00743652	-0.21375	-0.0892472	-0.0378823	-0.422281	-0.00924404	0.085881	-0.411499	0.272572	0.0504081
ILMN_2229242	NM_014463	LSM3 homolog, U6 small nuclear RNA associated (S. cerevisiae) (LSM3), mRNA.	LSM3	0.00693803	1.21028	0.142795		0.080232	-0.123419	0.0616462	-0.178937	0.0986733	-0.144327	0.175069	-0.185588	0.0487952	0.740554	1.13235	0.285999	0.213217	0.0139497	-0.0243146	-0.255921	0.0469393	-0.087896	-0.14196	-0.143306	-0.0123183	-0.143171	-0.328509	-0.218845	0.0391839	-0.0828743	-0.269194	-0.134628	-0.109808	-0.229088	0.108507
ILMN_3183065	XM_001722756	PREDICTED: hypothetical protein LOC100128714 (LOC100128714), mRNA.	LOC100128714	0.00811525	1.21021	0.14926		0.14171	0.279745	0.28999	0.0354672	-0.065987	0.104311	0.504184	0.0986658	-0.0651909	0.101528	0.0473119	0.948386	-0.08629	-0.094331	-0.335536	0.262957	-0.0871208	-0.328221	0.349853	0.0714342	-0.362565	0.0754533	-0.224778	0.0675312	-0.4672	0.211203	-0.208682	-0.157644	-0.0163214	-0.402709	-0.407541
ILMN_1769409	NM_033428	chromosome 9 open reading frame 123 (C9orf123), mRNA.	C9orf123	0.00669752	1.20883	0.141754		-0.133675	-0.0741631	0.206362	-0.0169695	0.192171	0.215248	0.119248	0.145237	0.0215193	0.870111	0.33101	-0.045397	0.429162	-0.189492	0.164331	-0.156979	-0.344396	-0.0647293	0.17169	0.226151	0.0510177	-0.629256	-0.312668	-0.508911	-0.120762	-0.334568	0.000749455	0.064359	-0.328804	-0.0605375	0.0459004
ILMN_1690494	NM_001024662	ribosomal protein L6 (RPL6), transcript variant 1, mRNA.	RPL6	0.00566826	1.20769	0.13879		-0.436814	0.137843	0.277356	-0.0878632	0.028837	0.256774	-0.00827749	0.197723	0.261605	0.613661	0.556961	0.160287	0.108812	-0.0541167	0.241067	-0.227954	-0.456151	-0.397863	-0.0153966	0.241067	-0.0333993	-0.0842892	-0.227954	-0.113647	0.0352491	-0.636167	-0.0365375	-0.110411	-0.428028	-0.0365375	0.102799
ILMN_1669599	NM_017925	DENN/MADD domain containing 4C (DENND4C), mRNA.	DENND4C	0.000417025	1.20752	0.0830069		-0.0372894	-0.09283	0.288269	0.0284256	-0.0755852	0.180194	0.502063	0.238964	0.152488	0.517589	0.0588486	0.207745	0.0663275	0.0683983	0.0117656	-0.0463466	0.0387778	-0.174327	0.000206521	0.2108	-0.140714	0.107108	-0.0493384	-0.344697	-0.14453	-0.376454	-0.330668	-0.0876646	-0.492348	-0.25437	0.00240991
ILMN_3283155	XR_018361	PREDICTED: misc_RNA (LOC642357), miscRNA.	LOC642357	0.00461683	1.20741	0.135711		-0.379822	0.218455	0.223336	-0.0481596	-0.143216	0.346589	0.0942961	0.269396	0.22502	0.46685	0.144849	0.126566	0.205258	0.190895	0.104792	-0.187899	-0.184635	-0.170428	0.0379917	0.236034	0.00513224	-0.0523709	-0.300592	-0.70251	0.00853885	-0.646241	-0.0215559	-0.0523709	-0.466144	0.247647	-0.121948
ILMN_1759436	NM_015953	nitric oxide synthase interacting protein (NOSIP), mRNA.	NOSIP	0.00221703	1.20648	0.118516		0.167333	0.487396	0.0102286	0.357054	-0.104158	0.190576	-0.0813561	0.177588	0.0560395	0.61395	-0.0621966	0.127978	0.120781	-0.297057	0.144722	0.146866	-0.513185	-0.0514578	0.172485	-0.0289826	-0.151898	-0.0559986	-0.327553	-0.154036	-0.19341	-0.473984	-0.150942	-0.188523	-0.4493	-0.0214184	-0.164837
ILMN_2137536	NM_015534	zinc finger, ZZ-type containing 3 (ZZZ3), mRNA.	ZZZ3	0.00711365	1.20627	0.14434		-0.159783	0.0458712	0.199954	0.0156337	0.25584	0.147533	-0.254531	0.410653	0.247633	0.231665	0.778516	0.185159	0.262094	-0.316898	0.290777	-0.00634752	-0.60471	-0.229128	-0.0255271	-0.0224048	0.04565	-0.324749	-0.210052	-0.320775	-0.0567854	-0.54673	0.109439	0.0156337	-0.0679591	-0.304726	0.147533
ILMN_1705900	NM_013236	ataxin 10 (ATXN10), mRNA.	ATXN10	0.00439587	1.20611	0.135711		0.084228	0.391055	0.189673	0.217795	-0.119498	0.0891689	0.545912	-0.13781	0.0617483	0.121023	0.0129223	0.59023	-0.0917424	0.169045	-0.236024	0.166613	0.0179663	-0.316147	0.367488	-0.0714709	-0.512125	0.107985	-0.0737975	0.0247696	-0.429964	0.224091	-0.29471	-0.124852	-0.0558229	-0.348469	-0.462922
ILMN_1658464	NM_002097	general transcription factor IIIA (GTF3A), mRNA.	GTF3A	0.00164528	1.20587	0.115688		0.114012	0.29465	0.560217	0.00234311	-0.0577919	0.170978	0.249597	0.235714	-0.0553126	0.505869	0.148045	0.0848068	-0.0616331	-0.247771	0.200153	0.0905074	-0.36237	-0.543857	-0.101603	-0.140747	-0.113558	-0.348226	-0.227651	-0.210022	0.167683	0.0469208	-0.268815	0.127334	-0.342814	-0.0849307	-0.119014
ILMN_2252309	NM_013379	dipeptidyl-peptidase 7 (DPP7), mRNA.	DPP7	0.00607131	1.20455	0.140468		-0.300099	0.124146	0.777849	0.134394	-0.36893	0.23058	0.309123	0.143808	0.134134	0.429924	0.0996937	0.338121	-0.07946	-0.203089	-0.185127	-0.333177	0.17061	-0.0676416	-0.00758951	0.214455	0.174183	0.0692305	-0.145061	-0.329602	-0.239891	-0.438817	-0.159662	-0.308298	-0.270068	-0.265598	-0.292778
ILMN_1808984	XM_939090	PREDICTED: chromosome X open reading frame 48 (CXorf48), mRNA.	CXorf48	0.00618346	1.20338	0.140468		0.05023	0.265322	0.218447	-0.0197842	-0.0775467	0.0901225	0.513439	0.0742304	0.206657	0.176218	0.0927821	0.700988	-0.0670123	-0.148507	-0.0511329	0.172353	0.0480814	-0.271894	0.251561	-0.126532	-0.520002	0.107961	-0.202605	-0.368828	-0.350136	0.135937	-0.105969	-0.0505426	0.225807	-0.24033	-0.673928
ILMN_1718069	NM_024039	MIS12, MIND kinetochore complex component, homolog (S. pombe) (MIS12), mRNA.	MIS12	0.00358299	1.20183	0.129842		0.0351044	0.169893	0.46152	0.0628221	0.00549573	0.34265	0.0427875	0.253525	0.0234161	0.230988	0.640963	-0.054613	0.100301	-0.247758	0.133441	0.0827174	-0.200446	-0.28312	0.144033	0.291195	0.080888	0.0103923	-0.445215	-0.297023	-0.256538	-0.288336	-0.380962	-0.156533	-0.154465	-0.459088	0.180104
ILMN_2323385	NM_033091	tripartite motif-containing 4 (TRIM4), transcript variant beta, mRNA.	TRIM4	0.002436	1.20125	0.120328		0.144405	0.265785	0.224135	-0.0697516	0.340559	0.500076	0.00988565	0.388066	0.228333	-0.0285336	0.0800601	-0.182263	0.215768	-0.213078	0.0184412	0.179296	-0.350405	0.133108	-0.341418	-0.128798	-0.278903	-0.300475	0.0355907	-0.137178	-0.0845269	-0.0930664	0.0988049	-0.376586	-0.640677	-0.0816437	0.16264
ILMN_1706687	NM_001007075	kelch-like 5 (Drosophila) (KLHL5), transcript variant 3, mRNA.	KLHL5	0.00428671	1.20108	0.134718		-0.264558	0.181316	-0.162332	0.143001	0.433442	-0.0237536	0.0914034	0.312749	-0.0851519	0.117433	0.750176	0.0795206	0.217631	0.194201	-0.0727679	-0.0860704	-0.435995	-0.232379	0.257376	0.26106	-0.110143	-0.159467	-0.578098	0.0798624	-0.153769	0.0312582	0.0315464	-0.116254	-0.325246	-0.308687	-0.165451
ILMN_1749362	NM_006139	CD28 molecule (CD28), mRNA.	CD28	0.000541809	1.19916	0.0848223		-0.308219	0.0764413	0.100358	0.261139	0.120472	0.046074	0.181028	0.242188	0.268415	0.366278	0.292074	0.0346226	0.252358	-0.00630365	0.238682	0.168029	-0.336221	-0.000929981	0.0362723	-0.0977816	-0.285715	-0.436574	-0.368227	-0.0331326	-0.26624	-0.314399	0.117725	-0.0137495	-0.171742	-0.214677	-0.135934
ILMN_1743677	NM_031844	heterogeneous nuclear ribonucleoprotein U (scaffold attachment factor A) (HNRNPU), transcript variant 1, mRNA.	HNRNPU	0.000842581	1.19903	0.095484		-0.192589	-0.120205	0.156005	-0.0392544	0.141621	0.153811	0.299208	0.292427	-0.00502683	0.601112	0.409992	0.114607	0.212107	-0.0520903	0.175986	0.14068	-0.239786	-0.0573637	0.0148392	1.36825e-05	-0.0723891	-0.0223563	-0.272398	-0.310143	-0.0821561	-0.545135	-0.0704576	-0.0998318	-0.27678	-0.178074	-0.162095
ILMN_3247857	XM_001716679	PREDICTED: hypothetical protein LOC100132345 (LOC100132345), mRNA.	LOC100132345	0.000268515	1.19758	0.0718438		0.0848205	0.294386	0.145385	-0.18769	-0.107752	-0.0878134	0.175135	0.117971	0.293354	0.524288	0.107402	0.199999	0.436405	-0.0967055	0.0625757	-0.327698	-0.126111	-0.099405	-0.122493	-0.103926	-0.127389	0.0249557	-0.205357	0.0785155	-0.20823	-0.356917	-0.14249	-0.0216534	-0.368876	0.0438067	-0.115239
ILMN_3224952	XR_040892	PREDICTED: misc_RNA (LOC729903), miscRNA.	LOC729903	0.000632878	1.19731	0.0897463		0.0508813	0.445089	0.189841	0.0472576	0.202073	0.0904404	-0.100048	0.00304175	0.14914	0.149768	0.0404233	0.238402	0.28006	0.0072121	-0.282404	-0.132018	0.0556462	-0.312499	-0.061448	0.164219	-0.0847842	-0.164377	-0.306365	0.0952198	0.0556462	-0.736984	-0.14967	-0.106235	-0.343314	0.074851	-0.00415344
ILMN_3244096	NM_144982	zinc finger, C3H1-type containing (ZFC3H1), mRNA.	ZFC3H1	0.00553155	1.19572	0.13879		0.254114	-0.0633334	0.0941958	0.315892	0.0373649	-0.0159614	-0.102192	-0.183288	0.0802578	0.240144	1.00471	-0.0706684	0.362875	0.0376171	0.116908	0.0772675	-0.394227	-0.141512	0.169251	0.000525274	-0.0340029	-0.367184	-0.391615	-0.0962858	0.0648975	-0.188359	-0.208353	-0.0191188	-0.0860281	-0.209074	-0.258535
ILMN_1801869	NM_032168	WD repeat domain 75 (WDR75), mRNA.	WDR75	0.00243554	1.19539	0.120328		0.0529625	0.341889	0.351597	-0.0242187	0.139402	0.256611	0.05116	0.126416	0.200491	0.23548	0.568703	-0.185942	0.172917	-0.383599	0.180799	-0.269567	-0.213088	-0.0841339	-0.261167	0.136743	-0.039683	-0.415371	-0.026944	0.000945909	-0.143521	-0.541734	-0.211428	0.000770107	-0.29032	0.0316095	0.0808178
ILMN_1812559	NM_001076785	solute carrier family 7 (cationic amino acid transporter, y+ system), member 6 (SLC7A6), transcript variant 2, mRNA.	SLC7A6	0.00463503	1.19306	0.135711		0.0331682	0.25068	0.139042	0.164157	-0.0396973	0.515605	0.0331682	0.355846	0.0338293	0.31604	-0.190668	-0.0572897	0.129022	0.153594	0.189225	0.0450454	-0.476722	0.141603	0.203643	-0.0690512	0.0340118	-0.195413	-0.478806	-0.280041	-0.184352	-0.694946	0.112004	-0.0422967	-0.343093	0.066358	-0.126559
ILMN_1773968	NM_001018069	SERPINE1 mRNA binding protein 1 (SERBP1), transcript variant 3, mRNA.	SERBP1	0.00764558	1.19306	0.147309		-0.368401	-0.162711	0.308096	0.352143	0.150319	0.0550682	0.0843479	0.143253	0.102951	0.514286	0.717739	0.200872	-0.209873	-0.0380825	0.130618	-0.116191	-0.200835	-0.0927981	0.187455	0.351495	0.0675232	-0.180539	-0.40771	-0.18561	-0.308518	-0.242786	-0.214014	-0.380958	-0.296264	-0.193296	-0.000504131
ILMN_1737298	NM_005911	methionine adenosyltransferase II, alpha (MAT2A), mRNA.	MAT2A	0.00286077	1.19287	0.124909		-0.31405	-0.0889304	0.44502	0.238742	0.00590641	0.184344	0.207578	0.134482	0.139738	0.618999	0.191782	0.106816	0.0537146	-0.0721045	0.00606678	-0.0287461	-0.180203	-0.23628	0.0439276	0.159829	0.141499	-0.263493	-0.222829	-0.141425	0.00969428	-0.583915	-0.286465	0.110513	-0.466573	-0.033291	-0.104775
ILMN_1662318	NM_014167	coiled-coil domain containing 59 (CCDC59), mRNA.	CCDC59	0.00225429	1.19252	0.118516		0.195593	0.0615974	0.112606	-0.0546859	0.173072	0.198276	0.0557582	0.310852	0.202241	0.259259	0.563476	-0.0995702	0.33649	-0.354828	0.125662	-0.081813	-0.210273	-0.0407453	0.20337	0.234289	0.0284091	-0.0655643	-0.314435	-0.329321	-0.221443	-0.170017	-0.163405	-0.464556	-0.264032	-0.309402	0.105135
ILMN_1760338	XM_926688	PREDICTED: similar to SMT3 suppressor of mif two 3 homolog 2 (LOC643357), mRNA.	LOC643357	0.00476301	1.19126	0.135711		0.0799678	-0.0154455	0.325273	0.0922674	0.134578	-0.0231027	0.105613	0.114678	0.361217	0.159929	0.540178	0.0307147	0.0573998	-0.309206	0.15949	-0.0116785	0.00228181	-0.00996851	0.0970261	0.316384	0.0972077	0.0234199	-0.379912	-0.403249	-0.329824	-0.147136	-0.0493333	-0.530757	-0.295275	-0.503228	-0.319184
ILMN_1755364	NM_005402	v-ral simian leukemia viral oncogene homolog A (ras related) (RALA), mRNA.	RALA	0.00266973	1.19086	0.124049		-0.220335	0.0740551	-0.0497255	-0.0397211	0.225738	0.273887	0.0222259	0.0242615	0.208151	0.609449	0.423824	0.0663996	0.209384	0.0399904	0.253328	0.069764	-0.457073	-0.261909	0.130576	0.157696	0.0518493	-0.143968	-0.342594	-0.297206	-0.184312	-0.208825	0.0700144	-0.0354658	-0.336233	-0.380202	-0.101625
ILMN_1791396	NM_005675	DiGeorge syndrome critical region gene 6 (DGCR6), mRNA.	DGCR6	0.00585548	1.19068	0.13879		-0.0686183	0.195646	0.443154	0.0205138	-0.26634	0.292344	0.31461	0.134117	0.213522	0.507279	0.0315609	0.142353	0.0229784	-0.166654	-0.159605	-0.0910536	0.0459157	-0.272911	0.201288	0.333051	0.158258	0.207759	-0.360929	-0.515479	-0.466585	-0.145827	-0.235155	-0.188213	-0.328696	-0.024328	-0.232103
ILMN_1689445	NM_006232	polymerase (RNA) II (DNA directed) polypeptide H (POLR2H), mRNA.	POLR2H	0.00829146	1.18958	0.149977		-0.145366	0.125944	0.467372	0.128945	-0.089718	0.177111	0.0677479	-0.00150862	0.414658	0.591903	0.286499	-0.00998632	0.167574	-0.419117	0.130964	-0.0189135	0.0184464	-0.0874127	0.00214204	0.240755	0.0427489	-0.197585	-0.122656	-0.376343	-0.0367011	-0.588451	-0.394882	-0.180732	-0.521819	-0.0869278	0.0594198
ILMN_1773760	NM_006452	phosphoribosylaminoimidazole carboxylase, phosphoribosylaminoimidazole succinocarboxamide synthetase (PAICS), transcript variant 2, mRNA.	PAICS	0.00662543	1.18955	0.141283		-0.00816781	0.545733	-0.0517564	0.061047	0.247581	-0.332417	-0.0191857	0.457877	0.160995	0.512688	-0.275198	0.24896	0.0669836	0.127474	0.338019	0.0640045	-0.0946842	-0.0775948	-0.249884	-0.0331193	-0.214979	-0.191062	-0.0797539	-0.138818	-0.0910364	-0.70134	-0.0328493	-0.0394952	-0.379189	-0.177452	-0.0417307
ILMN_1663685	NM_005675	DiGeorge syndrome critical region gene 6 (DGCR6), mRNA.	DGCR6	0.00590347	1.18778	0.13879		-0.0718827	0.268694	0.355557	-0.0419141	-0.254947	0.3531	0.106465	0.375218	0.217322	0.48483	0.212502	0.0946457	-0.153642	-0.242757	-0.119498	-0.0592368	0.0621208	-0.339228	0.332229	0.00900109	0.0372009	0.0953338	-0.442752	-0.430053	-0.451051	-0.177014	-0.0945766	-0.393538	-0.0924387	0.0499911	-0.138822
ILMN_2142554	NM_013349	neuron derived neurotrophic factor (NENF), mRNA.	NENF	0.00761725	1.18707	0.147309		-0.242472	-0.0289151	0.346052	-0.0212694	-0.0881131	0.150982	0.172079	0.21033	0.240821	0.686692	0.315436	0.222929	0.258207	-0.366718	0.0960034	0.0459545	0.114059	-0.112392	-0.0362924	0.171381	0.0213564	0.154323	-0.198512	-0.528615	-0.333255	-0.0698408	-0.464408	-0.282553	-0.353151	-0.0834634	-0.0926401
ILMN_1655557	NM_001039937	integrator complex subunit 6 (INTS6), transcript variant 2, mRNA.	INTS6	0.00645137	1.18664	0.1411		0.0533344	0.148598	0.122529	-0.0707638	0.283057	-0.176926	-0.00133632	0.264968	0.161729	0.6103	0.784385	-0.00502511	0.0192235	-0.221428	0.189136	0.166256	-0.193184	0.0158854	0.188045	-0.132163	-0.32605	0.0253359	-0.374364	-0.223326	-0.216423	-0.260198	0.0723498	-0.254896	-0.177388	-0.294025	-0.00656751
ILMN_1737398	NM_016395	protein tyrosine phosphatase-like A domain containing 1 (PTPLAD1), mRNA.	PTPLAD1	0.00402351	1.18581	0.13243		-0.21565	0.117351	0.536653	0.158938	0.095416	0.261803	0.0237614	0.129449	0.246089	0.275847	0.27859	-0.0654096	0.212388	-0.402955	0.14023	0.000660012	-0.315749	-0.2869	-0.0791665	0.191313	0.067363	-0.333781	-0.23774	-0.284127	-0.0299457	-0.564662	0.0614464	-0.0146558	-0.343276	-0.133425	-0.0110309
ILMN_1755582	NM_013271	proprotein convertase subtilisin/kexin type 1 inhibitor (PCSK1N), mRNA.	PCSK1N	0.00626871	1.18522	0.140468		0.00810735	0.10408	0.091073	0.0636464	0.0306323	0.615797	0.335652	0.19765	0.0342745	0.600157	0.0196026	0.00593814	-0.0735772	-0.164649	0.0839704	-0.230287	-0.192205	-0.0749848	0.658178	-0.18586	-0.0582293	-0.260867	-0.0337998	-0.147115	-0.444414	-0.175183	-0.204421	-0.182118	-0.214064	-0.0456603	-0.191879
ILMN_1785179	NM_003343	ubiquitin-conjugating enzyme E2G 2 (UBC7 homolog, yeast) (UBE2G2), transcript variant 1, mRNA.	UBE2G2	0.0026941	1.18372	0.124099		-0.0683169	0.124927	0.455904	0.146418	-0.0761392	0.158129	0.246545	0.385293	0.209752	0.168658	0.0158661	-0.00695556	0.122964	-0.253984	-0.0371563	0.027612	-0.03541	-0.00885563	-0.105403	0.299167	0.245595	-0.190569	-0.29209	-0.523689	-0.202551	-0.453854	-0.170234	-0.341488	-0.0152154	-0.299783	-0.054414
ILMN_1704315	NM_001089587	hCG21078 (LOC389435), mRNA.	LOC389435	0.00442308	1.18273	0.135711		-0.28981	0.0825587	0.475305	-0.0302926	0.17506	0.00212085	0.153867	0.108156	0.200174	0.373049	0.446127	0.128712	0.0549509	-0.187331	0.120988	-0.163572	-0.046422	-0.440546	0.0300654	0.262496	-0.0652908	0.00212085	-0.289023	-0.46865	0.177699	-0.338506	-0.279082	-0.110094	-0.364873	0.0549509	-0.142944
ILMN_2077094	NM_013265	chromosome 11 open reading frame 2 (C11orf2), mRNA.	C11orf2	0.00260843	1.18039	0.124049		-0.105615	0.254962	0.393201	0.283455	-0.272506	0.545498	0.0570675	0.306159	0.156576	0.194651	-0.323566	0.168138	-0.115162	0.00914063	-0.116793	-0.0613003	-0.000676861	-0.0481197	0.00868795	0.0703124	-0.178293	-0.0720312	-0.082356	-0.316432	0.198301	-0.245233	-0.229758	-0.343123	-0.283538	-0.201998	-0.280494
ILMN_1760714	NM_001005	ribosomal protein S3 (RPS3), mRNA.	RPS3	0.00272947	1.18033	0.124227		-0.328902	0.15117	0.460746	0.0317557	0.0478273	-0.00254394	0.121471	0.194463	0.0582159	0.397886	0.273718	0.0317557	0.184497	0.0652978	0.0714836	-0.122202	-0.168499	-0.183356	-0.0388184	0.164319	0.0246351	-0.0826312	-0.256905	-0.472716	-0.0131752	-0.615107	-0.0388184	-0.194862	-0.260233	-0.0683775	0.237886
ILMN_1805807	NM_003459	solute carrier family 30 (zinc transporter), member 3 (SLC30A3), mRNA.	SLC30A3	0.00589592	1.18031	0.13879		0.102301	0.370972	0.111604	-0.00140348	-0.15799	0.10339	0.342249	0.0362167	0.0956063	0.117406	-0.0554053	0.596204	0.0739457	0.0789633	-0.00595744	0.159958	0.0284532	-0.216251	0.44908	-0.22033	-0.326747	0.0502494	-0.193584	-0.0658508	-0.569953	-0.0114993	-0.0743072	0.046009	-0.0733015	-0.353316	-0.485783
ILMN_1744347	XM_060417	PREDICTED: similar to 60S ribosomal protein L36 (LOC127295), mRNA.	LOC127295	0.00460612	1.17813	0.135711		-0.227951	0.304589	0.271748	0.224371	-0.121629	-0.00188958	0.138728	0.205911	0.32275	0.519537	-0.122777	0.237691	-0.00188958	-0.234026	-0.0786863	0.0179393	-0.167965	-0.204403	-0.164396	0.320265	-0.086217	-0.0612377	-0.332033	-0.341434	-0.0808873	-0.521156	-0.0813475	0.00230763	-0.400512	0.120702	-0.121682
ILMN_1727135	NM_032843	fibrinogen C domain containing 1 (FIBCD1), mRNA.	FIBCD1	9.0542e-05	1.17604	0.0419519		0.344285	0.252483	0.0489593	0.106536	0.10734	0.23974	0.0682181	0.0125969	0.168585	0.231288	0.0829751	0.19064	0.0264162	-0.0318727	0.083607	0.0248606	-0.208211	-0.21756	-0.00617541	-0.0612156	-0.175521	-0.191606	-0.0812898	-0.205403	-0.201276	0.32455	-0.201244	-0.199627	0.134664	-0.277398	-0.27386
ILMN_3238623	NM_181705	Lyrm7 homolog (mouse) (LYRM7), mRNA.	LYRM7	0.00353763	1.17356	0.129294		0.0292759	0.168942	0.101706	0.112523	0.00455422	0.012816	0.261496	0.352637	0.0491222	0.444325	0.191139	-0.0801494	0.133754	-0.15149	0.104566	0.191139	-0.281771	-0.0889293	-0.136004	0.0514808	-0.148605	0.078744	-0.299921	-0.262679	-0.11587	-0.704862	0.033964	0.0118804	-0.377583	0.178257	-0.178942
ILMN_1797728	NM_002130	3-hydroxy-3-methylglutaryl-Coenzyme A synthase 1 (soluble) (HMGCS1), transcript variant 2, mRNA.	HMGCS1	0.00177371	1.17252	0.116861		-0.150772	0.0483019	0.395593	-0.1702	0.259771	0.176345	0.1628	0.302557	0.102701	0.257179	0.370952	-0.351514	0.176345	0.0723547	0.0965932	-0.040007	-0.230463	-0.196774	0.0540323	-0.163839	0.180395	-0.375883	-0.338756	-0.105694	-0.0255583	-0.146672	0.0260424	-0.162986	-0.158706	-0.298378	-0.0102632
ILMN_1783889	NM_006251	protein kinase, AMP-activated, alpha 1 catalytic subunit (PRKAA1), transcript variant 1, mRNA.	PRKAA1	0.00273322	1.17042	0.124227		-0.155265	0.0327148	0.29278	-0.0375533	0.282788	0.143448	0.0449895	-0.00474058	0.218949	0.0678913	0.679569	0.0157766	0.162946	-0.00070684	0.0321203	-0.192279	-0.274003	0.0172558	0.371257	0.095113	-0.0506499	-0.234786	-0.207473	-0.327166	-0.25882	-0.0577698	-0.0363654	-0.209761	-0.072658	-0.346447	0.010233
ILMN_1769634	NM_144998	stimulated by retinoic acid 13 homolog (mouse) (STRA13), mRNA.	STRA13	0.006149	1.1701	0.140468		-0.0702083	-0.170038	0.553154	0.0489038	-0.247528	0.239493	0.219291	0.29236	0.0703507	0.400783	0.374048	0.11832	-0.11362	-0.176297	-0.202579	-0.143099	0.0805674	0.0392107	-0.332866	0.138473	0.0842114	0.0841527	-0.259097	-0.273754	0.0112293	-0.272588	-0.343174	-0.00210731	-0.38477	-0.235675	0.0279269
ILMN_3204210	XM_001726716	PREDICTED: similar to QM protein, transcript variant 2 (LOC284393), mRNA.	LOC284393	0.00106933	1.16719	0.100197		-0.0817558	0.311555	0.203326	0.0641918	0.150686	0.0801876	0.137789	0.185262	0.0801876	0.390882	0.093215	0.0576603	0.150686	-0.208935	0.0641918	0.0925368	-0.191474	0.035415	-0.111644	0.160922	-0.0662813	-0.0486769	-0.271955	-0.220247	-0.0486769	-0.519655	-0.139789	-0.216482	-0.43257	0.0925368	-0.00878753
ILMN_1706273	NM_053005	HCCA2 protein (HCCA2), mRNA.	HCCA2	0.00538204	1.16678	0.13802		0.0756956	0.227399	0.219341	0.253477	-0.217358	0.153567	0.216266	-0.0651577	0.249395	0.224544	0.0797786	0.424041	-0.187617	0.0486685	-0.0363053	0.0212357	-0.180935	-0.098249	-0.0930729	-0.281417	-0.298796	0.184896	-0.0336528	-0.0582411	-0.452579	0.352896	-0.186279	-0.109225	0.27059	-0.314636	-0.402524
ILMN_1727184	NM_139281	WD repeat domain 36 (WDR36), mRNA.	WDR36	0.00810806	1.16603	0.14926		-0.362316	-0.161842	0.416544	0.133058	0.0724981	0.0336555	-0.183977	0.216748	0.263018	0.602455	0.52722	0.0481423	0.118217	-0.0645417	0.028147	-0.130936	-0.297071	-0.0901334	0.158197	-0.141374	0.0294214	-0.283532	-0.391158	-0.356668	0.0528399	-0.0861295	-0.0641134	-0.0763041	-0.0718359	-0.109101	0.0767514
ILMN_1780357	NM_030651	proline-rich transmembrane protein 1 (PRRT1), mRNA.	PRRT1	5.73145e-05	1.16563	0.0419519		0.077448	-0.0567052	0.124923	0.0356455	0.000386537	0.272783	0.278674	0.194167	0.143851	-0.0733544	0.288473	0.17131	0.153639	-0.0126171	0.148684	0.0736501	-0.018065	-0.0761513	-0.0135307	-0.148061	-0.0198479	0.00583468	-0.0286203	-0.342478	-0.285832	-0.155442	-0.305779	-0.0780026	-0.176816	-0.191061	-0.206075
ILMN_2141452	NM_000980	ribosomal protein L18a (RPL18A), mRNA.	RPL18A	0.00133386	1.16547	0.108553		-0.021639	0.163505	0.163505	0.0839772	0.0361195	0.31117	-0.0411862	0.309785	0.119683	0.245172	-0.0411862	0.140233	0.0504281	0.0504281	0.140233	-0.0411862	-0.0986571	-0.240549	0.0114543	0.324373	0.0504281	-0.234101	-0.355729	-0.494529	-0.0309503	-0.425511	-0.0668176	-0.111684	-0.240549	-0.0411862	0.00594907
ILMN_1684746	NM_016338	importin 11 (IPO11), mRNA.	IPO11	0.0020014	1.16508	0.118502		-0.184505	-0.13755	0.140654	-0.141986	0.0143731	0.13739	0.203006	0.0305248	0.244801	0.383188	0.487336	0.193088	0.257049	0.0418175	0.0345173	-0.136093	-0.241177	-0.073529	0.0412621	0.179148	0.0942159	-0.0220533	-0.314369	-0.230712	-0.0560611	-0.451098	-0.114905	-0.175783	-0.144448	-0.215183	0.105913
ILMN_1782331	NM_003211	thymine-DNA glycosylase (TDG), mRNA.	TDG	0.00493411	1.16386	0.135711		0.0985059	0.166394	0.113179	0.211361	-0.115151	-0.463647	0.167758	0.199595	0.370834	0.485195	0.142023	0.144171	-0.0208079	0.0871441	0.0163847	0.0993411	0.109578	-0.0769427	-0.29036	-0.152059	-0.104919	-0.0195297	0.113868	-0.124973	-0.0769427	-0.527463	-0.113642	-0.119244	-0.15411	0.0659106	-0.439929
ILMN_1803423	NM_004840	Rac/Cdc42 guanine nucleotide exchange factor (GEF) 6 (ARHGEF6), mRNA.	ARHGEF6	0.00342093	1.16304	0.127602		-0.00576442	0.0628317	0.240439	-0.0933276	-0.0364623	0.193541	-0.0160802	0.296668	0.187466	0.420939	0.30005	0.142265	0.0167244	-0.231891	0.14642	0.132224	-0.0192669	0.0363476	0.128284	0.0555707	-0.110895	-0.114787	-0.091568	-0.230845	-0.632266	-0.0961275	-0.12061	-0.359695	-0.171231	-0.220521	-0.241333
ILMN_2319996	NM_001033853	ribosomal protein L3 (RPL3), transcript variant 2, mRNA.	RPL3	0.000234539	1.16293	0.0718438		-0.0864197	0.0126086	0.0848222	0.141258	-0.0779446	0.177867	0.224335	0.0718035	0.144703	0.298705	0.155192	0.503941	0.118347	-0.0864197	-0.140884	0.0126086	0.00577434	-0.0274368	0.0162324	0.0879832	0.000654915	0.0162324	-0.199026	-0.0864197	-0.366855	-0.0864197	-0.256357	-0.0698961	-0.163432	-0.323431	-0.0779446
ILMN_1802628	NM_203453	phosphatidic acid phosphatase type 2 domain containing 2 (PPAPDC2), mRNA.	PPAPDC2	0.00375525	1.16273	0.131475		0.117799	0.176499	-0.0291988	-0.067497	0.300065	0.105489	0.0890415	-0.0530919	0.192936	0.33771	0.38111	-0.221722	0.209954	0.0271438	0.180453	-0.38117	-0.30196	-0.262424	0.109056	-0.2408	0.180382	-0.309988	-0.240059	-0.174315	0.0416079	-0.358204	-0.0524	-0.214159	0.0974246	-0.0954061	0.226035
ILMN_1816713	BX393727	BX393727 NEUROBLASTOMA COT 25-NORMALIZED cDNA clone CS0DC001YP02 5-PRIME, mRNA sequence	NaN	0.00191453	1.16254	0.116861		0.0645994	0.0352627	-0.0782842	0.114339	0.0222815	0.0222815	-0.0909198	0.230399	0.0649184	0.463068	0.728434	-0.0124838	0.248866	-0.137987	0.0476194	-0.130779	-0.0832528	-0.233275	-0.138012	0.0118508	0.0268426	-0.100043	-0.135984	-0.0760249	-0.0879483	0.0479872	-0.170774	-0.215265	0.0293456	-0.335281	-0.117037
ILMN_1702933	NM_024866	adrenomedullin 2 (ADM2), mRNA.	ADM2	7.33245e-07	1.1624	0.0103979		0.0379558	0.00732759	0.179447	0.164658	0.233372	0.132401	0.255602	0.0529173	0.161223	0.0786867	-0.00636211	0.130435	0.199246	0.0023304	0.111151	0.0601449	-0.168474	-0.0634729	-0.0354674	-0.103521	-0.0831136	-0.1353	-0.240991	-0.184456	-0.10789	-0.191105	0.0170403	-0.131647	-0.271613	-0.0478025	-0.135905
ILMN_2043615	NM_001039842	chromosome 17 open reading frame 90 (C17orf90), mRNA.	C17orf90	0.00777646	1.15951	0.147743		-0.270938	0.0636621	0.366298	0.211587	-0.126753	0.378076	-0.0136151	0.213361	-0.0670918	0.655654	0.160064	-0.0123522	-0.00450525	-0.0402895	-0.0286192	-0.0480507	-0.0215664	-0.0152946	0.257882	-0.118319	0.0131894	0.125047	-0.266695	-0.4211	-0.0433693	-0.27178	-0.154909	-0.0262988	-0.234393	-0.164415	-0.373589
ILMN_1765684	NM_205767	chromosome 19 open reading frame 70 (C19orf70), mRNA.	C19orf70	0.00649392	1.15949	0.1411		0.0158218	0.0611253	0.374478	-0.330641	-0.036138	-0.0970866	0.296347	0.053478	0.152666	0.632922	0.26093	0.194577	0.126954	-0.136278	-0.0627173	-0.163848	-0.0143418	-0.117489	0.039571	-0.173181	0.144034	0.054229	-0.12416	-0.367424	0.126954	-0.408831	-0.305267	-0.0494821	-0.229354	-0.150621	0.0780499
ILMN_1691798	NM_019591	zinc finger protein 26 (ZNF26), mRNA.	ZNF26	0.00264244	1.15913	0.124049		-0.242701	-0.164122	0.348408	0.112247	-0.00896347	0.0382204	0.179925	-0.00055278	0.143611	0.42669	0.629771	0.0904791	0.181085	-0.148831	0.0132097	-0.228867	-0.154214	-0.160457	0.00865236	0.070467	-0.0178069	-0.240521	0.00314435	0.0668458	-0.27028	-0.148144	-0.132502	-0.00952683	-0.184524	-0.185575	-0.126588
ILMN_1788109	NM_013278	interleukin 17C (IL17C), mRNA.	IL17C	0.00494283	1.15854	0.135711		0.0110452	0.472096	0.0640802	-0.165444	0.379932	0.198711	-0.125181	0.000537228	-0.0042332	0.30352	0.213917	0.380158	-0.0880718	-0.0271498	0.182026	0.237182	-0.0233548	-0.141149	0.0291079	-0.414689	-0.218128	0.0365222	-0.192555	-0.115237	-0.130491	0.035689	0.0488756	-0.0985215	-0.210148	-0.361697	-0.312878
ILMN_1740917	NM_000336	sodium channel, nonvoltage-gated 1, beta (SCNN1B), mRNA.	SCNN1B	0.00129935	1.15814	0.108553		0.0422022	0.101014	0.150535	0.114434	0.162304	0.0438417	0.179349	0.159619	-0.127397	-0.130116	0.380759	0.529634	-0.159307	0.0762051	0.0430392	0.106797	-0.157807	-0.209949	-0.13791	-0.275661	-0.0864915	-0.176725	-0.0133659	-0.0361438	-0.36422	0.137962	-0.34931	-0.0759813	0.00658033	-0.0674263	-0.0946842
ILMN_2364174	NM_001892	casein kinase 1, alpha 1 (CSNK1A1), transcript variant 2, mRNA.	CSNK1A1	0.00309456	1.15686	0.124909		0.0266205	0.0182154	0.394217	0.168745	0.0961001	-0.245097	-0.27034	0.211906	0.0746959	0.16944	0.573451	0.0103864	0.356496	0.0760319	0.0783655	0.0459539	-0.0822265	0.00673245	-0.199512	-0.257357	-0.217009	-0.202893	-0.0714707	0.162595	-0.198479	-0.130449	0.0679595	-0.239832	-0.127224	-0.200321	0.00839063
ILMN_1671314	NM_004182	ubiquitously-expressed transcript (UXT), transcript variant 2, mRNA.	UXT	0.00221884	1.15677	0.118516		-0.0573485	0.11898	0.415733	0.0983152	-0.11028	4.6947e-05	-0.00291258	0.0881891	0.0521384	0.421961	0.182079	0.104915	0.100645	-0.00564001	-0.0628769	0.0122264	-0.313073	-0.0887199	-0.017187	0.128073	0.0667658	-0.0144991	-0.115163	-0.480642	0.204597	-0.386743	-0.319965	-0.0867277	-0.279426	-0.0864451	-0.0235775
ILMN_1803775	NM_002157	heat shock 10kDa protein 1 (chaperonin 10) (HSPE1), mRNA.	HSPE1	0.00428641	1.15568	0.134718		0.0441032	-0.131558	-0.142618	0.126578	0.0673338	0.072677	0.0759152	0.228184	0.166235	0.624736	0.451549	0.0774243	0.0653258	-0.333575	-0.0399598	-0.0841494	-0.00533461	-0.0147066	0.0452259	0.00932603	-0.178072	-0.16989	-0.281772	-0.246777	-0.296962	0.0168183	-0.179178	-0.364224	-0.0333484	-0.112341	0.0774243
ILMN_1721449	NM_182894	ceh-10 homeodomain containing homolog (C. elegans) (CHX10), mRNA.	CHX10	0.00254038	1.15545	0.123795		0.133216	0.162657	0.12283	0.341257	0.0173104	0.175969	0.192464	-0.121557	0.0776878	0.205303	0.0998518	0.332951	-0.114247	-0.0216444	0.19162	0.151511	0.0423623	-0.0912006	-0.241068	-0.180402	-0.169603	-0.0673821	-0.0458012	0.273622	-0.375222	-0.11133	-0.202239	-0.319382	0.00814041	0.000411019	-0.460065
ILMN_1686319	NM_020935	ubiquitin specific peptidase 37 (USP37), mRNA.	USP37	0.00178956	1.15477	0.116861		-0.00675249	0.0630161	0.145214	0.165331	-0.0590755	0.104286	-0.0212535	0.0597426	0.151413	0.174051	0.534141	0.0651295	0.0687787	0.0471441	-0.133931	-0.30061	-0.537968	-0.068687	-0.114506	0.112134	0.0579144	-0.278782	0.0275767	-0.358208	-0.131609	-0.162924	0.11299	0.0374653	-0.115376	0.115854	0.0201363
ILMN_1895915	BF445990	7p17e02.x1 NCI_CGAP_Br22 cDNA clone IMAGE:3646155 3, mRNA sequence	NaN	0.00334232	1.15341	0.126735		0.0609219	0.298159	0.0660513	0.0998705	0.379441	0.0711	0.539114	-0.00937768	-0.0434952	0.133484	-0.151871	0.245405	-0.0738744	-0.0630378	-0.0377287	0.15464	0.0237901	-0.240647	-0.506857	-0.0968963	-0.132585	0.0358909	-0.136207	-0.311519	-0.0403811	0.145137	-0.173746	-0.168602	-0.117947	-0.0772349	0.0648982
ILMN_1700762	NM_025245	pre-B-cell leukemia homeobox 4 (PBX4), mRNA.	PBX4	0.00507423	1.15249	0.135711		0.0884115	0.278758	0.606682	0.368939	-0.204316	0.133611	0.221262	-0.00744316	-0.122092	0.210047	-0.0848605	0.0223298	0.0522692	-0.0697826	0.035083	0.110608	-0.265081	-0.209279	-0.0461466	-0.00187732	-0.0974826	0.156872	-0.215701	-0.170023	-0.275919	-0.387295	-0.115335	-0.0687771	-0.087738	-0.206819	0.177935
ILMN_1757660	NM_080590	calcyphosine (CAPS), transcript variant 2, mRNA.	CAPS	0.00615354	1.14912	0.140468		-0.0350254	0.270622	0.138232	0.199913	-0.11748	0.446381	0.122504	0.190515	0.155736	0.225371	-0.336349	0.33977	-0.126452	-0.0263015	-0.0608	-0.130661	0.179165	-0.00413398	-0.0473188	0.0360155	-0.109671	-0.0613351	-0.0385676	-0.447857	0.00250817	-0.43971	-0.221691	0.0305603	-0.148523	0.0779512	-0.267339
ILMN_1710676	NM_012177	F-box protein 5 (FBXO5), mRNA.	FBXO5	0.0011499	1.14789	0.102555		-0.128368	0.0368021	0.496517	-0.0764674	0.18112	0.0180537	0.194908	-0.0594839	0.182162	0.269726	0.312687	0.01567	0.0498767	-0.0746346	0.0653182	0.0289479	-0.261223	0.183388	-0.209284	-0.172944	-0.207426	-0.18027	-0.233821	-0.036481	0.00630335	-0.00602468	-0.0246182	-0.132426	-0.150295	-0.263197	-0.0661894
ILMN_1786630	XM_928122	PREDICTED: hypothetical protein LOC645079 (LOC645079), mRNA.	LOC645079	3.72289e-05	1.14697	0.0419519		0.224302	0.266386	0.0716671	0.0980582	0.15553	0.112099	0.20055	-0.00678253	0.155783	0.0261101	0.0424465	0.226467	0.0575819	-0.0499432	-0.0810711	0.0686753	0.0976854	-0.0962151	0.0053295	-0.218568	-0.201457	0.0636053	-0.0712489	-0.0716024	-0.278484	0.0368182	0.0695962	-0.212536	-0.151109	-0.260277	-0.143282
ILMN_1738095	NM_022817	period homolog 2 (Drosophila) (PER2), mRNA.	PER2	0.00329956	1.14658	0.126429		0.0823896	0.0877017	-0.00105931	0.239398	0.210356	0.214467	0.293135	0.180524	0.0539654	-0.0411855	0.232008	0.155827	0.00686121	-0.256746	0.0718931	0.0772993	0.0456371	0.0409164	-0.235843	0.126594	-0.0245731	0.239954	-0.133674	-0.395294	-0.118352	-0.354715	-0.28563	-0.183358	-0.132207	-0.351532	0.0282029
ILMN_1837739	DB296040	DB296040 BLADE2 cDNA clone BLADE2004377 3, mRNA sequence	NaN	2.95612e-05	1.14635	0.0419519		0.102431	0.139397	0.0236233	0.189901	0.165445	0.221341	0.115876	0.0183726	0.131655	-0.0205839	-0.00450956	0.308942	-0.0814111	0.212172	0.0905571	-0.0711244	-0.057391	-0.233539	0.0407256	-0.197149	-0.200291	-0.00628411	-0.0766818	-0.0609704	-0.233151	-0.111923	-0.0196342	-0.0762435	-0.0156679	0.0348141	-0.306887
ILMN_1737651	NM_015891	cell division cycle 40 homolog (S. cerevisiae) (CDC40), mRNA.	CDC40	0.0068759	1.14633	0.142262		0.0166234	-0.163423	0.152844	-0.0704489	0.189737	0.158672	0.044407	0.093529	0.139449	0.158242	0.649848	-0.205051	0.330387	0.00293268	-0.00599981	-0.0966982	-0.36755	-0.0933466	-0.0809469	0.013586	0.0836781	-0.209596	-0.388027	-0.237332	0.162327	0.00936355	-0.00146954	-0.185987	-0.238436	-0.0743962	0.18004
ILMN_1758356	NM_001004698	olfactory receptor, family 2, subfamily W, member 5 (OR2W5), mRNA.	OR2W5	0.00330768	1.14608	0.126429		0.230001	0.207308	0.094723	0.149212	-0.143427	0.329695	0.344793	-0.0673552	-0.0423516	0.0385506	-0.0388171	0.315521	0.0594857	0.0728825	-0.263947	0.0983449	-0.000270757	-0.232906	0.0229685	-0.149449	-0.286317	0.0739585	-0.182786	0.0496283	-0.2284	0.31896	-0.281393	-0.00713723	0.0971747	-0.209306	-0.280747
ILMN_1750901	NM_144499	guanine nucleotide binding protein (G protein), alpha transducing activity polypeptide 1 (GNAT1), transcript variant 1, mRNA.	GNAT1	0.00223553	1.14548	0.118516		0.024972	-0.0527832	0.16586	0.0922866	-0.00160006	0.0750354	-0.0270381	-0.206075	0.256274	0.448538	0.0991931	0.567565	-0.0483077	0.0625212	-0.208066	0.0118249	-0.166147	-0.0699134	0.0643984	-0.177712	-0.177712	-0.0580399	0.0570135	0.0452203	-0.220842	0.105252	-0.183614	-0.248931	-0.187763	-0.138686	-0.00887539
ILMN_2173524	NM_207305	forkhead box D4 (FOXD4), mRNA.	FOXD4	0.00333604	1.14475	0.126735		0.0988161	0.204399	0.228866	0.240973	-0.146	0.0386613	0.405408	-0.0140344	-0.215563	0.22163	0.0424697	0.426224	0.0537625	0.0445828	-0.105775	0.11595	0.106561	0.0455482	-0.0428535	-0.134639	-0.15609	-0.0607123	-0.197511	0.214497	-0.190642	0.0665689	-0.196763	-0.303568	0.0374294	-0.228888	-0.305145
ILMN_2141453	NM_000980	ribosomal protein L18a (RPL18A), mRNA.	RPL18A	0.00587553	1.14411	0.13879		-0.273168	0.43705	0.104668	0.230156	-0.171472	0.0389289	0.132169	0.235402	0.0871812	0.345673	0.0389289	-0.00356079	0.0689621	0.0804904	-0.100249	-0.0883444	-0.0883444	0.0563181	-0.113672	0.104668	0.0563181	0.0502943	-0.100249	-0.495399	-0.113672	-0.415822	-0.171472	-0.0690984	-0.346676	0.0804904	0.0941434
ILMN_1683660	NM_003756	eukaryotic translation initiation factor 3, subunit H (EIF3H), mRNA.	EIF3H	0.00313346	1.14403	0.124909		-0.15727	0.116873	0.0885062	-0.0946468	-0.0971617	0.138853	0.165118	0.0806809	0.0113724	0.515592	0.0489315	0.325119	0.194257	-0.0854069	0.161245	-0.0358721	-0.126243	0.06199	-0.0380638	0.18534	-0.118083	-0.258934	-0.227475	-0.19524	-0.16472	-0.35138	-0.136184	-0.166195	-0.327224	0.0521939	-0.0963563
ILMN_2400183	NM_001077395	DPH5 homolog (S. cerevisiae) (DPH5), transcript variant 3, mRNA.	DPH5	0.00335397	1.14354	0.126831		-0.106035	-0.0195351	0.0955853	-0.0827785	0.340022	0.162324	-0.134896	0.194765	0.103587	0.473574	0.213302	0.22468	0.00452944	0.0128967	0.0910764	-0.0828925	-0.0466812	-0.0653993	0.266892	0.173455	-0.0429788	-0.28527	-0.244435	-0.182967	0.0206048	-0.365463	-0.168265	-0.112035	-0.212921	-0.127931	-0.104909
ILMN_1665797	NM_001316	CSE1 chromosome segregation 1-like (yeast) (CSE1L), mRNA.	CSE1L	0.000761999	1.14325	0.0932123		-0.113103	0.0514991	0.0742027	0.0112858	0.0772776	0.135119	0.0422986	0.0139993	0.0452411	0.376733	0.460347	0.00173319	0.087483	0.139182	0.0861989	-0.0965308	-0.252602	-0.0963248	-0.0868646	0.0791389	0.162951	-0.347929	-0.177173	-0.285704	-0.0470968	-0.168895	0.0557307	-0.0412429	-0.107743	-0.138939	-0.116348
ILMN_2223805	NM_018718	testis specific, 14 (TSGA14), mRNA.	TSGA14	0.000901839	1.14271	0.0955633		-0.0851169	0.024163	0.250676	0.258439	0.23636	-0.0187568	-0.0864998	0.0203687	-0.0099719	0.420983	0.0884143	0.254259	0.0561908	0.0867629	0.00590329	0.0963066	0.198331	-0.278984	-0.0266873	-0.215429	-0.127621	-0.215592	-0.0877099	0.0363051	-0.199731	0.124722	-0.146801	-0.169993	-0.198978	-0.0825115	-0.166423
ILMN_1784410	NM_014517	upstream binding protein 1 (LBP-1a) (UBP1), mRNA.	UBP1	0.00806256	1.14198	0.149259		-0.28515	-0.194242	0.466742	0.0845126	0.140825	0.250917	0.020787	0.221806	-0.0579132	0.36535	0.394624	-0.0602185	0.190223	-0.184957	0.128926	-0.0192975	-0.229521	-0.0853176	-0.0262675	0.077867	0.146853	-0.304555	-0.251272	-0.173389	-0.0730698	-0.21753	-0.0250066	-0.168549	-0.259588	-0.0853176	-0.0477761
ILMN_1783448	NM_006141	dynein, cytoplasmic 1, light intermediate chain 2 (DYNC1LI2), mRNA.	DYNC1LI2	0.00168549	1.13973	0.116592		-0.112928	-0.123852	0.250247	-0.0447776	0.150434	0.279714	0.0215033	0.0367873	0.164425	0.333764	0.37937	0.0698231	0.14583	-0.0886317	0.00160799	-0.238346	-0.308144	-0.0899824	-0.0436544	0.0665713	-0.0246434	-0.173846	-0.205405	-0.256085	0.0353121	-0.146792	-0.0139288	-0.149458	0.0558899	-0.155748	0.21372
ILMN_1691413	NM_181689	neuronatin (NNAT), transcript variant 2, mRNA.	NNAT	0.0025991	1.13958	0.124049		0.433875	0.16633	0.24858	0.134658	-0.114385	0.0506068	0.0927537	0.0396172	-0.0476374	0.0419679	0.215679	0.354667	-0.0671681	-0.0566127	-0.0791986	0.146805	-0.0669608	-0.155868	0.232781	-0.132469	-0.225601	0.0158797	-0.0870695	-0.154301	-0.240961	0.0118867	-0.169802	-0.164998	0.19262	-0.230153	-0.284288
ILMN_1689868	NM_174940	transmembrane protein 80 (TMEM80), transcript variant 1, mRNA.	TMEM80	0.00619973	1.13937	0.140468		0.0161868	0.199196	0.115422	0.0614437	-0.0978629	0.417754	0.173484	0.105427	0.125016	0.366776	0.0346233	-0.126765	0.30499	-0.23416	-0.0408633	-0.0671972	0.25574	-0.0587166	-0.314958	0.0216659	0.0264915	0.0770037	0.00556184	-0.442742	-0.0772699	0.0953379	-0.230434	-0.205082	-0.236888	-0.183796	-0.0492275
ILMN_1678165	NM_016199	LSM7 homolog, U6 small nuclear RNA associated (S. cerevisiae) (LSM7), mRNA.	LSM7	0.00755312	1.13911	0.146724		-0.0554723	0.011641	0.355269	-0.218048	-0.0538751	0.187965	0.257357	-0.0436335	0.231564	0.541253	0.221612	0.0849359	-0.0331265	-0.0661063	-0.0685192	-0.0220295	-0.0380792	-0.0688809	0.128537	-0.00913654	-0.0701109	0.0224262	-0.125491	-0.293753	0.0960811	-0.13562	-0.460981	-0.0502664	-0.384946	0.0623638	-0.0500791
ILMN_1721138	NM_152407	GrpE-like 2, mitochondrial (E. coli) (GRPEL2), nuclear gene encoding mitochondrial protein, mRNA.	GRPEL2	0.00821875	1.13895	0.149955		-0.0758152	0.126077	0.0872341	0.00541923	0.320777	0.296478	-0.114448	0.166963	0.15273	0.234624	0.390506	-0.0781193	-0.0208982	-0.147735	0.183399	-0.0453803	-0.245373	-0.171085	0.255702	0.083985	-0.0472239	-0.283654	-0.304073	-0.165474	-0.323253	-0.0220159	0.0378654	-0.0662992	-0.458649	0.0552995	-0.043032
ILMN_1663893	NM_152507	chromosome 21 open reading frame 128 (C21orf128), mRNA.	C21orf128	0.00411496	1.13785	0.13262		0.122215	0.0513868	-0.182159	0.320086	0.0731191	0.24499	0.377429	-0.0193154	-0.0587014	0.0864306	0.089817	0.50893	-0.0336931	-0.0255859	-0.0477518	0.194511	-0.0951457	-0.0886091	0.148527	-0.0536588	-0.0764575	-0.136615	-0.0891058	0.0222464	-0.227589	0.0566147	-0.193896	0.012725	-0.0528119	-0.304109	-0.347974
ILMN_1794912	NM_001003785	ATP synthase, H+ transporting, mitochondrial F0 complex, subunit d (ATP5H), nuclear gene encoding mitochondrial protein, transcript variant 2, mRNA.	ATP5H	0.000388544	1.13784	0.0830069		0.105662	0.207547	0.22668	0.135426	-0.0563498	0.1725	0.208726	0.0102225	0.0424796	0.301969	-0.0659208	-0.00759415	-0.00359234	-0.0419494	0.0417434	-0.047784	-0.110848	-0.177	0.0012881	0.102925	-0.0396287	-0.206329	-0.0515436	-0.289325	-0.362515	0.0649548	-0.293679	-0.0648285	-0.183811	-0.0648285	0.0148442
ILMN_1709440	NM_001005502	carboxypeptidase M (CPM), transcript variant 3, mRNA.	CPM	0.0074068	1.13779	0.146391		0.00168311	-0.00778224	-0.0563139	0.298306	-0.0611033	0.271317	0.508471	0.164621	-0.308727	0.0715294	-0.0110504	0.506411	-0.121321	0.160877	-0.219346	0.0250096	-0.203884	-0.220187	-0.0256396	-0.0781237	-0.0179549	-0.121959	-0.0989575	-0.101826	-0.0616383	0.133852	-0.276592	-0.0593095	0.127054	-0.0346101	-0.211243
ILMN_1784333	NM_014701	SECIS binding protein 2-like (SECISBP2L), mRNA.	SECISBP2L	0.00660494	1.1376	0.141258		-0.0492688	0.0748084	0.140349	0.0558333	0.155748	0.194247	-0.213155	0.219002	0.0738469	-0.0365379	0.627369	0.0381012	0.296133	-0.0927337	-0.00520668	-0.0298507	-0.238734	-0.12175	-0.0281301	0.111746	-0.0666633	-0.159794	-0.0852511	-0.280309	0.0413275	0.281869	0.0371524	-0.333969	-0.231263	-0.115953	-0.135335
ILMN_1859392	AW169323	xj22c02.x1 NCI_CGAP_Ut2 cDNA clone IMAGE:2657954 3, mRNA sequence	NaN	0.00209941	1.13692	0.118502		-0.0053502	0.178783	0.14728	0.0995531	-0.188914	0.089544	0.452386	0.141209	0.0902299	0.0110946	-0.00240602	0.447884	-0.0183873	0.0116642	-0.139981	0.14176	0.00613341	-0.137683	-0.0129895	-0.120805	-0.18571	0.0371951	-0.15373	-0.34165	-0.133233	0.0927125	-0.240058	0.0568792	0.0180529	-0.0394198	-0.228365
ILMN_1869354	BM690036	UI-E-CK1-abr-b-07-0-UI.r1 UI-E-CK1 cDNA clone UI-E-CK1-abr-b-07-0-UI 5, mRNA sequence	NaN	0.00658291	1.1361	0.141258		0.177912	0.118256	0.0413909	0.268405	-0.079227	0.0207993	0.107168	0.102669	-0.00274682	0.214893	0.238456	0.214604	0.14084	-0.125133	-0.25869	-0.419843	-0.0345877	-0.185252	0.421277	-0.0744104	-0.289839	0.0568273	-0.044411	-0.0628449	-0.241137	0.00132332	-0.118985	-0.12834	0.276872	0.0145932	-0.295483
ILMN_1688034	NM_004645	coilin (COIL), mRNA.	COIL	0.00314537	1.13587	0.124909		0.235881	0.00871146	0.290042	-0.000877386	-0.0454776	0.185354	0.0123449	0.280343	0.072328	0.180953	0.303139	-0.0414358	0.161632	-0.258061	0.0855498	-0.0946127	-0.238642	-0.0577228	0.0688212	0.0313258	0.127347	-0.219877	-0.220179	-0.442443	-0.0343703	-0.026183	-0.0276773	-0.235541	0.0136218	-0.229102	0.0568335
ILMN_1679690	NM_016247	interphotoreceptor matrix proteoglycan 2 (IMPG2), mRNA.	IMPG2	0.000745034	1.13578	0.0932123		0.0531294	0.244376	-0.125441	-0.0713159	-0.0641403	0.14066	0.451409	-0.0751077	0.0740306	0.0612968	0.0998281	0.414226	0.185891	-0.0185228	-0.178161	-0.0813073	-0.0511394	0.00179083	-0.121449	-0.287606	-0.0534144	-0.0359844	-0.175299	-0.123252	-0.105387	0.0918939	-0.093193	-0.122772	-0.0754107	-0.0829522	0.0349168
ILMN_1664248	NM_182615	hypothetical protein MGC40069 (MGC40069), mRNA.	MGC40069	0.000720562	1.13515	0.0932123		0.0273566	0.178118	-0.0206196	-0.211859	0.185011	0.136833	0.513913	0.214181	0.0877096	0.0314326	0.101151	0.0849089	0.149273	-0.0401414	0.112881	-0.0682104	-0.0678202	-0.0108537	0.103409	-0.221489	-0.195078	-0.0932033	-0.0954536	-0.129341	-0.12955	0.0383274	-0.0302904	-0.0619163	-0.145968	-0.284385	-0.0848192
ILMN_1794807	XM_933387	PREDICTED: similar to cache domain containing 1 (LOC653696), mRNA.	LOC653696	0.000785921	1.13271	0.0951258		0.145142	0.0525458	0.138285	-0.0939422	0.108451	0.249437	0.346579	-0.111244	0.0041706	-0.0973766	0.15166	0.323384	0.0666463	0.0364193	0.0751988	0.103283	0.026926	0.0143046	-0.0781982	-0.226191	-0.292944	-0.197265	-0.0615119	-0.0367389	-0.0884793	0.0216616	-0.21057	-0.292045	-0.0407216	-0.107729	-0.062241
ILMN_1776216	NM_173470	membrane magnesium transporter 1 (MMGT1), mRNA.	MMGT1	0.00553166	1.132	0.13879		-0.182896	-0.0627166	0.0677531	-0.160642	0.185658	0.235265	0.107644	-0.0398168	0.234534	0.281291	0.402021	-0.090067	0.250001	0.0726958	0.0699218	0.22155	-0.255102	-0.12336	-0.0953027	-0.179967	-0.00702561	-0.0908412	-0.20887	-0.286077	-0.101943	0.0553891	0.0217283	-0.216224	-0.27951	-0.148546	0.162725
ILMN_1904111	BQ019141	UI-H-DT1-awm-p-14-0-UI.s1 NCI_CGAP_DT1 cDNA clone IMAGE:5891581 3, mRNA sequence	NaN	0.000173234	1.13048	0.0614143		-0.0942209	0.176213	0.1375	-0.0611999	0.137673	0.231021	0.0258389	-0.0588852	0.116912	0.0619889	0.118039	0.422239	0.06521	0.0515175	0.0276997	-0.0310238	-0.187891	-0.0792469	-0.219855	-0.139388	-0.163	0.080509	-0.0257936	-0.149903	-0.153446	-0.0901336	-0.203042	-0.00403511	-0.122277	0.0741095	-0.00630655
ILMN_1768293	NM_153485	nucleoporin 155kDa (NUP155), transcript variant 1, mRNA.	NUP155	0.00720867	1.13025	0.14464		-0.094573	0.132445	0.0710497	-0.0532398	-0.0363538	0.0733169	0.513551	3.58295e-05	0.0566126	0.223823	0.0778689	0.354122	0.000685422	-0.0627405	0.202202	0.057594	-0.347504	-0.0873137	0.154892	-0.102107	0.0111446	-0.0400438	-0.199752	-0.0497699	-0.0983299	-0.308378	-0.29559	-0.0169369	-0.302005	-0.173642	0.11853
ILMN_1782504	NM_015942	MTERF domain containing 1 (MTERFD1), mRNA.	MTERFD1	0.00584894	1.12844	0.13879		-0.234952	0.207808	0.265785	-0.0850061	0.110398	0.152194	-0.0985082	-0.0980354	0.0447805	0.207921	0.561608	0.156543	0.154115	-0.011693	0.0196082	-0.105739	-0.284715	-0.260314	-0.154768	0.151871	-0.0615189	-0.232523	-0.0808694	-0.0252926	0.0189591	-0.262603	-0.0250339	0.0782738	-0.0804393	-0.0519434	0.0119291
ILMN_1728803	NM_015980	HMP19 protein (HMP19), mRNA.	HMP19	0.00114272	1.12653	0.102555		0.151266	0.0471862	0.104441	0.149846	0.119085	0.133195	0.0107837	0.0730562	-0.0838691	-0.0440872	0.0943792	0.324885	-0.0127266	0.211632	-0.0778443	0.119424	0.0242923	-0.0127708	-0.216283	-0.112761	-0.303562	-0.048903	0.00658382	-0.0802818	-0.158434	0.243766	-0.224966	-0.0278864	-0.0032914	-0.131085	-0.364844
ILMN_1657873	NM_022459	exportin 4 (XPO4), mRNA.	XPO4	0.00624522	1.12626	0.140468		-0.145522	0.146178	0.175125	0.227019	0.0363903	0.207399	0.0401265	0.0487561	0.000689164	0.368654	0.0882107	0.0246819	0.198915	-0.283443	0.111221	0.0725171	-0.0339369	-0.15995	-0.226859	0.130878	0.0755087	-0.274877	-0.0475532	-0.318773	-0.00496019	-0.35135	-0.131644	-0.0980468	-0.31159	0.0414041	-0.0122532
ILMN_3278438	XM_001715558	PREDICTED: hypothetical LOC441018 (LOC441018), mRNA.	LOC441018	0.00106121	1.12625	0.100197		0.110436	0.135935	0.208196	0.0825503	-0.120188	-0.0687751	0.217955	0.216902	-0.0198773	0.26334	0.0286755	0.309595	0.149418	-0.124623	-0.234546	-0.00218773	-0.0199197	0.0512258	-0.0266636	0.0360141	-0.0494542	-0.0490954	-0.244561	0.0691256	-0.130201	-0.054219	-0.132723	-0.250847	0.168882	-0.183502	-0.176033
ILMN_1815626	NM_001360	7-dehydrocholesterol reductase (DHCR7), mRNA.	DHCR7	0.0080169	1.12603	0.148824		0.168715	0.255149	0.110745	0.0248688	-0.199966	0.0324973	0.399153	0.0439683	-0.0410459	0.0616453	-0.176241	0.323448	-0.0864148	0.204413	-0.269572	-0.000667927	0.149147	-0.183774	0.0596778	-0.0719684	-0.360987	0.220437	-0.0751026	0.0430211	-0.122689	-0.158726	-0.207735	0.0212702	-0.249517	-0.106264	-0.236568
ILMN_3225406	XR_015474	PREDICTED: misc_RNA (LOC728640), miscRNA.	LOC728640	0.00164829	1.12596	0.115688		0.117054	0.0230748	-0.0754404	0.0174615	0.0138232	0.267238	-0.0728591	-0.0115685	0.303407	0.373721	0.358308	0.143798	0.0399147	-0.147378	-0.0517978	-0.115955	-0.0677493	0.0334042	-0.176249	-0.0374417	-0.0941771	-0.229895	-0.119319	0.0478907	-0.0915109	0.149062	-0.103634	-0.261025	-0.077647	0.0485641	-0.122243
ILMN_1739821	NM_004094	eukaryotic translation initiation factor 2, subunit 1 alpha, 35kDa (EIF2S1), mRNA.	EIF2S1	0.00540677	1.12588	0.13802		-0.216852	-0.182931	0.339601	0.130585	0.163666	0.0349773	0.0789148	0.178358	-0.0216475	0.202097	0.363222	0.131781	0.0300403	-0.0414091	-0.0556531	-0.177604	-0.310889	0.0172634	-0.141633	0.217989	0.0659883	-0.133276	-0.15779	-0.125731	-0.285485	-0.219445	0.0184113	-0.0418146	-0.223644	-0.071967	0.162842
ILMN_1671374	NM_014047	chromosome 19 open reading frame 53 (C19orf53), mRNA.	C19orf53	0.00709935	1.12503	0.14434		0.0600405	0.00365587	0.340292	0.0478261	-0.0598684	0.0641322	0.104826	-0.145001	0.266559	0.393133	0.0384192	0.207277	0.0745421	-0.252451	-0.117581	0.0224638	-0.0693047	-0.0878903	-0.047389	-0.0519992	-0.0631129	0.0911219	-0.081554	-0.563021	0.0499299	-0.088846	-0.116511	-0.154208	-0.088846	-0.238988	0.104826
ILMN_1766346	NM_020713	zinc finger protein 512B (ZNF512B), mRNA.	ZNF512B	0.00286538	1.12481	0.124909		0.127753	0.128907	0.0762418	-0.00099537	0.0590596	0.188186	0.124606	0.0999526	0.0772771	0.244174	-0.157246	0.234347	0.196669	-0.138071	-0.118573	-0.199796	0.0762273	0.0373761	0.0107238	0.153218	0.144104	0.0765919	-0.316433	-0.228653	0.0410774	-0.04147	-0.263837	-0.320479	-0.233713	-0.0115906	-0.158338
ILMN_1865013	CN291296	17000600023745 GRN_PRENEU cDNA 5, mRNA sequence	NaN	0.00559318	1.1245	0.13879		0.0741019	0.189163	0.269181	0.00138593	0.0363219	0.143913	0.178957	-0.0483564	-0.0166753	0.153957	0.0898864	0.0763016	0.173684	-0.0565576	-0.200762	-0.203803	0.332144	-0.25394	-0.145599	-0.054622	-0.0906671	-0.249796	-0.0961138	-0.160042	-0.0704284	0.262712	0.0684748	-0.0517256	-0.0935735	-0.448743	0.115016
ILMN_3236725	XM_001714231	PREDICTED: hypothetical LOC100133638 (LOC100133638), mRNA.	LOC100133638	0.0074779	1.12267	0.146391		0.399749	-0.0584757	0.110398	-0.0714379	0.0931954	0.15162	0.22706	0.15338	-0.111289	0.109148	0.019966	0.28014	0.0742766	-0.0848555	-0.0268583	-0.361867	0.0338785	0.07817	-0.109388	0.0505764	-0.437159	0.0760592	-0.0663824	-0.146688	-0.261112	0.207357	-0.143687	-0.0412879	0.132224	-0.0938827	-0.157956
ILMN_3205404	XM_001717507	PREDICTED: interleukin-like (LOC723805), mRNA.	LOC723805	0.00729934	1.12186	0.14537		0.143523	0.271601	0.178512	0.0484874	-0.214239	0.135951	0.235202	0.0249981	-0.0915116	0.179044	0.0645503	0.41782	-0.101267	-0.0400086	-0.0960486	0.0772699	-0.134625	-0.0895367	-0.290405	-0.0684067	-0.130919	-0.0812905	-0.11398	0.0335936	-0.200685	0.278651	-0.257293	-0.087731	0.200308	-0.0984535	-0.239444
ILMN_1711072	XM_497731	PREDICTED: similar to F-box only protein 25 isoform 2 (LOC441920), mRNA.	LOC441920	0.00213444	1.12178	0.118516		0.042897	-0.0334299	0.0990407	-0.0115076	0.0536854	0.267808	0.356845	0.20373	0.0197109	0.0707282	0.040897	0.225933	0.0286283	-0.0434019	-0.144777	0.0467415	-0.0263081	-0.101749	0.0858167	-0.119838	-0.247125	-0.23427	-0.0560315	-0.232967	-0.161002	0.309848	-0.203927	0.108766	-0.0814409	-0.00930919	-0.146071
ILMN_2343775	NM_001035258	ribosomal protein L38 (RPL38), transcript variant 2, mRNA.	RPL38	0.00023374	1.12089	0.0718438		-0.0486641	0.0860621	0.15903	-0.104137	0.15903	0.0561735	0.078624	0.207234	0.078624	0.371144	-0.0817927	0.101537	0.0664153	-0.00323251	0.0747569	-0.0992003	-0.104137	-0.234769	-0.00323251	0.078624	-0.107184	-0.0956804	-0.141825	-0.0992003	-0.229996	-0.0605186	-0.134839	0.00396095	-0.141825	0.0379119	-0.174501
ILMN_1709877	NM_178556	tripartite motif family-like 1 (TRIML1), mRNA.	TRIML1	0.00713522	1.12058	0.14434		0.128603	0.244629	-0.0846096	0.034875	-0.0435815	0.221475	0.245679	-0.169876	0.00409024	-0.0166556	0.0811796	0.368471	0.161943	0.0237096	-0.131269	0.116998	0.0774838	-0.0737329	0.194313	-0.129174	-0.195859	0.0438031	-0.190655	0.0496847	-0.21108	0.0209613	-0.309456	-0.0435815	0.0671689	-0.225799	-0.394971
ILMN_1665423	NM_053023	zinc finger protein 91 homolog (mouse) (ZFP91), mRNA.	ZFP91	0.00688252	1.12055	0.142262		-0.111011	-0.0922713	0.0902028	0.0242345	0.0564355	0.409319	-0.119858	0.180451	0.152567	0.169275	0.312959	0.0216258	0.0480773	0.00873613	-0.0340537	-0.123932	-0.179176	0.0183635	-0.22028	0.0183635	-0.263417	-0.33426	-0.0355621	-0.0854201	0.326618	0.114694	-0.172694	-0.196234	-0.152686	0.0533778	-0.127989
ILMN_1738099	NM_024766	chromosome 2 open reading frame 34 (C2orf34), mRNA.	C2orf34	0.00103056	1.12035	0.100197		0.0907035	0.15461	-0.00466758	0.147214	-0.0120441	0.132871	0.243416	0.123055	0.0523609	0.181403	-0.0665287	0.348835	-0.0409869	-0.0862147	0.081953	0.0733684	-0.00490883	-0.0037453	0.0506269	-0.167917	0.0515302	-0.179264	-0.216648	-0.0259449	-0.186249	-0.237325	-0.0298243	0.00978935	0.0245214	-0.238218	-0.253953
ILMN_1658519	NM_022829	solute carrier family 13 (sodium-dependent dicarboxylate transporter), member 3 (SLC13A3), transcript variant 1, mRNA.	SLC13A3	0.00213043	1.12003	0.118516		-0.0158454	0.190724	0.209732	0.00460228	0.0470278	0.0127249	0.306803	0.0524238	0.0628465	-0.0567919	0.035751	0.348284	0.207249	-0.0828273	-0.0326248	0.125868	-0.131266	-0.218604	0.123784	-0.213122	-0.0625802	0.0133868	-0.0820063	-0.100154	-0.104037	0.257386	-0.259019	-0.093606	-0.115835	-0.121159	-0.160316
ILMN_1824029	AW290884	UI-H-BI2-agd-b-02-0-UI.s1 NCI_CGAP_Sub4 cDNA clone IMAGE:2723667 3, mRNA sequence	NaN	0.0032678	1.12002	0.126303		0.121832	0.235678	0.13466	0.0825971	-0.146377	0.166258	0.491005	0.124123	-0.115518	0.031345	-0.103858	0.252775	-0.0129688	0.075974	-0.128892	0.0934486	-0.118597	-0.109485	0.00118671	-0.163682	-0.149853	0.168499	0.136264	-0.103895	-0.189549	-0.095658	-0.134093	-0.173357	0.0410932	-0.04299	-0.186183
ILMN_1696038	XM_097792	PREDICTED: hypothetical LOC150051 (LOC150051), mRNA.	LOC150051	0.00503024	1.11998	0.135711		-0.0156935	0.0186828	0.00590293	0.0909333	0.00121388	0.157461	0.216416	-0.106323	0.127076	0.146988	0.129801	0.408899	-0.0119816	0.110089	-0.170403	0.0791089	-0.000859803	-0.158039	0.442023	-0.0770498	-0.237689	0.0094917	-0.230854	-0.267542	-0.180415	0.0454947	-0.10342	-0.0888729	-0.0653318	-0.11369	-0.10726
ILMN_1799207	XM_926142	PREDICTED: hypothetical LOC642691 (LOC642691), mRNA.	LOC642691	0.00508176	1.11894	0.135711		0.108281	-0.0472111	0.115392	-0.283513	-0.0147599	0.191501	0.0872325	0.0296553	0.122126	0.208555	0.035074	0.487582	0.102983	0.0772527	0.131418	-0.00550642	0.015336	-0.00899848	-0.20227	-0.372691	-0.0676196	-0.032994	-0.132601	-0.0885798	-0.140097	0.180416	-0.0458671	-0.0498065	-0.0585012	-0.150504	-0.245819
ILMN_3184315	XM_001715563	PREDICTED: hypothetical protein LOC100129218 (LOC100129218), mRNA.	LOC100129218	0.00284984	1.11814	0.124909		0.222796	0.0857643	0.0208769	0.166292	0.0145962	0.0619427	0.1704	-0.0566758	0.223223	-0.0831977	0.189319	0.144096	0.0839954	0.0103082	0.00308235	0.0256649	-0.22768	-0.0580895	-0.179016	-0.282346	-0.123122	0.192242	-0.0107338	-0.095177	-0.345886	0.285865	-0.22495	0.0172972	-0.00306343	-0.126665	-0.0637243
ILMN_1688749	XR_017634	PREDICTED: hypothetical LOC400963 (LOC400963), mRNA.	LOC400963	0.00804187	1.1181	0.149071		-0.282966	0.182958	0.21239	0.307567	0.00513361	0.108295	0.000196552	0.0209654	0.170749	0.101101	0.00865345	0.0806777	-0.0464825	0.263364	-0.176902	-0.109358	-0.130435	0.0806777	-0.172705	0.132363	0.00513361	-0.136439	-0.0701671	-0.358354	0.149171	0.00865345	-0.199577	-0.0305056	-0.444328	0.0519043	0.038344
ILMN_1669252	NM_003591	cullin 2 (CUL2), mRNA.	CUL2	0.00800203	1.11795	0.148824		0.031625	-0.090889	0.162072	0.0502765	0.199756	-0.128124	0.0905067	-0.0781098	0.275651	0.23947	0.532506	-0.135698	0.0603149	-0.0750953	0.103934	-0.00883264	-0.231162	0.00460896	-0.169885	0.00779589	-0.00388142	-0.287488	-0.299875	-0.0164111	-0.0465493	-0.234477	0.0958696	-0.0752262	-0.0443525	-0.129028	-0.0223678
ILMN_1848893	BM726848	UI-E-EJ0-air-c-22-0-UI.r1 UI-E-EJ0 cDNA clone UI-E-EJ0-air-c-22-0-UI 5, mRNA sequence	NaN	0.00230963	1.11746	0.118516		0.0611143	0.0719778	0.230184	0.0646745	-0.0112725	0.123325	0.0192977	0.0546978	0.180073	-0.0541874	0.0608887	0.51626	-0.153564	0.0510522	-0.0759431	-0.0582227	-0.0635039	-0.210738	-0.0317174	-0.259637	-0.0359314	-0.152784	0.0173972	0.120456	-0.0365804	0.0161719	-0.0178188	-0.146147	-0.14701	0.101378	-0.268368
ILMN_1817255	BX537514	mRNA; cDNA DKFZp313N0919 (from clone DKFZp313N0919)	NaN	0.00830485	1.11644	0.149977		-0.0909545	-0.0400718	0.0564424	0.125149	-0.0715105	0.149242	0.0867267	0.0570242	-0.165091	0.386133	0.325365	0.00923406	0.278256	0.0481571	-0.0152216	-0.270363	-0.231287	-0.117556	0.00689218	0.125728	0.0119767	-0.0260317	-0.100148	-0.269944	0.0637617	-0.3742	-0.0744305	-0.218524	-0.0421565	0.114749	0.116704
ILMN_1683854	NM_001007101	zinc finger protein 484 (ZNF484), transcript variant 2, mRNA.	ZNF484	0.00538955	1.11619	0.13802		-0.225887	-0.0145257	0.22637	-0.186804	0.0841661	-0.0831695	0.222487	0.0373273	0.00268499	0.173331	0.449949	0.229833	0.353691	-0.0300357	0.0511996	-0.145716	-0.0443536	-0.140656	-0.163064	-0.0432725	-0.0589838	0.0539512	-0.0800164	-0.017106	-0.111998	-0.18579	0.00767232	0.0351281	-0.238205	-0.04796	-0.0617435
ILMN_1655190	XM_944547	PREDICTED: hypothetical protein LOC649043, transcript variant 2 (LOC649044), mRNA.	LOC649044	0.00263186	1.11581	0.124049		-0.0964418	0.0824998	-0.0364537	0.0517662	-0.0370628	0.113614	0.412139	-0.0305262	0.0741413	0.274409	0.0687556	0.278187	0.109243	-0.00095531	-0.184613	-0.120098	0.00290899	-0.122012	0.118562	-0.123052	-0.13868	0.141875	-0.0808196	-0.104515	-0.240006	0.140283	-0.149844	-0.10199	0.126592	-0.164399	-0.153774
ILMN_1682857	NM_174889	NADH dehydrogenase (ubiquinone) 1 alpha subcomplex, assembly factor 2 (NDUFAF2), mRNA.	NDUFAF2	0.00147684	1.11572	0.113203		-0.0061048	-0.0890038	0.247383	-0.138964	0.186607	0.198555	0.0682895	0.148542	-0.00103087	0.383528	0.0683995	0.0814002	0.11296	-0.0842143	-0.0488443	-0.0744579	-0.120111	-0.24424	-0.125417	0.19969	0.0826027	0.0535736	-0.156191	-0.153504	-0.109013	-0.122978	-0.148321	-0.136563	-0.0772896	-0.0754117	-0.000680425
ILMN_1677532	NM_007375	TAR DNA binding protein (TARDBP), mRNA.	TARDBP	0.00361672	1.11504	0.129842		0.0486193	-0.00235415	0.0877568	0.0946799	-0.0403629	-0.0779062	0.150127	0.0860396	-0.0952271	0.0425022	0.560104	0.188786	0.161315	0.0475655	-0.0543015	-0.0781926	-0.0509882	-0.100996	0.00325909	-0.310874	-0.205324	-0.140993	-0.0290313	0.115467	-0.0286506	-0.0774808	-0.0445304	-0.0728751	0.0519608	0.127516	-0.254671
ILMN_1677402	XM_941665	PREDICTED: hypothetical LOC387763 (LOC387763), mRNA.	LOC387763	0.00387837	1.11496	0.131475		0.264948	0.00342196	0.112307	-0.152481	0.160816	0.260789	0.240135	0.0474473	0.0380722	0.0759187	0.0177244	0.202805	-0.0190734	-0.0213529	0.0361756	0.117285	0.199719	0.00137529	-0.411948	-0.0883786	-0.117616	-0.0982313	-0.0725667	-0.113112	0.0386549	-0.0830942	-0.276219	-0.259087	-0.0945543	0.000356075	0.0476487
ILMN_1797453	NM_015396	armadillo repeat containing 8 (ARMC8), transcript variant 2, mRNA.	ARMC8	0.000498462	1.11418	0.0832933		-0.00717982	0.047317	0.228513	-0.026382	-0.0858952	0.0900414	0.186469	-0.0157284	0.0975515	0.227411	0.120671	0.265541	0.20706	-0.0976527	-0.0552584	0.0214797	-0.091523	-0.0777925	0.13984	0.0703054	-0.0417979	-0.242527	-0.100078	-0.178803	-0.236079	-0.0179837	-0.0161366	-0.105308	-0.0267384	-0.0497143	-0.140623
ILMN_3186410	XM_001727029	PREDICTED: hypothetical protein LOC100128002 (LOC100128002), mRNA.	LOC100128002	0.00319057	1.11376	0.125163		-0.0124194	0.208878	0.180772	-0.10751	-0.088788	0.116406	0.0972011	0.192519	0.23266	0.132508	0.111921	0.152394	0.0217206	-0.00731325	-0.194834	-0.0675499	0.0527093	-0.0989726	0.130437	-0.167102	-0.291906	0.242415	-0.0540216	0.00797479	-0.255901	0.139658	0.0244309	-0.060755	-0.213494	-0.203283	-0.137472
ILMN_1744623	XM_945628	PREDICTED: similar to Williams Beuren syndrome chromosome region 19, transcript variant 5 (MGC57359), mRNA.	MGC57359	0.00298986	1.11347	0.124909		0.134584	0.08285	-0.0172934	0.0901499	0.143291	-0.0462045	-0.00630907	0.0824553	0.130052	0.148765	0.157977	0.22086	0.0151655	0.0620813	0.0796765	-0.00728307	-0.286259	-0.0958676	0.146224	-0.10798	-0.250894	-0.236552	-0.00950608	-0.0403026	-0.0488333	0.19042	-0.219764	-0.317101	0.217452	-0.0273465	-0.167007
ILMN_1789112	NM_173633	transmembrane protein 145 (TMEM145), mRNA.	TMEM145	0.00457824	1.11347	0.135711		-0.045774	0.238846	0.104661	0.0379839	0.0166184	0.0942403	0.421257	-0.10482	-0.0956341	0.193755	0.0799873	0.309879	-0.158145	0.17671	-0.10256	0.0109042	0.0577676	-0.125062	0.0973402	-0.182301	-0.0823796	-0.123364	-0.0433144	0.0521133	-0.185615	0.0825193	-0.113174	-0.00637937	0.0595011	-0.268872	-0.22165
ILMN_1705674	NM_004605	sulfotransferase family, cytosolic, 2B, member 1 (SULT2B1), transcript variant 1, mRNA.	SULT2B1	0.00105879	1.11295	0.100197		0.0958853	0.122235	0.0640562	0.0859271	0.141487	-0.0288828	0.0377083	-0.0282371	-0.0554213	0.144689	0.0757009	0.55435	-0.00499155	-0.00352148	-0.0508944	-0.148704	-0.0616132	-0.0758315	0.0333278	0.0610532	-0.0738005	-0.0766734	-0.0425248	-0.0128852	-0.222952	-0.011142	-0.168851	-0.00530432	0.0181162	-0.205805	-0.121862
ILMN_1749789	NM_005320	histone cluster 1, H1d (HIST1H1D), mRNA.	HIST1H1D	0.00643718	1.11288	0.1411		-0.0299412	0.312	0.0116201	0.317525	0.00465396	-0.195963	-0.0687592	0.0664147	-0.0219614	0.572389	-0.020942	0.100885	0.0919843	0.0382184	-0.0169067	-0.0694616	-0.0328392	-0.0926874	-0.198763	-0.140525	-0.00179378	-0.101064	-0.149283	0.134367	-0.119472	-0.0306249	-0.00763188	-0.116827	-0.211521	0.020743	-0.0582488
ILMN_1741843	NM_183059	retinal degeneration 3 (RD3), mRNA.	RD3	0.0047548	1.11244	0.135711		-0.183925	0.141636	0.260056	0.0748211	0.140573	0.047715	0.152616	0.0404351	0.0283894	0.168255	0.0127423	0.255175	-0.000358546	0.00072416	-0.0799022	0.266511	0.134185	0.0669881	-0.163834	0.0140993	-0.296746	-0.158339	-0.151595	-0.172133	-0.309661	0.0949605	-0.0262478	-0.0664402	6.67233e-05	-0.195831	-0.186522
ILMN_2141444	NM_000980	ribosomal protein L18a (RPL18A), mRNA.	RPL18A	0.00408785	1.11111	0.13262		-0.0464231	0.182312	0.261761	0.0632097	-0.165816	0.167286	-0.00953617	0.235142	0.158809	0.277687	-0.0277553	0.0821565	-0.0464231	-0.00257399	-0.016227	-0.0577885	-0.105783	-0.016227	-0.0879052	0.158809	-0.165816	-0.0403993	-0.142683	-0.245944	-0.100278	-0.308723	0.0821565	-0.164928	-0.211068	0.182312	0.0285002
ILMN_1787548	NM_005529	heparan sulfate proteoglycan 2 (HSPG2), mRNA.	HSPG2	0.00639068	1.11103	0.14097		-0.00447672	0.218526	0.27286	0.123595	0.213559	0.121687	-0.073695	-0.0123583	0.146367	0.105804	-0.0406678	0.0374097	0.00739333	0.106237	-0.304397	-0.00260418	-0.0155306	0.121476	0.0363663	-0.321003	-0.0101898	-0.237933	-0.0462997	-0.0235764	-0.0104432	0.236723	0.106018	-0.263732	0.093782	-0.220074	-0.236791
ILMN_1688020	XM_937832	PREDICTED: FLJ43950 protein, transcript variant 2 (FLJ43950), mRNA.	FLJ43950	0.00241733	1.11042	0.120328		0.0609126	-0.0150831	-0.106288	0.0867985	-0.18509	0.163412	0.296295	0.119852	-0.00140689	0.316981	-0.0124034	0.266542	0.123107	0.0988861	-0.0741775	-0.0122318	-0.0282373	0.0776658	0.16322	-0.132893	-0.0337894	-0.117175	-0.016237	-0.141863	-0.264122	0.0231024	-0.245016	-0.0684635	-0.0171064	-0.0579786	-0.151217
ILMN_1718636	XM_928218	PREDICTED: hypothetical LOC645183 (LOC645183), mRNA.	LOC645183	3.66807e-06	1.11	0.0135511		0.205895	0.146452	-0.0260711	0.0925499	0.119528	0.00353241	-0.0148844	0.00407084	0.0859957	0.0910539	0.0228995	0.102805	0.110508	0.157921	0.0417355	-0.107019	-0.0381945	-0.0507865	-0.204761	-0.0991829	-0.0617557	-0.00750671	0.000756587	0.0220849	-0.14479	0.00240459	-0.0643014	-0.167548	-0.20069	-0.0423658	-0.0990964
ILMN_1737965	NM_022726	elongation of very long chain fatty acids (FEN1/Elo2, SUR4/Elo3, yeast)-like 4 (ELOVL4), mRNA.	ELOVL4	0.00607402	1.10987	0.140468		-0.165417	-0.0207239	0.248729	0.0443126	0.00919483	-0.131902	0.31131	0.0303087	0.0434511	0.133464	0.448825	0.132922	0.152962	-0.0258946	-0.130872	0.181648	-0.087666	-0.0550356	-0.0183822	0.019583	-0.251941	-0.039459	-0.0344185	-0.210469	-0.044717	-0.00448279	0.010396	-0.17271	0.0636165	-0.261881	-0.0486352
ILMN_1697998	NM_001099286	family with sequence similarity 54, member A (FAM54A), transcript variant 1, mRNA.	FAM54A	0.000497592	1.10943	0.0832933		0.132195	0.225816	0.0693828	0.099305	0.0433378	0.20199	-0.0661065	-0.124901	-0.0993342	0.111739	0.127292	0.0162552	0.307923	0.0779918	-0.0814578	-0.00669848	-0.0619664	0.0997071	-0.0839791	-0.0230784	-0.0413662	-0.169235	-0.152797	-0.077684	-0.291414	0.0166078	-0.164186	-0.105087	-0.0304821	0.00707049	-0.0174461
ILMN_1884723	BI755364	603024968F1 NIH_MGC_114 cDNA clone IMAGE:5195560 5, mRNA sequence	NaN	0.00705474	1.10942	0.14434		0.0495654	0.0925188	-0.00441379	0.507768	-0.0307375	0.195343	0.19131	-0.148018	0.106102	-0.149955	-0.12229	0.286285	0.108888	0.112729	0.0129669	-0.11881	-0.0636422	-0.0126534	0.0976105	0.113512	-0.245696	-0.220295	-0.120127	0.0418389	-0.130629	-0.15778	-0.111427	-0.1368	0.00535162	0.0250209	-0.0738702
ILMN_2105254	NM_152444	prostaglandin reductase 2 (PTGR2), mRNA.	PTGR2	0.00626174	1.10928	0.140468		0.28877	-0.0493784	0.170049	-0.138903	-0.185314	0.0353663	0.350111	-0.103062	0.0320645	0.0677831	0.264162	0.091144	0.193068	0.0612649	-0.111971	-0.15824	-0.293269	-0.0452842	-0.0467683	-0.0938943	-0.198443	-0.142561	0.0955291	0.0472074	-0.106092	-0.011145	0.0706608	0.130689	-0.228533	0.0150234	-0.158608
ILMN_1765021	NM_003935	topoisomerase (DNA) III beta (TOP3B), mRNA.	TOP3B	0.00529913	1.10914	0.13802		0.238809	0.309615	0.348409	-0.136267	-0.148651	0.089731	0.0633077	0.264602	0.0782661	0.103674	0.0963365	-0.0656842	0.0301662	-0.112476	-0.0690035	-0.00887114	0.153923	-0.052996	-0.0593545	0.0447778	0.072076	-0.041739	-0.264446	-0.113936	-0.033649	0.0213701	-0.28628	-0.109898	-0.0666344	-0.14594	-0.171617
ILMN_1766270	NM_001004756	olfactory receptor, family 51, subfamily M, member 1 (OR51M1), mRNA.	OR51M1	0.00182007	1.10697	0.116861		0.0490426	0.148005	0.107744	-0.0123376	0.14688	0.0839368	0.177928	0.0367874	0.136606	-0.069761	0.185315	0.304964	0.0428013	-0.147666	0.0126782	0.0256859	-0.0129836	-0.179261	0.0857668	-0.201656	-0.11056	-0.179629	-0.148015	0.124524	-0.0249023	0.0826629	-0.0140228	-0.00489942	-0.179434	-0.0122134	-0.310862
ILMN_1718813	NM_006314	connector enhancer of kinase suppressor of Ras 1 (CNKSR1), mRNA.	CNKSR1	0.00110803	1.10682	0.102555		0.0734236	0.166387	-0.122319	0.0349242	-0.0733278	0.0444097	0.155153	0.0200509	0.112034	-0.00337233	0.212939	0.25182	-0.00374022	0.230345	0.0131042	0.14071	0.0296743	-0.247523	0.0184012	-0.0320657	-0.112216	-0.0367149	0.0655397	-0.0515605	-0.0914504	-0.0302417	-0.145926	-0.197991	-0.143237	-0.0594234	-0.274095
ILMN_1776412	NM_198692	keratin associated protein 10-11 (KRTAP10-11), mRNA.	KRTAP10-11	0.00648814	1.10523	0.1411		0.032287	0.17689	-0.0771848	-0.0843509	0.0239269	0.0365214	0.335474	-0.066937	0.149003	0.300399	-0.0572434	0.226852	0.204188	-0.0562385	-0.078089	0.0850739	-0.14858	-0.171684	-0.17041	-0.0623513	-0.00833031	-0.0933519	0.0590667	-0.252441	-0.0433151	0.177064	0.0763228	-0.260096	0.0847318	-0.100318	-0.158538
ILMN_1784879	NM_153041	hypothetical protein FLJ32955 (FLJ32955), mRNA.	FLJ32955	0.00343196	1.10483	0.127602		-0.0579726	0.228122	-0.0428517	0.043243	0.00157821	0.0238464	-0.0983652	0.211729	0.0235089	0.0779747	0.202162	0.162504	0.228392	0.105833	0.179983	0.0558642	0.0520173	-0.130291	-0.0661039	-0.177483	-0.227007	-0.207014	-0.139786	0.0549628	-0.163273	0.210065	-0.0843878	-0.0168769	-0.0627558	-0.176971	-0.198506
ILMN_2191003	NM_001005922	keratin associated protein 5-1 (KRTAP5-1), mRNA.	KRTAP5-1	0.00788897	1.10428	0.148567		-0.0573229	0.135225	0.0821361	0.169393	-0.0454247	0.00532163	-0.0334232	-0.0975792	0.19045	-0.000706309	0.360977	0.329203	-0.175142	0.200071	-0.111896	-0.0334015	0.0439319	0.137913	0.0194569	-0.0654466	-0.153185	-0.155602	-0.0908289	0.164213	0.0326785	-0.0682591	-0.265995	-0.0868861	-0.0942793	-0.229393	-0.184898
ILMN_1702231	NM_024579	chromosome 1 open reading frame 54 (C1orf54), mRNA.	C1orf54	0.00726585	1.10416	0.145324		-0.023029	0.256947	-0.0419427	0.118297	-0.124699	0.103222	0.0406817	0.00693015	-0.0368723	0.0730607	0.215263	0.294903	0.0829732	0.161156	0.11313	0.13599	0.0851419	0.012256	0.0873899	-0.0906329	-0.0272686	-0.0301654	0.106241	-0.00749767	-0.250407	-0.240862	-0.143771	-0.12101	-0.38713	-0.162481	-0.140774
ILMN_1810423	NM_006638	ribonuclease P/MRP 40kDa subunit (RPP40), mRNA.	RPP40	0.00734116	1.10395	0.145598		0.0221179	0.171134	0.154493	-0.105092	0.245498	0.0300804	0.208601	0.164604	0.155049	0.265768	-0.110721	0.0879649	-0.239603	-0.0136861	0.161793	0.0526172	-0.0845702	-0.0118761	0.0016617	0.0279506	0.0119748	-0.0966082	-0.12561	-0.187083	-0.162906	-0.107575	-0.372961	-0.133603	-0.186652	-0.0270008	0.0732048
ILMN_1669338	NM_178033	cytochrome P450, family 4, subfamily X, polypeptide 1 (CYP4X1), mRNA.	CYP4X1	0.0049735	1.10255	0.135711		0.0267829	0.225872	-0.000908889	0.0900679	0.175012	0.130354	0.261738	-0.0987659	-0.0889898	0.015082	0.299941	-0.122711	0.00855701	0.140141	-0.0452591	0.160446	-0.181883	0.041618	-0.0723745	0.0388912	-0.0620388	-0.0456789	-0.0148526	-0.354657	-0.18603	0.0452545	0.0077265	-0.100562	-0.167022	-0.18756	0.0194549
ILMN_3248334	XM_001725861	PREDICTED: similar to mCG1031965 (LOC100133017), mRNA.	LOC100133017	0.00352762	1.10249	0.129261		-0.0686862	0.166735	0.0339072	0.0177025	0.00881718	0.0794531	0.164312	0.166438	0.0702392	0.288221	-0.0494514	0.223169	-0.165033	0.111643	-0.0378811	-0.0484154	0.00201758	-0.0684139	0.224836	0.0481348	-0.0579552	-0.0356837	-0.114187	-0.200024	-0.00648997	-0.175876	-0.139915	-0.157768	0.0335901	-0.342092	-0.0449671
ILMN_1694311	NM_198041	nudix (nucleoside diphosphate linked moiety X)-type motif 6 (NUDT6), transcript variant 2, mRNA.	NUDT6	0.00435211	1.10192	0.135342		-0.0307631	0.0159551	0.253768	0.00901014	-0.061119	-0.0139717	-0.039319	0.277778	0.160748	0.156366	-0.0140494	0.300896	-0.0541133	0.0600652	-0.101237	-0.0833094	-0.046397	-0.175911	-0.151258	-0.0499042	0.0161832	-0.0501231	-0.198493	-0.0326933	-0.0220966	0.328639	-0.13127	-0.135386	0.00302923	-0.16702	-0.142958
ILMN_1774945	NM_001010848	neuregulin 3 (NRG3), mRNA.	NRG3	0.00410705	1.1017	0.13262		0.14314	0.119056	0.126551	-0.062373	0.0650836	-0.0420192	0.322877	0.0492708	0.179001	0.0700822	0.147559	0.0302553	-0.150461	0.0676549	0.216136	0.0657131	-0.0621001	-0.16821	0.0388863	-0.115555	-0.247795	-0.198281	-0.165358	-0.0257861	-0.247795	-0.206033	0.0509321	0.038357	-0.0567994	0.0536849	-0.0512959
ILMN_3274973	XM_001715722	PREDICTED: similar to hCG2041551 (LOC100131688), mRNA.	LOC100131688	0.000544582	1.10166	0.0848223		-0.178445	0.0571975	0.175266	0.10798	0.0493851	-0.0183007	0.041112	0.0864522	0.105787	0.138411	0.1289	0.372618	-0.0432639	0.0613409	-0.00594486	-0.0790514	0.0465191	-0.0218505	-0.129247	-0.0461233	-0.0830285	-0.0265788	-0.260346	-0.13329	-0.163884	0.00162036	0.00956874	-0.0146164	-0.069749	-0.0282631	-0.0535124
ILMN_1754400	XR_001434	PREDICTED: AYP1 pseudogene 1 (AYP1p1), misc RNA.	AYP1p1	0.00590048	1.10159	0.13879		0.204184	0.0653149	0.0975143	0.0612131	-0.182438	-0.107868	0.143156	-0.138941	0.207828	0.210894	0.193153	0.202191	0.0598895	-0.00317301	-0.180849	0.0469308	0.0782735	-0.13144	0.137479	-0.159095	0.0831802	0.0153952	-0.228365	-0.0884394	-0.175932	0.122113	-0.0186573	-0.174442	-0.1232	-0.115277	-0.230584
ILMN_1671217	XM_496442	PREDICTED: similar to 40S ribosomal protein S15 (RIG protein) (LOC440733), mRNA.	LOC440733	0.00206143	1.10122	0.118502		-0.00634362	0.0832959	0.128474	0.186233	0.00309625	0.143503	0.186233	-0.0839879	0.0224332	0.259272	-0.0839879	0.0767841	0.00309625	0.00309625	-0.00234215	0.0648792	-0.205616	-0.212809	-0.171665	0.143503	-0.123514	-0.0505462	-0.224311	-0.205616	-0.00234215	-0.123514	-0.233233	0.0648792	-0.00234215	0.0224332	0.0159016
ILMN_1806633	XM_932781	PREDICTED: similar to CG7889-PA, transcript variant 2 (LOC653333), mRNA.	LOC653333	0.00721125	1.10121	0.14464		-0.114791	0.0908731	-0.0271651	0.0433015	-0.0792188	0.212564	-0.0439345	0.0306331	0.177914	0.289777	0.0995419	0.387506	-0.101939	0.151168	-0.0720415	0.26197	-0.0430275	-0.113482	-0.099248	-0.0712715	-0.00378719	0.0774922	-0.10014	-0.205294	-0.155231	-0.0127036	-0.115731	-0.187925	-0.180778	-0.0634901	0.0756134
ILMN_1843756	DB335527	DB335527 TESOP2 cDNA clone TESOP2008439 3, mRNA sequence	NaN	0.00465221	1.10097	0.135711		-0.193444	-0.0626063	0.17285	0.214999	0.145727	0.138367	0.106144	0.0255179	0.230668	-0.0866788	0.140322	0.194067	-0.0878823	0.13847	0.0166878	0.121629	0.0368465	-0.149275	-0.0434381	-0.0273157	-0.14237	-0.325291	-0.0664027	-0.0877783	-0.187491	0.00104719	-0.227477	0.0611766	-0.0716318	0.100175	-0.0610851
ILMN_1736533	NM_005440	Rho family GTPase 2 (RND2), mRNA.	RND2	0.000184463	1.10052	0.0638002		0.135442	-0.0280193	-0.102676	0.203743	0.052129	-0.093869	0.0898718	0.0421678	0.0665824	0.139121	0.144142	0.224478	0.129835	0.0786969	0.0849868	0.0559849	-0.0804035	-0.117112	-0.117022	-0.128227	-0.136745	-0.0748901	-0.0645979	-0.0305174	0.0370943	-0.0284595	0.0803404	-0.166779	-0.0972499	-0.129939	-0.12208
ILMN_1656495	XM_292889	PREDICTED: notochord homeobox (NOTO), mRNA.	NOTO	0.00773969	1.09908	0.147524		0.153479	-0.0200197	0.0975767	0.0238703	0.0721315	0.308977	0.193539	0.187314	-0.114121	0.0235056	0.00122823	0.10601	0.0744241	-0.0576379	-0.0136787	-0.0390235	-0.054642	-0.317057	0.17162	0.0276089	-0.159474	-0.0467988	0.0895582	0.134747	-0.304709	0.0107723	-0.15534	0.0415068	-0.0948057	-0.0345515	-0.297475
ILMN_1664096	NM_152356	zinc finger protein 491 (ZNF491), mRNA.	ZNF491	0.00175381	1.09861	0.116861		0.0619928	0.022043	0.0159973	-0.00055659	0.0831517	-0.00580391	-0.0603294	0.099862	0.161545	0.271929	0.177238	0.0999277	-0.0117395	0.101546	0.078315	0.0581912	-0.434724	-0.0560197	-0.125114	0.0755971	0.0575147	-0.0598365	-0.178028	-0.0640472	0.0145242	-0.0292889	-0.0902095	-0.0820303	-0.0916022	-0.00583925	-0.139363
ILMN_1686646	XM_938311	PREDICTED: hypothetical LOC285423 (LOC285423), mRNA.	LOC285423	0.0026768	1.09812	0.124049		-0.0347141	0.103433	0.0830051	0.1996	0.00539872	-0.00652628	-0.080064	0.0732115	-0.0755894	0.0492137	0.265462	0.233157	0.088074	0.132945	0.00012765	0.0829224	0.0841029	-0.130776	0.047783	-0.150717	-0.322612	-0.043732	-0.0891429	-0.13987	-0.0960197	-0.0525289	-0.0346244	-0.111943	0.163471	-0.0320939	-0.211245
ILMN_1882485	CF552129	AGENCOURT_15609033 NIH_MGC_183 cDNA clone IMAGE:30530585 5, mRNA sequence	NaN	0.00478563	1.09775	0.135711		0.0993269	0.24903	0.0450631	0.071999	-0.0302961	0.105503	0.118587	0.0604496	0.0754602	-0.00397302	0.0966543	0.273006	-0.124521	0.0425349	-0.0987455	-0.0533082	-0.00555758	-0.317891	-0.134325	0.0885378	-0.0966736	-0.250379	-0.065378	0.0594552	-0.142295	0.280678	-0.122917	0.0763092	-0.0383729	-0.11151	-0.0449811
ILMN_2384629	NM_198229	regulator of G-protein signaling 12 (RGS12), transcript variant 1, mRNA.	RGS12	0.00767196	1.09753	0.147417		0.020797	0.168361	0.0840957	-0.119306	0.0115823	0.0561021	0.11838	0.216465	0.120934	0.0651487	0.0523808	0.330603	0.0191516	-0.0428539	-0.220936	0.0602731	-0.0556788	-0.268008	-0.0417135	-0.0507465	-0.204844	-0.068056	-0.172209	-0.068847	-0.0358765	0.387351	-0.0235156	-0.0246859	-0.0502708	0.00693105	-0.113649
ILMN_3200056	XR_040783	PREDICTED: misc_RNA (LOC728208), miscRNA.	LOC728208	0.00379653	1.09716	0.131475		-0.104362	0.0449236	0.0708183	0.0147237	-0.054655	0.0589883	0.134978	-0.113975	0.0336271	0.373801	0.072551	0.410052	0.0710176	0.0212683	0.00181653	-0.134066	-0.0445211	-0.0210622	-0.119236	-0.0393323	-0.0874554	-0.0681571	-0.114021	-0.135091	-0.0729751	-0.214724	0.000494753	-0.101	0.130377	0.0537911	-0.053803
ILMN_1823486	AW135045	UI-H-BI1-abt-g-02-0-UI.s1 NCI_CGAP_Sub3 cDNA clone IMAGE:2713131 3, mRNA sequence	NaN	0.0035922	1.09693	0.129842		0.176513	-0.000669885	-0.0702744	0.0468378	-0.0518211	0.153038	0.0480863	0.214625	0.0499161	0.121268	-0.0826981	0.262038	0.031609	0.126402	-0.0487375	-0.0319611	0.0464272	-0.237574	-0.19667	0.109596	-0.162035	0.147551	0.0269585	0.0244805	-0.224245	0.0293885	-0.0282912	0.0161339	-0.0810489	-0.243218	-0.171396
ILMN_1729635	XM_939353	PREDICTED: similar to NADPH dependent diflavin oxidoreductase 1 (LOC650261), mRNA.	LOC650261	0.00831284	1.0964	0.149977		-0.0570916	0.102692	0.0879101	0.124171	0.220862	-0.110893	0.00674896	0.140193	0.127021	0.149261	0.382766	-0.0878157	-0.0552316	0.0110457	0.028748	0.147354	-0.151648	0.00134933	-0.0936841	0.0581338	-0.134779	-0.0988294	-0.0361073	-0.189939	-0.212076	0.00269449	-0.07417	-0.00620256	-0.305698	0.180257	-0.107706
ILMN_1906957	BC043534	Homo sapiens, clone IMAGE:5169349, mRNA	NaN	0.0056376	1.09573	0.13879		0.29279	-0.0446396	0.012279	-0.137697	-0.0529089	-0.0290512	0.219625	0.118003	-0.0403223	0.166298	-0.0129613	0.29664	-0.0344663	0.20391	-0.273288	0.0325608	-0.0497255	-0.057264	0.0186132	-0.127301	-0.00288625	0.000651194	0.0044324	-0.205806	-0.0776609	0.0960561	-0.0113557	-0.0102863	-0.233787	-0.151091	-0.0313432
ILMN_1766832	XM_376558	PREDICTED: similar to hypothetical gene supported by AK127120 (LOC653463), mRNA.	LOC653463	0.0072884	1.09513	0.145365		0.0485966	0.1734	0.0538839	0.0566948	-0.0239761	0.14961	0.0767177	-0.0690891	-0.0829142	0.107605	0.140192	0.156129	0.0256127	0.20733	-0.0675341	0.144966	-0.10329	-0.163944	0.0313088	-0.171003	-0.00537972	-0.0138121	-0.1206	-0.00966508	-0.130262	0.249313	-0.315901	0.066702	0.00438786	-0.039423	-0.346326
ILMN_1742846	NM_017594	DIRAS family, GTP-binding RAS-like 2 (DIRAS2), mRNA.	DIRAS2	0.00719474	1.09495	0.14464		0.111397	0.0398379	0.0244741	0.0627751	0.114745	0.106133	-0.0553457	0.0457933	0.0754661	0.101192	-0.0113944	0.512532	-0.0670214	0.00564292	-0.0670521	-0.0447401	-0.191071	-0.230329	0.12049	0.136562	-0.0836456	-0.0907796	-0.0830872	0.0248099	-0.118555	0.0366155	0.0204378	0.00779006	-0.0501216	-0.0244994	-0.292862
ILMN_2281486	NM_001298	cyclic nucleotide gated channel alpha 3 (CNGA3), transcript variant 1, mRNA.	CNGA3	0.000903024	1.09491	0.0955633		-0.00570764	0.0757076	0.226542	0.153813	-0.0799904	0.0134994	-0.0140994	0.0777319	0.156691	0.12292	0.103496	0.00893783	0.0608888	0.145525	-0.0827419	-0.127395	0.111053	-0.0627347	0.00942109	-0.104252	0.0751392	0.114632	0.00620311	-0.0783517	-0.0594127	0.0700958	-0.199651	-0.217951	-0.0410668	-0.209757	-0.156942
ILMN_1873592	NM_173598	kinase suppressor of ras 2 (KSR2), mRNA.	KSR2	0.00292668	1.09455	0.124909		0.121834	0.0197437	0.111058	-0.0207613	-0.0127667	0.182406	0.259386	0.127962	0.147563	0.0237908	-0.0251873	-0.048966	0.156376	-0.00907129	-0.152515	0.11636	-0.0214965	-0.211601	0.13235	-0.0885161	-0.161904	-0.0128712	-0.317841	-0.0280064	0.113406	0.0360926	0.00902834	-0.0723812	-0.0704898	-0.0549187	-0.175649
ILMN_3286067	XR_019645	PREDICTED: misc_RNA (LOC391578), miscRNA.	LOC391578	0.00588637	1.0944	0.13879		-0.165225	0.0325259	0.132559	-0.0875643	0.0384976	0.0785284	0.183177	-0.0452288	0.154118	0.300197	0.146002	0.103892	0.0366444	0.142058	-0.111061	0.0487838	0.0985986	-0.0481578	0.0932133	-0.212775	-0.146104	-0.134431	-0.0783716	-0.113933	-0.224926	0.110665	-0.129793	-0.142977	0.139658	-0.165638	0.0801892
ILMN_3235231	NR_002979	small nucleolar RNA, H/ACA box 49 (SNORA49), small nucleolar RNA.	SNORA49	0.00230399	1.09433	0.118516		0.115022	-0.0303529	-0.0623064	0.0928184	-0.0344979	0.137024	-0.00977295	-0.00427328	0.00878006	0.249425	-0.0124352	0.371158	0.0424782	0.0688503	-0.183245	0.174129	-0.0230006	-0.0856153	0.0192407	0.0188136	-0.130376	0.0309106	-0.0675031	-0.108758	-0.16949	-0.0198388	-0.124452	-0.0347288	-0.218338	-0.107111	-0.0498814
ILMN_1691194	XM_939535	PREDICTED: hypothetical protein FLJ36032 (FLJ36032), mRNA.	FLJ36032	0.00794689	1.09397	0.148824		0.0144821	0.189746	0.124085	-0.0515152	-0.0618141	0.173704	-0.0772839	0.0601665	0.0921135	0.291534	0.0759806	0.163988	-0.0708491	0.0715414	0.0819264	0.16988	0.100257	-0.0875967	-0.227748	-0.205882	-0.191357	0.158908	-0.2168	-0.0430338	-0.255221	-0.0125378	-0.168155	-0.0411744	-0.0112846	-0.0177976	-0.0258473
ILMN_1878670	BX474196	DKFZp686A12168_r1 686 (synonym: hlcc3) cDNA clone DKFZp686A12168 5, mRNA sequence	NaN	0.00830355	1.09358	0.149977		0.208104	0.00247665	0.00172782	0.145421	0.0608166	0.242904	0.0296337	0.197124	0.133815	-0.144288	-0.109325	0.346486	-0.059455	-0.0375599	0.0356867	-0.00901854	0.00204144	-0.127822	-0.00202689	-0.0972917	-0.238753	0.0767434	-0.206421	-0.0742763	-0.201336	-0.11728	0.0597692	0.133956	0.0301617	-0.173893	-0.0482502
ILMN_1723092	NM_139161	crumbs homolog 3 (Drosophila) (CRB3), transcript variant 2, mRNA.	CRB3	0.00386997	1.09358	0.131475		0.144042	0.266468	0.130017	0.0964903	0.0193748	0.0622079	0.00587896	-0.0646035	0.105291	-0.0687744	-0.0279221	0.298661	0.0235765	-0.07133	-0.0273556	0.193868	-0.232464	0.00554511	-0.14981	-0.0942868	-0.0508829	0.0760221	-0.138061	0.0306487	-0.0397602	-0.0928704	-0.166785	-0.0417609	-0.121654	0.0171016	-0.245042
ILMN_1692831	NM_005325	histone 1, H1a (HIST1H1A), mRNA.	HIST1H1A	0.0081828	1.09244	0.149919		0.259641	0.0588144	0.0526308	0.198934	-0.00021216	-0.218036	0.129677	-0.0722905	0.00265444	0.108302	0.153252	0.299466	-0.0889129	0.198195	-0.0533547	-0.0394613	-0.11667	0.040104	-0.0194251	-0.069416	-0.169564	-0.132717	-0.0681218	-0.0340584	-0.133857	0.232618	-0.018167	-0.0633182	0.0973576	-0.0778059	-0.228598
ILMN_1872472	BF336512	RC2-CT0522-150900-012-g04 CT0522 cDNA, mRNA sequence	NaN	0.00135977	1.09239	0.108553		0.106646	0.142725	0.121102	0.0971984	0.231953	0.180512	-0.0196806	-0.0305121	0.138295	0.194797	-0.0320668	0.0747169	-0.117164	-0.0676852	-0.0365589	0.112976	-0.0446654	-0.0790064	-0.096607	-0.039455	-0.0896146	0.038956	-0.0405768	-0.173204	-0.160339	-0.120748	-0.243708	0.0335538	-0.0674435	0.0885064	-0.00974235
ILMN_3235416	NM_138294	prostate and testis expressed 1 (PATE1), mRNA.	PATE1	0.00300461	1.09173	0.124909		0.150549	0.0687587	0.0243821	-0.0600943	0.100787	0.0662936	-0.0503021	0.163262	0.174417	0.212801	-0.121773	0.0403282	0.196244	0.0120768	-0.181044	-0.0585772	0.0748608	-0.0218796	-0.0400393	0.09319	0.0409624	-0.0683822	-0.14372	-0.31029	-0.0954854	-0.0272142	-0.059583	-0.194304	0.109771	-0.127451	0.0438457
ILMN_1762033	NM_198990	N-acyl phosphatidylethanolamine phospholipase D (NAPEPLD), mRNA.	NAPEPLD	0.00113776	1.09132	0.102555		0.124966	-0.0412477	0.232293	0.152705	0.0639866	0.0859717	0.204436	0.174492	-0.0375135	-0.0861433	0.123775	-0.140862	-0.00345561	0.115276	-0.142	0.0224486	-0.0721518	-0.169282	-0.0624175	-0.0319554	0.0222647	0.115892	-0.114815	-0.0161187	0.0533237	-0.148014	-0.0347865	-0.163327	-0.0986279	-0.0798637	-0.047499
ILMN_1662880	NM_175616	FIS (FIS), mRNA.	FIS	0.00458663	1.09092	0.135711		0.0878964	0.0142098	-0.0159394	0.0504885	0.0898441	0.00751919	0.0867079	0.0496267	0.00312655	0.0866735	0.0524018	0.337623	0.016378	0.129176	0.118531	-0.017692	-0.103922	0.036826	-0.230905	-0.234909	-0.160402	-0.0169369	0.041812	0.120846	-0.248091	-0.0445619	-0.101255	0.163705	0.000828741	-0.207901	-0.0411756
ILMN_1790253	NM_198924	tripartite motif-containing 73 (TRIM73), mRNA.	TRIM73	0.00568835	1.0896	0.13879		0.182368	0.0445743	0.0435167	-0.00344428	0.0280809	0.030206	0.183041	0.0182118	0.144993	-0.0164411	-0.22014	0.296645	0.0119621	0.161554	-0.127735	-0.0146917	0.0625514	0.105323	0.121425	-0.0716837	-0.151363	0.0978781	-0.127785	0.0352774	-0.0661683	-0.132762	-0.241481	-0.146673	-0.104582	-0.12876	-0.114206
ILMN_1894653	BU569300	AGENCOURT_10359846 NIH_MGC_82 cDNA clone IMAGE:6616699 5, mRNA sequence	NaN	0.00585749	1.08933	0.13879		0.0538138	0.0578104	0.0258164	-0.00335951	0.211334	0.199959	0.0331219	-0.107118	0.073454	0.086429	0.125571	0.0659689	0.0447653	0.0580304	0.040458	0.177907	-0.0393473	0.00270276	-0.0714069	-0.225077	-0.100924	-0.0904697	-0.236891	0.130178	-0.256607	0.0118754	-0.0692484	-0.0519577	0.149345	-0.0710209	-0.273999
ILMN_1893228	BX118370	BX118370 Soares_NFL_T_GBC_S1 cDNA clone IMAGp998P183859, mRNA sequence	NaN	0.00665981	1.08921	0.14159		-0.0512921	0.13532	0.0801844	-0.0458396	0.103638	0.0672953	0.179675	0.0881555	-0.0843485	0.266329	-0.0186235	0.0797019	0.0596031	0.0173057	-0.00828257	-0.243035	-0.12639	0.0941406	-0.15861	-0.0164888	-0.349964	0.117253	0.0923937	-0.1765	-0.152906	-0.0104495	0.0724396	0.0402319	0.0126414	-0.0896722	-0.12752
ILMN_3166414	DQ855000	Synthetic construct clone AG011.0011 external RNA control sequence	ERCC-00137	0.00311964	1.08916	0.124909		-0.0603338	-0.082944	0.0972838	0.0693564	-0.0649327	-0.119602	0.284589	0.150272	-0.0242814	0.191901	0.0455576	0.200864	0.109215	0.117984	-0.0201197	-0.0851578	-0.0171957	-0.080567	0.0611743	-0.234361	-0.179061	-0.0248375	-0.0142727	0.02	-0.164391	-0.0599332	-0.135346	0.133922	-0.0611146	-0.110443	-0.0120507
ILMN_1718030	XM_376444	PREDICTED: hypothetical protein LOC133491 (LOC133491), mRNA.	LOC133491	0.00391615	1.0889	0.131475		0.0646925	0.145086	0.111942	0.0155735	0.0223929	0.197943	0.356762	-0.0222417	-0.0918298	0.105582	-0.0987753	0.0281271	0.190867	-0.0208514	-0.109783	-0.0511794	-0.0142465	-0.0877911	-0.111997	-0.1876	0.0136092	-0.177363	-0.119764	-0.108513	-0.117625	0.18549	-0.0239482	0.0577552	-0.0658886	0.0148447	0.0358762
ILMN_2125880	NM_032838	zinc finger protein 566 (ZNF566), mRNA.	ZNF566	0.00112102	1.08882	0.102555		-0.0946467	0.0442072	0.142715	0.0584284	-0.00826171	-0.0496087	-0.032496	0.0567471	0.121753	-0.0440609	0.143819	0.184811	0.164659	0.202718	0.0296065	0.0453102	-0.101402	0.055059	0.0343647	-0.178735	-0.239469	-0.107469	-0.111719	-0.0621038	-0.104981	-0.0644657	0.0409862	-0.122304	-0.123725	0.0722512	-0.066466
ILMN_1659905	NM_021939	FK506 binding protein 10, 65 kDa (FKBP10), mRNA.	FKBP10	0.00571413	1.08872	0.13879		0.206676	0.0769383	-0.171888	0.127917	0.144152	0.0501857	0.0957589	0.055525	-0.0175659	0.0654187	0.00199046	0.21417	0.0444903	0.123097	0.0896564	0.17172	0.0690938	-0.0230433	-0.0882284	-0.267891	-0.210804	0.00677497	0.0407371	-0.0510848	-0.0502819	-0.158877	-0.0623249	-0.0127574	0.0169067	-0.0179325	-0.301619
ILMN_1787973	XM_942127	PREDICTED: similar to Fc fragment of IgG binding protein (LOC652599), mRNA.	LOC652599	0.00690104	1.08635	0.142262		0.129124	0.192793	0.0301562	-0.0850812	0.0694369	0.134728	0.134068	0.0375047	0.0658036	-0.0093962	0.083603	-0.0321143	0.143152	0.0590865	-0.0683037	0.0696817	-0.153441	0.186066	-0.105634	-0.000743359	-0.279802	0.0561587	0.0188904	-0.169892	0.0313986	0.144677	-0.0776384	-0.258685	-0.22495	-0.0881969	0.0460707
ILMN_1790688	XM_001132404	PREDICTED: chromosome 14 open reading frame 78 (C14orf78), mRNA.	C14orf78	0.00361355	1.08352	0.129842		0.134877	0.087077	-0.0331709	0.0411824	0.0665564	0.122327	0.141667	0.0224963	-0.0201818	0.0502733	-0.0165603	0.301842	-0.0246877	0.0603782	-0.123392	-0.0201818	0.067166	-0.0372614	0.02532	-0.0809468	-0.1354	0.1227	-0.0702906	-0.0281946	-0.120618	-0.262331	0.168453	-0.00191362	-0.0093588	-0.151081	-0.17586
ILMN_1685813	XM_939379	PREDICTED: similar to unc-93 homolog B1 (LOC650293), mRNA.	LOC650293	0.00616989	1.08344	0.140468		0.126644	0.0105598	0.00984838	-0.069732	-0.0561677	0.225432	-0.0652221	-0.0207967	-0.0209859	0.094669	0.252808	0.21811	0.121668	0.0281655	-0.000418843	-0.148722	0.0281366	-0.0499156	-0.0734504	-0.0777065	-0.100634	-0.328044	0.146926	-0.100808	-0.0444343	0.12096	-0.0240265	-0.0155933	-0.118158	-0.0694436	-0.0720878
ILMN_1758678	XM_925881	PREDICTED: hypothetical protein LOC642348 (LOC642348), mRNA.	LOC642348	0.00173333	1.08256	0.116861		0.15928	0.056792	0.0901179	0.209801	-0.033577	0.139587	0.0325328	0.118945	-0.0365463	-0.0463051	0.145247	0.0101446	0.0565023	0.0200998	-0.00736708	-0.026541	-0.104778	-0.0313733	-0.128378	-0.0888849	-0.0154314	-0.149832	0.139035	-0.077716	-0.18192	0.141145	0.0381591	-0.126425	-0.0366236	-0.206253	0.0378264
ILMN_1890063	AI086279	oz40h01.s1 Soares_NhHMPu_S1 cDNA clone IMAGE:1677841 3, mRNA sequence	NaN	0.00463989	1.08149	0.135711		0.0535578	0.0797038	-0.0157865	0.0357166	0.031397	0.110777	0.0371335	-0.0711559	0.108079	-0.027041	0.149962	0.153481	-0.0690819	0.0813834	0.0357027	0.00917357	0.0298814	-0.230152	-0.0975126	-0.0483674	0.0697701	-0.324424	-0.0337972	0.111991	-0.0755279	-0.102659	-0.290335	-0.0739224	-0.0842766	0.0281732	-0.0458504
ILMN_3238845	NM_058182	family with sequence similarity 165, member B (FAM165B), mRNA.	FAM165B	0.00794936	1.08129	0.148824		0.0302608	0.0450292	0.0542797	0.00124831	0.123415	-0.0255503	0.186854	-0.0680983	0.252729	0.222506	0.121706	0.0769901	-0.047678	-0.195838	0.0262958	0.0467528	0.0737452	0.0472937	0.0218019	-0.0198815	0.0328057	-0.0274421	-0.0376849	-0.12993	-0.0145751	-0.091848	-0.156481	-0.242814	-0.213787	-0.160931	-0.125597
ILMN_1837298	AI961498	wt23e07.x1 NCI_CGAP_Ut1 cDNA clone IMAGE:2508324 3, mRNA sequence	NaN	0.00186257	1.08109	0.116861		0.0538577	0.11631	0.0854802	0.062191	0.112867	0.000702164	-0.0511865	-0.0106068	-0.0184911	0.22186	-0.048591	0.0750586	0.230653	0.000944009	-0.0934186	0.00958262	-0.147527	-0.187564	-0.071358	-0.0674629	-0.0735018	0.0228042	0.0658356	-0.099275	-0.132521	0.0214606	-0.224762	0.0706383	-0.0247208	-0.0687745	0.0973439
ILMN_2134555	NM_016121	potassium channel tetramerisation domain containing 3 (KCTD3), mRNA.	KCTD3	0.00523118	1.08092	0.137119		0.0855334	0.0826177	0.076748	-0.112846	0.0491601	0.107514	0.168183	0.132573	-0.0784994	0.111256	0.0936759	0.108303	0.127047	-0.0508386	-0.122463	-0.0136152	-0.0972622	0.235415	-0.116889	0.1236	0.0740866	-0.0527734	-0.114363	-0.139112	-0.167395	-0.0638516	-0.041181	-0.0211895	-0.1743	-0.188916	0.0651522
ILMN_3283114	XR_037063	PREDICTED: misc_RNA (LOC100131460), miscRNA.	LOC100131460	0.000745643	1.08063	0.0932123		-0.0477691	0.144463	0.0701984	0.150927	0.103684	0.107151	0.12675	-0.0930898	0.0446518	0.191149	0.123227	0.0576758	-0.115431	-0.0258608	-0.112795	-0.103835	0.0195381	-0.076538	0.00960265	-0.112641	-0.0355381	-0.0558393	0.00116322	0.0303675	-0.0775417	-0.147158	-0.211228	-0.0113108	0.0404748	-0.00216802	-0.0391025
ILMN_1705049	NM_153704	transmembrane protein 67 (TMEM67), mRNA.	TMEM67	0.00562703	1.07821	0.13879		0.0727498	0.033648	0.201015	0.165781	0.0973993	0.0499041	0.137225	0.271582	0.0684644	0.0155065	-0.0197662	0.000104261	-0.115246	-0.0622954	-0.0595024	-0.153544	0.0112473	-0.00293497	0.0161188	-0.0734599	0.0593178	0.193323	-0.118528	-0.150738	-0.07015	0.0151127	-0.230862	-0.0887446	0.0305633	-0.0547793	-0.0568578
ILMN_1703886	NM_006517	solute carrier family 16, member 2 (monocarboxylic acid transporter 8) (SLC16A2), mRNA.	SLC16A2	0.00588404	1.07811	0.13879		0.144095	-0.00439826	0.163032	0.0348937	0.0396985	0.0112072	0.0820312	-0.106293	-0.023363	-0.106336	0.0175582	0.281799	0.0866443	0.107095	-0.143077	0.154667	0.128808	-0.125906	-0.133433	-0.132471	-0.241664	-0.0301595	-0.0665641	-0.032405	-0.0971333	0.0235459	-0.0681887	-0.0641166	0.0228484	-0.10525	-0.0504818
ILMN_3235143	NR_024441	hypothetical protein LOC731779 (LOC731779), non-coding RNA.	LOC731779	0.00629997	1.07771	0.140468		0.111463	-0.0204194	0.242558	0.0714179	0.0201024	0.0214353	-0.108494	0.145028	0.0209687	0.094632	0.164302	-0.13123	0.0971488	0.0666759	-0.0699106	0.0117206	-0.154362	0.0702001	-0.131161	0.0520777	0.0244959	0.110387	-0.137231	-0.0564256	-0.0269949	-0.303742	-0.104185	-0.0864485	-0.097573	-0.00848168	0.0383432
ILMN_1775490	XM_942287	PREDICTED: similar to CG6723-PA (LOC652684), mRNA.	LOC652684	0.00796631	1.07297	0.148824		0.0246959	-0.0247073	0.0559208	0.0306903	-0.0145361	-0.0513552	-0.00506803	-0.000228236	0.302983	0.0344241	0.163672	0.165084	0.0779996	0.0500689	-0.351103	-0.15603	-0.0766153	0.0620864	0.0764858	0.0499299	-0.0124984	-0.0685361	0.0265864	-0.0055061	-0.0206815	-0.0526253	0.0410727	-0.0340516	-0.114527	-0.0881841	-0.0199873
ILMN_1749317	NM_001003808	chromosome 1 open reading frame 222 (C1orf222), mRNA.	C1orf222	0.00256612	1.07196	0.124049		0.0571986	0.00934261	0.121616	0.0480622	-0.0449096	-0.0887709	0.156504	0.0233084	0.0163355	0.110222	0.120606	0.231772	-0.0474477	0.10722	-0.0601272	-0.0708532	-0.0226278	0.0242221	-0.151883	-0.0604402	-0.17247	0.0895044	-0.140632	0.0353379	-0.120267	0.0339777	0.0676793	-0.0316383	-0.0258861	0.0235807	-0.124833
ILMN_1711845	NR_003266	succinate dehydrogenase complex, subunit A, flavoprotein pseudogene (LOC220729) on chromosome 3.	LOC220729	0.000848408	1.06963	0.095484		0.017652	0.0743268	0.080027	0.150705	0.0890922	0.0889136	-0.125496	0.024288	0.171089	-0.109623	0.109863	0.0153639	0.00926781	0.153274	-0.0305224	0.00352986	-0.0897142	-0.138836	-0.14571	-0.0738331	-0.0458694	0.0236931	0.0556526	-0.0346639	-0.0599737	-0.0746489	0.00177356	-0.0451007	0.0126808	-0.0232196	-0.0769669
ILMN_1771113	NM_138281	distal-less homeobox 4 (DLX4), transcript variant 1, mRNA.	DLX4	0.00659627	1.06925	0.141258		-0.121459	0.156829	0.126635	0.0863731	0.0644109	0.184634	0.0134782	0.0202482	0.0612162	0.0279865	0.0888269	0.103602	-0.14979	0.0855445	-0.0457551	0.0322676	0.0272861	-0.194906	-0.0628752	-0.0633833	-0.0466472	0.0619647	0.00473875	0.134602	-0.0166062	-0.209344	0.0103175	-0.107101	-0.15715	-0.0417556	-0.0588064
ILMN_1665417	XM_927455	PREDICTED: similar to splicing coactivator subunit SRm300 (LOC644276), mRNA.	LOC644276	0.00523064	1.06862	0.137119		0.0546394	-0.00063133	-0.0550076	0.000634253	-0.112892	0.0329303	0.118343	0.119061	0.062186	0.061199	0.221239	0.200343	-0.00665559	0.0754449	-0.0446186	-0.0225122	-0.0981101	-0.0541008	-0.0876314	-0.0687711	-0.0774094	-0.0951885	0.0436401	0.075901	0.0399756	0.0938693	-0.0824282	-0.169022	0.115144	-0.150457	-0.11011
ILMN_1863979	CB049834	NISC_gj13d12.x1 NCI_CGAP_Pr28 cDNA clone IMAGE:3271726 3, mRNA sequence	NaN	0.00505607	1.06624	0.135711		0.14638	0.0380497	0.127388	0.0950607	-0.0562235	0.0905153	-0.0198937	0.0315024	0.165904	0.123026	0.0929802	-0.0866994	0.0761509	-0.0606395	-0.0879775	-0.0106027	-0.0857203	0.105022	0.105698	-0.126168	-0.00816578	-0.115496	0.0251272	-0.189581	-0.0493653	-0.0628369	-0.154443	0.0821487	0.0119687	-0.0363678	-0.0492564
ILMN_1893033	BE646244	7e83f02.x1 NCI_CGAP_Pr28 cDNA clone IMAGE:3289083 3, mRNA sequence	NaN	0.00393953	1.06612	0.131475		0.22317	0.110921	-0.060932	0.0296968	0.102175	-0.0310708	0.0786677	-0.00911741	0.242414	0.0690962	0.0527079	0.0787479	-0.0321145	-0.101304	0.0547298	-0.0155956	-0.0470735	0.034832	0.0172154	-0.13062	-0.00654842	0.0130992	-0.113307	-0.175951	-0.00120277	0.0165085	-0.083909	-0.0574218	-0.0688219	-0.0885146	-0.00337544
ILMN_1833695	DB338438	DB338438 TESTI2 cDNA clone TESTI2038389 3, mRNA sequence	NaN	0.00821503	1.0639	0.149955		0.0392387	0.121579	0.00208227	0.0228945	-0.012765	0.0360683	-0.0606304	-0.0356863	0.0365393	0.307769	0.152049	0.0260938	-0.00875408	0.0691652	-0.0850868	-0.023332	-0.0482482	-0.118499	-0.104987	0.0922776	0.0268124	-0.0928809	0.0066593	-0.00843507	0.0369484	0.0789443	0.00700406	-0.139841	-0.0330282	-0.225576	-0.0432224
ILMN_1658422	XM_926591	PREDICTED: similar to fumarylacetoacetate hydrolase domain containing 2A (LOC653242), mRNA.	LOC653242	0.00515835	-1.05983	0.136472		0.00741878	-0.245786	0.0692367	-0.100073	-0.0561565	0.0370865	-0.0936736	-0.117897	-0.134527	0.0238592	0.0342329	-0.000859386	-0.12084	0.02584	0.0401195	-0.0411151	0.0860621	0.0270311	0.146079	0.0550658	-0.0861998	0.0668633	0.00736252	0.0302766	-0.0768547	0.0214656	-0.0105725	0.0552489	0.103856	0.118856	0.0653361
ILMN_2219681	NM_004164	retinol binding protein 2, cellular (RBP2), mRNA.	RBP2	0.00507725	-1.06673	0.135711		0.110876	0.0212735	-0.229975	-0.01294	0.0712816	-0.137505	-0.11078	-0.0340504	-0.197387	-0.0122713	0.00505346	-0.0153294	-0.184952	0.00177217	0.0420807	-0.0388775	0.152968	0.176301	0.0439565	0.0613024	0.0549055	-0.0470414	0.0842114	0.0556368	-0.0728325	-0.0283238	0.0422094	0.0638707	0.062172	-0.0202442	0.071796
ILMN_1660017	NM_001017529	proline rich 5 (renal) (PRR5), transcript variant 5, mRNA.	PRR5	0.00828919	-1.07127	0.149977		0.0321823	-0.0523742	0.0814134	0.0718095	-0.107695	0.0116795	-0.104922	-0.169752	-0.0967793	-0.106918	-0.0563273	-0.00528251	-0.0622584	-0.0602643	0.0751336	0.0546463	0.0609515	0.0681337	0.079835	0.250627	0.058223	0.295755	0.0925346	0.0430381	-0.105682	-0.0336448	0.00988481	-0.00636352	0.150217	-0.176199	0.0119707
ILMN_1744129	NM_020892	deltex homolog 2 (Drosophila) (DTX2), mRNA.	DTX2	0.00169516	-1.07166	0.116692		0.0270637	-0.0209922	-0.0592958	-0.112853	-0.0121344	-0.148021	0.045247	-0.0189336	0.011265	-0.0787186	-0.114223	-0.163439	0.00629442	-0.0856533	-0.07571	-0.0692943	0.0743606	0.251332	0.0169743	-0.00588055	0.101517	0.157162	0.031099	-0.0233058	0.144935	0.103052	-0.0755576	0.0120747	0.0370377	0.033751	0.104173
ILMN_1712560	NM_004630	splicing factor 1 (SF1), transcript variant 1, mRNA.	SF1	0.00731907	-1.07193	0.14537		-0.14102	-0.0424447	-0.0662802	-0.0363764	0.0409575	-0.0335486	-0.113973	-0.0286607	-0.101381	-0.110943	-0.0525878	-0.148635	0.0361936	-0.0239824	-0.0103105	-0.000620928	0.256143	0.189242	-0.0494529	-0.153425	0.104497	0.187758	0.0702472	0.0301351	0.0828073	-0.217594	0.0406066	0.00808315	-0.00190468	0.0437208	0.124672
ILMN_1724884	NR_000008	small nucleolar RNA, C/D box 22 (SNORD22), small nucleolar RNA.	SNORD22	6.84402e-05	-1.07604	0.0419519		0.0393183	-0.0247063	-0.127072	-0.175379	-0.0143793	-0.0345235	-0.0537344	-0.0718033	-0.160163	0.0276692	-0.0176888	-0.0514504	-0.0646121	-0.0524149	0.0019012	0.162814	-0.00595078	0.0254015	0.167655	0.0435163	0.0571839	0.0582306	-0.0526138	0.113917	-0.000949974	0.101973	0.0113909	-0.0352228	0.0335969	0.0959967	0.0703403
ILMN_2409793	NM_001042539	MYC-associated zinc finger protein (purine-binding transcription factor) (MAZ), transcript variant 2, mRNA.	MAZ	0.00651177	-1.07838	0.1411		0.0475336	-0.0889429	-0.107888	0.0140008	0.0500473	0.00583253	-0.173091	0.0213024	-0.203232	-0.24751	-0.137334	-0.0925668	0.00438864	0.0228537	0.165548	-0.0071641	0.184998	0.189782	-0.0458289	0.115329	0.0603006	0.063575	0.0800611	-0.0353548	0.139214	-0.101054	0.0400496	-0.19065	-0.0486564	0.0653277	0.101095
ILMN_3247681	NM_001013649	chromosome 2 open reading frame 68 (C2orf68), mRNA.	C2orf68	0.00162311	-1.0797	0.115688		-0.154244	-0.0828125	-0.0644298	0.0692848	0.0854477	0.0793123	-0.222679	-0.134397	-0.146708	-0.016188	-0.065095	-0.107064	-0.0138661	-0.0908987	-0.0202155	-0.0532389	0.165477	0.0150244	0.0103558	0.0753662	0.0776937	-0.050337	0.077955	0.112664	0.0627733	0.193035	-0.0976291	0.0353489	0.179105	-0.0181261	0.0658239
ILMN_1657405	NM_139015	signal peptide peptidase 3 (SPPL3), mRNA.	SPPL3	0.00388622	-1.07978	0.131475		0.116734	-0.0520978	-0.178164	-0.113167	-0.0806861	-0.0182588	-0.158532	-0.161705	-0.0675096	0.0265228	-0.200633	0.116808	-0.0898855	0.0894613	-0.0567626	0.144197	-0.0755159	0.107632	-0.095875	0.123022	0.00988164	0.0418046	-0.0108399	0.186567	0.0503834	0.183251	0.120607	0.0610032	-0.0293211	0.133118	0.053119
ILMN_1714335	NM_172037	retinol dehydrogenase 10 (all-trans) (RDH10), mRNA.	RDH10	0.00788165	-1.08036	0.148567		0.0467066	-0.0485649	0.0935011	-0.233742	0.0497836	0.0117908	-0.19995	0.0965237	-0.0657153	-0.276456	0.0191697	-0.280857	-0.0580167	0.072968	0.0280339	0.00727912	0.16741	-0.000685407	-0.0273514	0.00161318	0.0592745	0.0683173	0.0111626	-0.00533006	0.136566	-0.0678735	0.117478	0.0669751	0.030582	0.156839	0.206835
ILMN_1792353	NM_024947	polyhomeotic homolog 3 (Drosophila) (PHC3), mRNA.	PHC3	0.00406237	-1.08455	0.13243		-0.140843	-0.0403681	0.0359754	0.00534353	-0.121505	0.0652766	-0.12794	-0.0782826	-0.196096	-0.0772028	0.0418653	-0.202038	0.0395336	-0.13997	0.107991	0.0497574	-0.0876983	0.024745	-0.0577315	0.0977776	0.117768	-0.0771564	-0.0711338	0.219423	0.0961009	-0.166124	0.108349	-0.0220545	0.176777	0.192021	0.144948
ILMN_3236634	XR_015885	PREDICTED: misc_RNA (LOC728889), miscRNA.	LOC728889	0.00815362	-1.08517	0.149772		0.106626	-0.120995	-0.101906	-0.000861687	0.0569612	-0.0267868	-0.0261718	-0.0628654	-0.0689187	-0.0160912	-0.133443	-0.297305	-0.134822	-0.0787617	0.157713	0.0747988	0.0978986	-0.187395	0.0931429	0.0826495	0.00542822	0.238068	-0.0827258	-0.0261607	-0.150304	-0.020946	0.14631	0.0793835	-0.0456648	0.266215	0.176936
ILMN_1802761	XM_001127580	PREDICTED: similar to CG17293-PA (LOC728505), mRNA.	LOC728505	0.00517408	-1.08562	0.136633		-0.0848502	-0.153433	-0.15227	-0.0285492	0.0120697	-0.114047	-0.0217673	-0.128744	-0.0393706	-0.055724	-0.128209	-0.258275	0.00320276	0.176485	0.0403493	-0.0563141	-0.0549125	0.107089	-0.160626	0.0852031	0.0827026	0.178953	0.147399	0.125601	0.160143	0.0904453	-0.0113389	-0.0851595	-0.147458	0.15599	0.174766
ILMN_1809751	NM_024852	eukaryotic translation initiation factor 2C, 3 (EIF2C3), transcript variant 1, mRNA.	EIF2C3	0.00210585	-1.08725	0.118502		-0.0919804	-0.100429	-0.0509637	0.0420304	-0.0604031	-0.144789	-0.238312	-0.297589	-0.0675133	0.0451372	0.0701829	0.0857048	-0.0168959	-0.0480114	-0.137956	0.109567	0.13924	-0.00323115	0.0643856	0.00921146	0.0185477	0.20048	0.118385	0.0599245	0.0536837	-0.0299035	0.0445399	0.0288753	0.239134	0.0762838	-0.000535025
ILMN_1678075	NM_170751	chromodomain protein, Y-like (CDYL), transcript variant 2, mRNA.	CDYL	0.00757603	-1.08754	0.146767		-0.170375	-0.105377	0.0342145	-0.195008	0.0854565	-0.0580704	-0.0129412	0.0751856	0.0656823	-0.0979038	-0.130811	-0.203053	-0.0734159	-0.115525	0.195785	0.0889284	-0.133522	-0.0321733	0.107847	0.176448	0.0956996	0.174241	-0.0402277	0.0571923	0.102867	0.0653897	0.296568	-0.222501	-0.0880059	0.0947188	0.0236133
ILMN_1720238	XM_210642	PREDICTED: similar to Transcription initiation factor TFIID subunit 11 (Transcription initiation factor TFIID 28 kDa subunit) (TAF(II)28) (TAFII-28) (TAFII28) (TFIID subunit p30-beta) (LOC285697), mRNA.	LOC285697	0.00471696	-1.08788	0.135711		-0.0335094	-0.0670865	-0.281976	-0.0267267	0.0225323	-0.204695	-0.0342262	-0.0483987	-0.0800109	-0.115372	0.0402302	-0.095982	-0.120188	0.158962	-0.0430658	0.0354556	0.147471	0.0472526	-0.111237	-0.103648	0.0156268	0.21309	0.0911161	0.0754098	-0.0826488	0.33836	0.0483557	0.117727	0.0513676	0.0472206	0.101688
ILMN_3187254	XR_037331	PREDICTED: misc_RNA (LOC100128016), miscRNA.	LOC100128016	0.00107218	-1.08844	0.100197		-0.150116	0.0676558	-0.12908	-0.023914	-0.101343	-0.0254719	-0.136268	-0.023914	-0.17838	-0.166649	-0.195792	0.00931565	0.102554	0.0443261	0.0957377	-0.0155603	0.163799	0.135062	0.128088	-0.0388002	-0.108799	-0.0124913	-0.0931048	0.0817987	0.155947	0.141598	0.138772	0.0247655	0.0603338	-0.000615841	0.120412
ILMN_2262198	NR_002217	PMS2 C-terminal like pseudogene (PMS2CL), non-coding RNA.	PMS2CL	0.00741073	-1.08868	0.146391		-0.112921	-0.184128	-0.288796	0.0425277	-0.0787642	-0.105931	-0.0476082	0.0354082	-0.175606	-0.122835	-0.0474679	-0.116329	0.116962	0.0897075	0.000662779	-0.0343038	0.0383548	0.0226468	-0.113729	0.00328007	0.159639	-0.128628	0.27258	-0.17665	0.15536	0.100904	0.104672	0.0610728	0.0491127	0.220456	0.139238
ILMN_2295518	NM_001039705	trophinin (TRO), transcript variant 6, mRNA.	TRO	0.00718617	-1.0887	0.14464		0.0124979	0.0297747	-0.120146	-0.136853	0.0120472	-0.176781	-0.00898127	0.188926	-0.0747169	-0.193993	-0.171217	-0.121554	-0.199634	-0.0387058	0.0853353	0.0363239	0.0627	-0.163166	-0.0810777	0.172553	-0.00561136	0.113104	0.195937	0.0533571	0.142112	-0.0579467	0.216312	-0.0328187	-0.12107	-0.0103935	0.265104
ILMN_3258356	XR_038408	PREDICTED: misc_RNA (LOC100128888), miscRNA.	LOC100128888	0.00639207	-1.08986	0.14097		0.0878081	-0.156893	-0.304876	0.172613	-0.144301	-0.0855316	-0.194724	-0.0747243	0.133488	-0.0631961	-0.0100883	-0.256957	-0.023811	0.0147739	0.0212692	-0.0206651	0.0958673	0.195941	0.0891221	-0.05086	0.0487049	0.190549	0.145592	0.0328875	0.207864	0.0129739	-0.0907689	0.0149742	0.00177653	0.162123	-0.0475823
ILMN_1730019	NM_014577	bromodomain containing 1 (BRD1), mRNA.	BRD1	0.00809132	-1.09028	0.14926		-0.109058	-0.122074	0.124369	0.0910564	-0.00738783	0.120704	-0.15583	0.172672	-0.0401717	-0.470377	-0.133688	-0.233397	0.0108348	-0.158561	-0.0143703	0.029284	-0.0310045	0.056442	0.171764	0.0246676	0.0186723	0.0629923	0.0873315	0.0329906	-0.0129226	0.0643218	0.11456	0.107638	0.106431	0.112546	0.0825379
ILMN_2216637	NM_018401	serine/threonine kinase 32B (STK32B), mRNA.	STK32B	0.00404955	-1.09147	0.13243		-0.2474	0.0522569	-0.260768	0.0123975	-0.0338178	-0.0966337	-0.0712387	-0.0720647	-0.107252	-0.188058	0.00140007	0.200056	-0.110527	-0.0092785	0.073669	0.0282873	0.0810747	0.146348	0.103124	0.0404468	0.0554984	0.182654	-0.0609183	0.254866	0.253307	-0.0691622	-0.00486975	0.0600195	-0.0659698	-0.0784458	0.0163953
ILMN_1705266	NM_021975	v-rel reticuloendotheliosis viral oncogene homolog A (avian) (RELA), mRNA.	RELA	0.00468513	-1.09231	0.135711		0.0819567	-0.107423	-0.0445016	-0.0977979	-0.0880939	0.0900188	0.0194392	-0.0176304	-0.162487	-0.0199603	-0.17763	-0.265199	-0.104433	-0.0714246	-0.0958714	-0.168641	0.321277	0.0884199	-0.0199943	0.0666801	0.12673	0.0422786	0.104334	0.233188	-0.141597	0.194241	0.0197985	0.0912111	0.0169412	-0.0076831	0.122233
ILMN_1727051	NM_018332	DEAD (Asp-Glu-Ala-As) box polypeptide 19A (DDX19A), mRNA.	DDX19A	0.00500211	-1.09414	0.135711		-0.155222	0.00086681	-0.0105867	0.109182	0.0192089	-0.275911	-0.123676	-0.124343	0.0372679	-0.0331222	-0.30101	-0.0440166	-0.0840699	0.00933027	-0.0975753	-0.0344988	0.0781382	0.142317	0.115683	0.0877937	-0.150566	0.283689	0.211839	0.222424	0.0538842	-4.0465e-05	0.0994325	0.109989	-0.0145528	0.01007	-0.0968464
ILMN_1792635	XM_942273	PREDICTED: similar to rhophilin-like protein (LOC654253), mRNA.	LOC654253	0.00505256	-1.09434	0.135711		-0.209485	0.0501178	0.129456	-0.212235	0.0255597	-0.101566	-0.274873	-0.118545	-0.156419	-0.0239546	0.0415734	0.00377237	-0.0645588	-0.0412615	-0.0804347	-0.0815397	0.385434	0.0771572	0.0817576	0.0631621	0.0531095	0.207722	0.115662	0.0592255	-0.100865	0.184051	-0.0526553	0.0496109	0.0458172	-0.0228492	0.0702493
ILMN_1665058	NM_032300	trichoplein, keratin filament binding (TCHP), mRNA.	TCHP	0.00122649	-1.09569	0.107361		0.058856	-0.120146	0.111106	-0.119301	-0.0986016	-0.0743773	-0.14403	-0.0587457	-0.195279	-0.295795	-0.139437	0.055959	-0.00573239	-0.0506936	0.0497097	-0.0611109	0.166783	0.053534	-0.106051	0.0530596	-0.0943714	0.129522	0.273306	0.0871415	0.0552965	-0.0272941	0.0587841	0.0502404	0.170154	0.0513736	0.0243262
ILMN_1773174	XM_935348	PREDICTED: similar to 3-phosphoinositide dependent protein kinase 1 (hPDK1), transcript variant 4 (LOC653650), mRNA.	LOC653650	0.00186705	-1.0957	0.116861		-0.0900799	0.0158691	-0.0831594	0.0505659	0.0150856	-0.0570211	-0.0104242	-0.0902948	-0.19937	-0.281996	-0.15413	0.00017865	-0.0990672	-0.0034127	0.0514353	0.171563	0.0773168	0.117309	-0.0405186	0.141834	0.177104	0.0274853	0.288728	-0.0682064	-0.0747664	0.00359586	0.175359	0.00422052	-0.150914	0.167494	-0.0262625
ILMN_1664718	NM_000786	cytochrome P450, family 51, subfamily A, polypeptide 1 (CYP51A1), mRNA.	CYP51A1	0.00362975	-1.09598	0.129876		0.0189088	-0.168317	-0.134307	-0.209649	-0.172446	-0.0238031	0.244245	-0.112941	-0.0597455	-0.0446883	-0.26023	0.020882	0.0090461	-0.0957074	-0.0436523	0.107297	-0.0551258	0.0542245	0.00758508	0.0599127	0.200789	0.132199	-0.118547	-0.018279	0.172238	0.27132	-0.0759456	0.0989364	0.132255	0.122445	-0.00059663
ILMN_1673746	NM_006327	translocase of inner mitochondrial membrane 23 homolog (yeast) (TIMM23), nuclear gene encoding mitochondrial protein, mRNA.	TIMM23	0.00627271	-1.09723	0.140468		-0.0338194	-0.130827	0.0667278	-0.22216	0.0244464	-0.109107	-0.341533	0.0485655	-0.16628	-0.0614091	0.0262719	-0.0537825	-0.0380163	0.0189692	-0.00281172	0.0303257	-0.00471055	0.0236677	-0.140692	0.0407148	0.196148	-0.0137109	0.216485	-0.0106169	0.083336	0.158696	0.100783	-0.0461681	0.423142	-0.0895175	0.130503
ILMN_2198516	NM_020801	arrestin domain containing 3 (ARRDC3), mRNA.	ARRDC3	0.00228954	-1.09781	0.118516		-0.00333615	-0.182017	-0.13896	-0.0844471	0.124234	-0.156379	-0.0045037	-0.171571	-0.114546	-0.088482	0.0294804	-0.289349	0.161915	-0.0889378	0.164321	0.0119613	-0.0172595	0.0289825	0.0204448	-0.0303398	0.114098	-0.0915352	0.0452309	0.127964	0.108336	0.214744	0.154046	0.170636	-0.0130288	-0.12867	0.186033
ILMN_1760628	NM_024718	chromosome 9 open reading frame 86 (C9orf86), mRNA.	C9orf86	0.00640396	-1.09886	0.141013		-0.0978811	0.156511	-0.0619117	-0.243973	-0.0923942	0.0309747	-0.134682	0.0618068	-0.139773	0.0128818	-0.166112	-0.351071	-0.21339	0.175681	-0.03942	0.0346967	0.162177	0.117241	0.0535983	-0.0179889	0.269305	-0.0254873	0.104996	0.00679754	0.204895	-0.0734632	-0.0646571	0.134169	-0.0488826	0.202242	0.000645509
ILMN_1732182	NM_001014765	F-box protein 44 (FBXO44), transcript variant 4, mRNA.	FBXO44	0.00277767	-1.09886	0.124734		-0.185279	-0.205031	0.0429527	-0.209001	0.0435305	0.0620419	-0.0833506	-0.144698	-0.0256015	-0.059521	-0.116099	-0.0293982	-0.262622	0.0701411	0.0635651	-0.075971	0.0236169	0.0498578	-0.127861	0.03949	0.110829	0.0752773	0.118212	0.0622974	0.149152	-0.106944	0.016985	0.131497	-0.0558275	0.380334	0.119533
ILMN_3244579	XM_001723218	PREDICTED: similar to heterogeneous nuclear ribonucleoprotein C-like 1 (LOC649330), mRNA.	LOC649330	0.00271067	-1.101	0.124227		0.130289	-0.0811253	-0.0910262	0.00932458	-0.05511	0.0157785	0.0577057	-0.099131	-0.226703	-0.0132183	-0.1374	-0.235459	-0.148968	-0.16113	0.0254885	0.113558	-0.015848	0.0600904	0.131878	-0.0505113	-0.0553963	0.134436	-0.14781	0.28931	0.0285682	0.360268	0.0332458	0.12397	0.0716655	-0.0658189	0.0646514
ILMN_1908488	CA439922	UI-H-DI0-auz-o-21-0-UI.s1 NCI_CGAP_DI0 cDNA clone UI-H-DI0-auz-o-21-0-UI 3, mRNA sequence	NaN	0.000625611	-1.10133	0.0896119		-0.293659	-0.11131	0.139377	-0.143573	-0.0762372	-0.196495	-0.12313	0.0362134	-0.145582	-0.0528829	-0.00593435	-0.0900306	-0.0585023	0.0241534	0.139492	-0.00810541	0.0290319	0.146488	0.0916129	0.0835592	-0.104983	0.0997202	0.0953813	-0.0822385	0.16127	-0.0647112	0.198897	-0.0125424	-0.024831	0.117476	0.168865
ILMN_1801923	NM_005171	activating transcription factor 1 (ATF1), mRNA.	ATF1	0.00183834	-1.10367	0.116861		0.0698802	-0.0213591	-0.0727617	-0.0616727	0.0950768	0.0696256	-0.130919	-0.266027	-0.0744346	-0.140492	0.053705	-0.205857	-0.0537116	-0.227192	0.186442	0.196623	-0.16689	-0.0595919	0.0612987	0.0137384	0.0489202	0.195492	-0.0563205	0.15744	0.041646	0.147968	0.168408	0.10334	-0.104353	0.175664	0.136306
ILMN_1719857	NM_020137	GRIP1 associated protein 1 (GRIPAP1), transcript variant 1, mRNA.	GRIPAP1	0.00703474	-1.10372	0.14434		-0.000456101	-0.0158188	0.00222679	0.0584274	-0.176175	-0.453277	-0.0555232	-0.0406252	-0.083061	-0.145668	-0.19857	-0.192325	0.022026	0.202874	0.0760055	-0.0993102	0.0925218	0.212956	-0.175847	0.0151117	-0.0918219	0.00411654	0.120604	0.248659	0.158781	-0.0149881	0.236396	0.0900605	0.0183701	0.132877	0.0892546
ILMN_2290998	NM_005125	copper chaperone for superoxide dismutase (CCS), mRNA.	CCS	0.00521582	-1.10386	0.137119		-0.0697014	0.106629	-0.0988334	0.0249439	0.0586321	-0.38849	-0.323628	0.161584	-0.180859	-0.181497	-0.254639	0.0165345	-0.167445	0.152629	0.0873538	0.0733176	0.151234	0.0183721	0.21276	-0.049508	0.113188	0.114914	0.081329	-0.06562	0.0819396	-0.0333908	0.120805	0.00749394	0.114979	-0.0264683	0.0315585
ILMN_1779163	NM_024684	chromosome 11 open reading frame 67 (C11orf67), mRNA.	C11orf67	0.00668174	-1.10427	0.141696		0.0439592	0.014045	-0.119139	-0.237559	0.0396291	-0.0102983	-0.137455	-0.000826783	0.0485933	-0.0717357	-0.150513	-0.254652	-0.152435	-0.131065	0.0767754	-0.0748681	0.143607	0.0402109	-0.0313214	0.0405231	0.40488	0.0668403	0.077304	0.196291	-0.161905	0.386128	-0.0712634	0.0112277	-0.128181	0.12514	-0.0280787
ILMN_1679867	XM_001127807	PREDICTED: similar to Diacylglycerol O-acyltransferase 1 (Diglyceride acyltransferase) (ACAT-related gene product 1) (LOC642255), mRNA.	LOC642255	0.00310789	-1.10524	0.124909		-0.0698165	-0.0486993	0.045278	0.0346813	-0.0394823	-0.154442	-0.419476	-0.0161787	-0.187809	-0.240372	-0.167742	-0.0185398	0.0639314	0.179681	0.100371	0.0118849	0.0539111	0.182003	-0.210788	0.0875716	0.120952	0.067064	0.0974478	0.0366244	0.16538	0.0620027	0.20753	0.0138726	0.174159	-0.0295141	0.0520579
ILMN_3247895	XM_001126103	PREDICTED: similar to phosphoglycerate mutase processed protein (LOC728188), mRNA.	LOC728188	0.00160949	-1.10611	0.115688		0.0636197	-0.0513607	-0.0890051	0.00575216	0.00307734	-0.141464	-0.141632	-0.167881	0.122791	-0.209187	-0.353652	-0.11155	0.0942172	-0.0726037	0.10065	-0.0332538	-0.00258923	0.00575216	0.289763	0.123032	-0.00233535	-0.0928074	0.120196	0.0487544	0.0525262	-0.0898327	0.204862	0.192372	0.138517	0.0274628	0.116715
ILMN_2370692	NM_018089	ankyrin repeat and zinc finger domain containing 1 (ANKZF1), transcript variant 1, mRNA.	ANKZF1	0.00172768	-1.10617	0.116861		-0.0829506	-0.107336	0.044381	-0.247835	0.0588187	0.0226985	-0.0707519	-0.0223354	-0.0819863	-0.0300912	-0.0774033	-0.150319	-0.1998	-0.0755225	0.127198	-0.0228722	-0.0613858	0.132541	-0.0645405	-0.0779312	0.0513606	0.204473	-0.0129107	0.264057	0.293925	-0.190201	0.224733	0.0718253	0.114983	-0.000924142	0.18121
ILMN_1755179	NM_178532	ring finger protein 180 (RNF180), mRNA.	RNF180	0.00179778	-1.10653	0.116861		0.217749	-0.118874	-0.0873654	0.0387244	0.00984786	-0.0576914	-0.263291	-0.140233	-0.221927	-0.0943213	-0.194042	-0.147133	-0.0978542	0.0406281	0.0572273	0.28341	0.0632835	-0.00913316	-0.145331	-0.114436	0.100005	0.231693	0.0891129	0.123356	0.148256	0.100148	-0.0364966	0.0956806	0.125317	-0.0508109	0.0665647
ILMN_3263601	XR_037114	PREDICTED: misc_RNA (LOC100129093), miscRNA.	LOC100129093	0.00416317	-1.10715	0.13306		-0.0170584	-0.291521	-0.0682928	-0.000739003	-0.0907452	-0.0374229	0.0104034	-0.0069655	0.108994	-0.291782	0.0069769	-0.0216229	-0.176196	-0.232366	0.0243358	0.0119242	0.0911221	0.244174	0.0504677	0.11069	0.0625678	0.248802	0.0248819	-0.060746	-0.0988547	0.305239	0.00100675	-0.150952	-0.0212705	-0.00844152	0.315606
ILMN_3277715	XR_038551	PREDICTED: misc_RNA (LOC389873), miscRNA.	LOC389873	0.00210486	-1.10719	0.118502		-0.172989	-0.0586493	-0.000913383	-0.143367	-0.207863	-0.0584719	-0.0657857	0.080501	0.0529417	-0.235681	-0.163686	-0.22296	-0.0307024	0.0522074	-0.0459603	0.0850569	-0.05762	0.0435453	-0.152791	-0.131152	0.103314	-0.0373812	0.249998	-0.0227419	0.104361	-0.021858	0.105193	0.217401	0.233814	0.152246	0.24455
ILMN_2406132	NM_006864	leukocyte immunoglobulin-like receptor, subfamily B (with TM and ITIM domains), member 3 (LILRB3), transcript variant 2, mRNA.	LILRB3	0.00456688	-1.10792	0.135711		0.148459	0.072984	-0.108568	-0.0781309	0.0452258	-0.273964	-0.05153	-0.175287	-0.0179809	-0.0179809	-0.273964	-0.108568	-0.0960091	-0.123597	0.207827	0.123874	0.314176	0.192086	0.168583	-0.0960091	0.0177253	0.168583	-0.030625	0.307036	0.0919308	-0.123597	-0.0960091	0.0177253	0.000238166	-0.132908	0.0970515
ILMN_1750792	XM_001125720	PREDICTED: Vac14 homolog (S. cerevisiae) (VAC14), mRNA.	VAC14	0.00272452	-1.10819	0.124227		-0.140675	-0.0121516	-0.11162	0.00331583	-0.0921705	-0.0621966	-0.130989	-0.0772359	-0.261898	-0.126666	-0.138885	-0.180436	0.0193499	0.160382	0.099653	0.0300291	-0.0435281	0.0956521	0.057873	-0.0808489	0.0151422	0.0142788	0.111319	0.226891	0.390574	-0.224285	0.171223	0.193796	-0.00971721	0.148233	-0.07559
ILMN_1805342	XM_942185	PREDICTED: similar to fem-1 homolog a (LOC652634), mRNA.	LOC652634	0.00135958	-1.10845	0.108553		0.0288469	0.102629	-0.0991384	-0.0395117	0.0438766	-0.148559	0.0604497	-0.00243218	-0.209815	-0.249407	-0.285933	-0.109995	-0.0603674	-0.153458	-0.0258013	0.105619	0.0174576	0.0468322	-0.229775	0.01477	0.104682	0.0953621	0.0969365	0.071848	0.1314	0.214306	-0.0176845	-0.0381465	0.217701	0.229413	0.126948
ILMN_3262454	XM_001722552	PREDICTED: similar to hCG2013701 (LOC100128056), mRNA.	LOC100128056	0.0051294	-1.11001	0.136472		-0.014775	-0.0190453	-0.247708	-0.0439454	-0.000150176	-0.0416936	-0.303041	-0.209358	-0.0225879	-0.177042	-0.0692182	-0.0887746	-0.0509867	0.198123	-0.0704796	0.00429108	-0.0234148	0.150048	0.0490335	-0.0251808	0.0737593	0.126624	0.00991749	0.481589	0.0280729	0.335632	0.129014	-0.0292937	0.119612	-0.0716129	-0.0517859
ILMN_1796669	NM_000021	presenilin 1 (Alzheimer disease 3) (PSEN1), mRNA.	PSEN1	0.00750579	-1.11096	0.146406		0.00897703	-0.0862545	-0.0702177	-0.10773	-0.0370375	-0.130759	-0.335566	-0.0910597	-0.121576	-0.239791	-0.0163821	0.0892866	0.039034	-0.00477278	-0.0728224	0.0670838	0.0862916	0.303617	-0.136445	0.114416	0.0342086	-0.188017	0.104656	0.0249284	0.0372195	0.473462	0.2043	-0.0840092	0.271537	-0.0887728	0.088598
ILMN_1659537	NM_201542	mediator of RNA polymerase II transcription, subunit 8 homolog (S. cerevisiae) (MED8), transcript variant 1, mRNA.	MED8	0.00217469	-1.11101	0.118516		0.0503048	-0.00882656	0.0948287	-0.143072	-0.0678879	-0.111707	-0.225004	0.165177	-0.0581623	-0.288988	-0.20809	-0.308923	-0.0696343	-0.0213762	0.160843	0.221093	0.149668	0.0590222	-0.0729008	-0.00319206	0.0667022	-0.0535242	0.223665	0.0900214	0.153755	-0.169544	0.135649	0.157131	-0.0624802	0.0371038	0.0300416
ILMN_1754199	NM_001707	B-cell CLL/lymphoma 7B (BCL7B), mRNA.	BCL7B	0.0050408	-1.11153	0.135711		-0.0417589	-0.12331	-0.0485073	0.000298131	-0.0438805	-0.143905	-0.244905	0.124804	-0.0778619	-0.074564	-0.343861	-0.411961	-0.0806568	0.204772	0.093982	0.055402	0.0962409	0.00355547	-0.00842569	0.0653603	0.189286	0.0886392	0.299684	-0.053082	0.130365	-0.238059	0.0988987	0.0646272	-0.0606341	0.0249341	0.15761
ILMN_1748884	NM_016272	transducer of ERBB2, 2 (TOB2), mRNA.	TOB2	0.00708625	-1.1117	0.14434		0.0836891	0.0776093	-0.249572	0.066136	-0.0187102	0.13868	0.0424024	-0.138539	-0.049353	-0.37934	-0.344563	-0.211321	-0.168525	-0.0560174	0.0648631	0.00970832	0.265788	0.205852	-0.144638	-0.0521329	-0.0700067	-0.06066	-0.0598307	0.140113	0.0498588	0.337372	0.0734525	0.036799	0.119769	0.149384	0.0652863
ILMN_1777726	NM_032236	ubiquitin specific peptidase 48 (USP48), transcript variant 1, mRNA.	USP48	0.00750011	-1.11186	0.146406		-0.0353292	-0.00721937	0.014152	-0.297397	0.0603723	-0.240273	-0.0356823	-0.0427731	-0.275475	-0.148545	-0.158301	-0.167231	-0.0575021	0.229297	0.00313626	-0.000881654	-0.0464827	0.229448	-0.264421	-0.0848849	-0.0235895	-0.0903409	0.197207	0.0832318	0.254794	0.288113	0.132517	0.174061	0.0341518	0.250157	0.0533803
ILMN_1759872	XM_928156	PREDICTED: similar to Dihydrofolate reductase, transcript variant 1 (LOC643509), mRNA.	LOC643509	0.00494892	-1.11188	0.135711		-0.00411441	-0.0861539	0.139536	-0.00411441	0.00126604	-0.331522	-0.168756	-0.203799	0.106326	-0.0498246	-0.277761	-0.15529	-0.146311	-0.00816646	-0.0157374	-0.0449936	0.153096	0.219687	-0.161968	0.0182226	-0.0157374	0.0848319	0.233555	0.0451268	0.313582	-0.165595	0.250363	-0.0715132	0.153096	0.0310249	0.130621
ILMN_1679577	NM_032233	SET domain containing 3 (SETD3), transcript variant 1, mRNA.	SETD3	0.00259258	-1.11349	0.124049		-0.305085	-0.170484	-0.104611	0.00434872	-0.0171026	-0.0146887	-0.0840909	-0.0852236	-0.193013	-0.109429	-0.0446197	-0.176923	-0.109599	0.222638	-0.00249958	-0.0599476	-0.0504961	0.213563	0.158502	0.0316322	0.0824706	0.230512	0.0383513	0.242844	-0.0341875	0.124149	0.241596	-0.013746	-0.276244	0.136412	0.131206
ILMN_1730930	NM_014741	KIAA0652 (KIAA0652), mRNA.	KIAA0652	0.00311625	-1.1138	0.124909		-0.0173748	-0.0375466	-0.122915	-0.0153066	-0.2823	-0.0714022	-0.226939	0.101667	-0.113362	0.000618722	-0.115024	-0.146689	-0.321024	0.134213	-0.0156468	0.0142661	0.146051	0.226216	-0.168658	-0.0405436	0.181957	0.0211773	0.183772	0.0533841	0.241843	-0.112458	0.140866	0.306274	0.0315823	0.0391162	-0.103489
ILMN_2323491	NM_153719	nucleoporin 62kDa (NUP62), transcript variant 1, mRNA.	NUP62	0.000314212	-1.11408	0.072806		-0.113631	-0.19815	0.0300629	-0.182741	-0.0837005	-0.0184636	0.0390645	0.176557	-0.0715145	-0.129945	-0.317757	-0.219334	-0.078965	-0.0705997	-0.000237151	0.0696083	0.0533584	0.0966318	0.0626533	0.203503	0.131492	-0.0769939	0.210102	0.137857	0.083699	-0.0145672	0.120303	-0.113631	0.0511253	0.00560959	0.124334
ILMN_1690325	NM_002505	nuclear transcription factor Y, alpha (NFYA), transcript variant 1, mRNA.	NFYA	0.00773796	-1.11417	0.147524		0.0309019	-0.190641	-0.00356055	0.0229324	0.113234	-0.091337	-0.379338	0.152892	-0.128978	-0.222346	-0.199702	-0.397771	0.13041	-0.0209911	0.0261952	0.162958	-0.0545188	0.172342	-0.0627317	-0.118068	0.0340815	0.05418	0.117119	0.301816	0.182821	-0.0420134	0.0799626	-0.148405	0.118546	0.187415	0.20166
ILMN_3237645	NM_145309	leucine rich transmembrane and 0-methyltransferase domain containing (LRTOMT), mRNA.	LRTOMT	0.00429048	-1.11473	0.134718		-0.0779239	-0.0200231	-0.23829	0.0521144	0.0959725	0.101888	-0.393948	0.0505753	-0.069505	-0.186555	-0.268197	-0.121493	-0.166948	0.104046	0.0811543	0.0502165	0.0353824	0.16165	0.0898932	-0.0889872	0.0983157	0.386905	0.0978945	0.16281	0.0378645	0.0535518	0.198855	-0.0968533	-0.173044	0.0639381	0.122055
ILMN_1655482	NM_006510	tripartite motif-containing 27 (TRIM27), mRNA.	TRIM27	0.00185352	-1.11482	0.116861		-0.0614398	0.11729	-0.15858	-0.184517	-0.175009	-0.0796503	-0.289437	-0.0340701	0.0173995	0.0547081	-0.162036	-0.244257	0.118738	0.0197237	-0.0479406	0.0273065	0.143115	0.179656	-0.109833	-0.134235	0.0940184	0.271188	0.259289	0.242107	0.0914634	0.131113	0.110619	-0.0123113	-0.0656306	0.0835239	0.113889
ILMN_1696420	NM_013263	bromodomain containing 7 (BRD7), mRNA.	BRD7	0.00288428	-1.1152	0.124909		-0.179439	-0.00360893	-0.0476204	-0.116782	0.00990114	0.0758241	-0.106938	-0.00757663	-0.0760217	-0.34882	-0.314949	-0.213891	0.00830941	0.0722933	-0.0808504	-0.0547611	0.0193168	0.152082	0.253518	0.030091	0.0585629	-0.114101	0.0766954	0.166054	0.17993	0.0893207	-0.0847387	-0.033024	-0.0680554	0.333529	0.233607
ILMN_3230286	XM_001732887	PREDICTED: hypothetical LOC731605 (LOC731605), mRNA.	LOC731605	0.00231031	-1.11525	0.118516		-0.117642	0.0795041	-0.146824	-0.145202	0.109237	0.00329201	-0.256392	-0.0740819	-0.074623	-0.119052	-0.0526477	-0.147183	-0.272886	-0.00466393	0.0359669	0.115078	-0.213397	0.157024	-0.114178	0.053546	0.0550256	0.0333791	0.10529	0.154436	0.265121	-0.00356806	0.199119	-0.228516	0.168982	0.252902	0.158663
ILMN_1771019	NM_004687	myotubularin related protein 4 (MTMR4), mRNA.	MTMR4	0.00590505	-1.11549	0.13879		0.00952262	-0.0108913	-0.0715821	-0.0515986	0.195033	0.0339052	-0.299671	-0.122306	-0.32152	-0.0190371	-0.14536	-0.235766	-0.0549895	-0.0893587	0.171917	-0.064137	0.0464211	0.109876	-0.182829	0.0219982	-0.118935	0.109876	0.172109	0.0486162	0.350653	-0.123445	0.250198	-0.0852987	0.32026	0.0916039	0.124332
ILMN_2407589	NM_004715	CTD (carboxy-terminal domain, RNA polymerase II, polypeptide A) phosphatase, subunit 1 (CTDP1), transcript variant FCP1a, mRNA.	CTDP1	0.00431213	-1.11707	0.134766		0.10982	0.0804389	-0.128158	0.0643972	-0.111321	-0.179234	-0.0718907	-0.0842241	-0.174778	-0.256501	-0.200785	0.035164	-0.225785	-0.0323645	-0.218809	-0.167175	0.154502	0.237287	0.0331616	0.0741753	-0.00652141	0.356177	0.17703	0.131617	-0.0544943	-0.0360807	0.167376	-0.104961	0.184715	0.0746644	0.285414
ILMN_2385097	NM_022477	NDRG family member 3 (NDRG3), transcript variant 2, mRNA.	NDRG3	0.00477952	-1.11722	0.135711		-0.129376	-0.0799597	-0.149015	0.0596642	0.139813	-0.0630636	-0.0510491	-0.0279936	-0.0990136	-0.336501	-0.347837	-0.231333	0.0025859	0.0555026	0.0221002	-0.0860899	-0.122566	0.0785468	0.0759478	0.176296	-0.00599396	-0.220563	-0.0105097	0.257641	0.12981	0.0378908	0.263738	-0.00268441	0.165952	0.357219	0.0748015
ILMN_1777299	XM_942413	PREDICTED: similar to general transcription factor II, i isoform 1 (LOC652771), mRNA.	LOC652771	0.00121065	-1.1182	0.106633		0.102226	0.0167145	-0.0965534	0.105262	-0.0416159	-0.216866	-0.0358881	-0.194683	-0.190578	-0.00521994	-0.146679	-0.349163	-0.117754	0.0133043	0.0728027	0.0484329	0.0298815	0.0872648	0.0576926	0.0196069	0.0162758	-0.0180042	0.100172	-0.0522088	0.185813	-0.046784	0.307917	0.104349	0.399707	0.0369929	-0.0153897
ILMN_1726327	NM_001008218	amylase, alpha 1B (salivary) (AMY1B), mRNA.	AMY1B	0.00191726	-1.11892	0.116861		-0.127593	-0.0454371	-0.20724	-0.305749	0.123833	0.0789153	-0.178512	-0.0653724	0.129174	-0.303075	-0.083371	-0.0761214	-0.170844	-0.141776	-0.0461956	0.214242	-0.120448	0.211224	0.0794693	-0.0157833	-0.00768755	0.0273735	0.126202	-0.160828	0.198185	0.2512	0.115921	-0.0757968	0.202746	0.0235259	0.065102
ILMN_1806631	XM_927177	PREDICTED: similar to CG33932-PA, isoform A (LOC653383), mRNA.	LOC653383	0.0033878	-1.11896	0.12743		0.0111913	-0.164519	-0.0838743	-0.116107	0.11584	-0.110169	-0.385765	0.0115065	-0.26013	-0.228382	0.0462493	-0.293988	0.142382	0.0513298	0.0877989	-0.145213	-0.114865	0.100039	0.00685428	0.105509	0.166895	-0.0955155	0.187909	0.0264878	0.24159	0.039442	0.282231	-0.0310439	0.158105	0.0893003	0.115828
ILMN_1781454	NM_003610	RAE1 RNA export 1 homolog (S. pombe) (RAE1), transcript variant 1, mRNA.	RAE1	0.000455879	-1.11946	0.0832933		-0.0667959	-0.18824	-0.00249949	-0.278007	-0.0523793	0.00348233	-0.00801	0.0438377	-0.127169	-0.413394	-0.115711	-0.127169	-0.123995	0.149883	-0.0538956	-0.0642475	0.194209	0.026727	-0.0378528	0.0608168	0.0169936	0.104633	0.180363	0.162301	0.15101	-0.0170394	-0.0148171	0.0711913	0.0951031	0.168599	0.137539
ILMN_1713129	NM_007344	transcription termination factor, RNA polymerase I (TTF1), mRNA.	TTF1	0.00340726	-1.12006	0.127602		-0.181833	0.134102	-0.189154	-0.0206584	0.0772976	0.0203102	0.0663315	-0.0220757	-0.157517	-0.195261	-0.176923	-0.384266	-0.171664	0.00658445	-0.0110993	0.0810387	-0.0971476	0.0185138	0.0764582	0.162814	0.0771393	-0.29322	0.211952	0.0461373	0.368344	-0.00238258	0.110568	0.120998	0.132107	0.171298	0.156627
ILMN_3289650	XR_038697	PREDICTED: misc_RNA (LOC402112), miscRNA.	LOC402112	0.00537169	-1.12059	0.13802		-0.114201	-0.0328709	-0.14178	-0.182748	-0.100399	0.031776	-0.0143139	-0.019131	-0.0830979	-0.0233629	-0.182684	-0.187031	-0.303837	-0.0138598	-0.0755118	-0.0945649	-0.227328	0.28466	0.106927	0.148246	0.0190427	-0.14871	0.324587	-0.0180858	0.0830495	-0.0945801	0.474723	0.0705869	-0.0566183	0.0967251	0.238606
ILMN_1696127	NM_015349	KIAA0240 (KIAA0240), mRNA.	KIAA0240	0.0013628	-1.12084	0.108553		-0.12391	-0.00545175	0.100509	-0.0772517	0.0606068	-0.0721306	-0.130414	-0.252761	-0.117093	-0.231982	-0.137091	-0.219933	-0.0452532	0.092456	0.241763	0.202202	0.0284158	0.166369	0.00261196	-0.0890456	0.0284158	-0.0417404	0.273675	0.250197	-0.00507336	-0.162821	0.26268	0.0563806	-0.0532225	0.0140485	0.214768
ILMN_2106227	NM_001017969	KIAA2026 (KIAA2026), mRNA.	KIAA2026	0.00793292	-1.12088	0.148824		0.119147	-0.0870341	-0.129552	-0.0193933	0.0270699	-0.0574489	-0.428283	0.0495346	-0.299304	-0.358482	-0.0200551	-0.249041	-0.0537393	0.2086	-0.0520401	0.203709	-0.0633075	0.092282	-0.00503113	-0.200029	-0.0643437	0.0156647	0.19752	0.239764	0.204396	0.131812	0.303913	0.162458	0.11683	-0.0725264	0.0116319
ILMN_3202448	XM_001725738	PREDICTED: similar to hCG1782458 (LOC100132413), mRNA.	LOC100132413	0.00320586	-1.12251	0.125163		-0.19417	-0.0150347	-0.0733603	0.180846	0.200075	-0.161175	-0.141611	-0.142319	-0.336487	-0.146754	-0.00700272	-0.266655	-0.168068	-0.0105198	0.232594	-0.0190515	0.390295	0.0215247	-0.0819108	0.0214884	-0.0781599	-0.0795667	0.0887125	-0.0699963	0.01364	0.0849499	0.0510498	0.247891	0.0552868	0.235231	0.163511
ILMN_2183885	NM_138701	chromosome 7 open reading frame 11 (C7orf11), mRNA.	C7orf11	0.00530962	-1.12333	0.13802		0.177453	-0.112719	-0.157145	-0.195357	0.187303	0.0173789	-0.215896	-0.12087	-0.0157984	-0.222929	0.040018	-0.250909	-0.0304555	-0.338617	0.23128	0.11066	-0.254767	-0.0520021	-0.113859	0.176317	0.26768	0.234939	0.0474117	-0.106151	0.166411	0.112134	0.173514	-0.0503741	0.00338676	0.22614	0.175554
ILMN_1787081	NM_001488	transcriptional adaptor 2A (TADA2A), transcript variant 1, mRNA.	TADA2A	0.00215737	-1.12347	0.118516		0.0984804	-0.063531	0.0736493	-0.0397608	-0.0963642	-0.15084	-0.0270333	-0.182921	-0.24339	-0.239438	0.00040655	-0.31235	-0.0543473	-0.0849074	0.0393977	0.204064	-0.00691408	-0.0229491	0.0613038	-0.132125	0.216167	0.476294	0.0817107	-0.0106795	0.172002	-0.064594	0.0413649	-0.0114789	-0.137467	0.189689	0.15389
ILMN_3291673	XM_001723489	PREDICTED: hypothetical protein LOC100131452 (LOC100131452), mRNA.	LOC100131452	0.00228469	-1.12375	0.118516		0.114583	-0.122555	-0.0671111	-0.145631	0.00556841	-0.185496	0.00855211	-0.0465228	-0.230155	0.167989	-0.252032	-0.193869	-0.103921	-0.129426	0.164193	-0.00955434	-0.0334715	0.104049	-0.0917471	0.00407424	0.172257	0.12447	-0.0989968	0.0444821	0.139427	-0.0430933	-0.154286	0.348454	0.232108	0.362299	0.163976
ILMN_1807600	NM_017921	nuclear protein localization 4 homolog (S. cerevisiae) (NPLOC4), mRNA.	NPLOC4	0.00613438	-1.12376	0.140468		-0.198816	-0.124191	-0.0138057	-0.0183252	-0.267132	-0.232161	-0.0218875	-0.00619519	0.00595447	-0.00928458	-0.410391	-0.0764666	-0.257405	0.422418	-0.205027	-0.0764666	0.135015	0.00462341	0.124496	0.0395308	0.133944	0.0670354	0.23363	0.146054	0.173652	0.0736265	0.0720066	0.23363	0.176623	0.154257	-0.0915391
ILMN_3273493	XR_039545	PREDICTED: misc_RNA (LOC100130092), miscRNA.	LOC100130092	0.00744796	-1.12412	0.146391		0.285703	-0.25911	-0.184625	-0.146246	0.0834564	0.155124	-0.164765	-0.176453	-0.112856	-0.259893	-0.25181	-0.16315	-0.040849	-0.0869805	0.0393435	-0.239942	-0.0291268	0.194201	0.0623126	0.0780566	0.0622508	-0.178152	-0.0224137	0.0970179	0.0325033	0.332154	0.327825	0.0392807	0.093689	0.0150538	0.359668
ILMN_1666933	NM_004674	ash2 (absent, small, or homeotic)-like (Drosophila) (ASH2L), mRNA.	ASH2L	0.00114972	-1.12421	0.102555		0.0129503	0.00703986	-0.216177	-0.0172683	0.0884274	-0.210827	-0.0169636	-0.0427319	-0.0580847	-0.295652	-0.379669	-0.183243	-0.14055	0.0801738	-0.0351707	0.121645	0.131615	0.165381	0.165784	-0.0472364	-0.0765882	0.000662539	0.0237237	0.373958	0.0888355	0.151183	-0.0485273	0.201073	0.0217883	0.00191019	-0.0351707
ILMN_1719611	NM_001762	chaperonin containing TCP1, subunit 6A (zeta 1) (CCT6A), transcript variant 1, mRNA.	CCT6A	0.00550239	-1.12504	0.13879		-0.0579971	-0.00320797	-0.0440302	-0.0581582	0.0548554	-0.192859	-0.13794	0.0429102	-0.0966364	-0.357389	-0.143567	-0.473993	-0.0236319	0.0645123	0.0581648	0.111212	-0.15332	-0.0215037	-0.159966	0.0481049	0.115356	-0.277108	0.19369	0.165265	0.173777	-0.0255307	0.218566	-0.00606466	0.26702	0.291173	0.15782
ILMN_2212690	NM_014153	zinc finger CCCH-type containing 7A (ZC3H7A), mRNA.	ZC3H7A	0.000991936	-1.12518	0.100197		-0.161872	-0.233091	-0.135654	-0.141831	-0.0266016	-0.0813939	-0.187888	0.288533	-0.117826	-0.236837	0.0266017	-0.208873	-0.0418683	-0.0408376	0.0199157	0.138995	-0.140519	0.130337	-0.0263368	0.21004	0.0108347	0.253983	-0.0019784	0.0477714	0.096507	-0.131829	0.0660797	0.133216	0.0988741	0.0822449	0.326635
ILMN_1672278	NM_022059	chemokine (C-X-C motif) ligand 16 (CXCL16), mRNA.	CXCL16	0.00312007	-1.12526	0.124909		-0.115751	-0.101355	-0.00855774	-0.020684	-0.0843377	-0.497763	-0.238398	-0.125063	0.139707	-0.0565679	-0.0287065	-0.259761	0.0640669	0.0656272	-0.0496777	0.0224228	0.0426947	0.026388	0.233275	-0.193877	-0.0628112	0.195962	0.145168	0.158558	0.0577274	0.264242	0.145974	0.0108876	0.209858	0.243164	-0.0946609
ILMN_1672650	NM_002654	pyruvate kinase, muscle (PKM2), transcript variant 1, mRNA.	PKM2	0.00567202	-1.12528	0.13879		-0.195939	-0.0298849	-0.21426	-0.240456	-0.028397	-0.234791	0.017881	0.0669187	0.0957022	-0.2497	-0.540573	-0.0896212	0.0683379	0.238563	-0.0150962	0.105156	0.121183	0.131437	0.0350273	0.050803	0.225005	0.148789	0.0515288	0.147289	0.163964	-0.133957	0.0455784	0.32867	-0.0948321	-0.0094331	-0.0287721
ILMN_2330584	NM_001014449	DEAD (Asp-Glu-Ala-As) box polypeptide 19B (DDX19B), transcript variant 3, mRNA.	DDX19B	0.00522835	-1.12581	0.137119		-0.043166	0.0797255	0.068484	-0.048063	-0.0608583	-0.149099	-0.0861062	-0.189575	-0.0688363	-0.36358	-0.321877	0.0235759	-0.246278	-0.0196632	0.0777229	0.0124563	0.0451245	0.175046	0.26095	-0.0529767	0.190119	0.0102257	0.268565	0.344652	0.141949	-0.346603	-0.0127078	-0.0172883	-0.175067	0.206408	0.046977
ILMN_2411915	NM_178326	ATG4 autophagy related 4 homolog B (S. cerevisiae) (ATG4B), transcript variant 2, mRNA.	ATG4B	0.00416615	-1.12614	0.13306		0.2213	-0.0993708	-0.274358	-0.170237	0.120006	-0.166364	-0.164899	-0.0551566	0.115318	-0.243968	-0.301958	-0.32443	-0.0793051	0.111606	0.209133	0.162025	0.0533107	0.370992	-0.0705838	-0.0670311	0.157506	0.133229	0.13415	0.0115983	0.198269	-0.0947472	0.149922	-0.127263	-0.0163027	0.0167306	0.0998035
ILMN_1797499	NM_001081640	protein kinase, DNA-activated, catalytic polypeptide (PRKDC), transcript variant 2, mRNA.	PRKDC	0.0010617	-1.12623	0.100197		0.0136059	-0.126611	-0.297687	-0.089722	-0.00438697	-0.0255265	0.0587626	0.0363634	-0.0416843	-0.415946	-0.0202716	-0.271703	-0.243525	0.0668403	0.174944	-0.0183283	0.142146	0.304967	-0.0195728	0.0389485	-0.0263549	0.0952319	0.0670382	0.091185	0.167026	-0.11621	0.170677	0.0836488	0.128561	-0.127454	0.105769
ILMN_1668861	XM_001134259	PREDICTED: similar to Triosephosphate isomerase (TIM) (Triose-phosphate isomerase), transcript variant 2 (LOC732165), mRNA.	LOC732165	0.00688279	-1.12644	0.142262		0.0683048	-0.0854019	0.0157192	-0.15874	0.0192329	-0.169763	-0.373344	0.0624205	-0.324628	0.0706534	-0.195544	-0.0412018	-0.175496	0.0199497	-0.0794498	-0.0868633	-0.0136418	0.0610608	-0.283904	0.0423547	0.201791	0.129656	-0.0632213	0.019627	0.196717	0.0767581	0.335582	0.0264726	0.0950579	0.464909	0.257692
ILMN_2117171	NM_006769	LIM domain only 4 (LMO4), mRNA.	LMO4	0.0068918	-1.12672	0.142262		0.236468	-0.189823	0.0137466	-0.0668123	-0.0621904	0.24234	-0.337135	-0.0647119	-0.00779065	-0.110192	-0.104066	-0.235603	-0.544542	-0.0715396	0.267667	0.148881	0.051111	0.103044	-0.00597222	0.0547307	-0.00376102	-0.115384	-0.141383	0.0171693	0.250062	0.283938	0.116087	0.0219062	-0.0152367	0.154047	0.158565
ILMN_1723909	NM_001011538	similar to 60S ribosomal protein L21 (LOC402176), mRNA.	LOC402176	0.00629651	-1.12721	0.140468		0.189477	-0.110066	-0.179945	-0.232205	0.0420709	-0.0414642	-0.211132	-0.0124264	-0.230815	-0.221096	-0.21715	-0.276566	0.2694	-0.0268549	0.170252	0.0188731	0.0288103	0.174729	-0.0333457	-0.0772112	0.13052	-0.0865325	0.23452	-0.0103201	0.289957	-0.313378	0.100807	0.196581	0.315143	0.125956	0.143093
ILMN_3223181	NM_001136232	SEC13 homolog (S. cerevisiae) (SEC13), transcript variant 2, mRNA.	SEC13	0.00653179	-1.12725	0.141197		-0.278802	0.0433093	-0.040479	0.0985967	-0.0412415	-0.143376	0.00895207	-0.105486	-0.0224651	-0.386865	-0.491462	-0.0528857	-0.129386	0.170045	-0.271111	-0.0738585	0.217687	-0.0910492	0.0593851	0.135642	0.124216	0.268411	0.209895	0.231301	0.241624	-0.107807	0.0148281	0.107811	0.0677209	0.0972522	0.0403799
ILMN_1651499	NM_020462	endoplasmic reticulum-golgi intermediate compartment (ERGIC) 1 (ERGIC1), transcript variant 2, mRNA.	ERGIC1	0.00788379	-1.1274	0.148567		0.343893	-0.0374149	-0.0854197	-0.0494807	0.106982	-0.0555242	-0.338848	-0.129295	-0.0192884	-0.116757	-0.29573	-0.138028	-0.255168	-0.232595	0.0986575	0.148925	0.245688	0.35653	-0.174776	-0.0851668	0.163256	0.051099	0.253656	-0.0620539	0.167259	-0.217712	-0.0640463	0.105826	0.200857	-0.0415665	0.212848
ILMN_1724994	NM_001846	collagen, type IV, alpha 2 (COL4A2), mRNA.	COL4A2	0.0042857	-1.12753	0.134718		-0.120941	0.12115	-0.160198	-0.253027	0.0744032	0.0428762	-0.357159	0.0530666	-0.233527	-0.00270984	-0.144836	-0.111188	-0.0969045	-0.195003	0.334537	0.0400236	0.288528	-0.00385287	0.0124316	0.0432324	0.287931	-0.170004	0.210545	-0.105237	-0.00326992	-0.121187	0.231739	0.296801	0.0244047	-0.103022	-0.000307906
ILMN_2362368	NM_001025203	U2 small nuclear RNA auxiliary factor 1 (U2AF1), transcript variant b, mRNA.	U2AF1	0.00444027	-1.12813	0.135711		0.366801	-0.0343154	0.00445011	-0.208487	0.00270748	-0.0623299	-0.240764	-0.0612068	-0.154212	-0.258817	-0.24268	-0.291121	0.0404559	-0.110262	0.119943	0.0641252	0.1976	-0.110372	-0.130805	-0.171543	-0.125574	0.0640782	0.110216	0.0993005	0.156379	0.0838925	0.104938	0.251125	0.301709	0.252626	0.171671
ILMN_2334121	NM_006904	protein kinase, DNA-activated, catalytic polypeptide (PRKDC), transcript variant 1, mRNA.	PRKDC	0.00233346	-1.12838	0.118516		-0.0582306	-0.252275	-0.0897784	0.00864881	0.155824	0.105813	-0.0185783	-0.207677	-0.161985	-0.154931	-0.170344	-0.129401	-0.360278	0.0964891	0.063558	0.193786	-0.0989623	0.0212356	-0.243264	0.11271	0.189108	0.213635	0.0289169	0.18557	0.0750035	0.00017851	0.118206	0.0252757	-0.0365476	0.265466	0.346691
ILMN_3214052	XR_038951	PREDICTED: misc_RNA (LOC644877), miscRNA.	LOC644877	0.00563877	-1.12846	0.13879		0.13011	0.0667269	-0.263196	-0.0842301	0.0700006	0.112175	-0.139963	-0.137727	-0.0770288	-0.104165	-0.0236767	-0.619451	-0.00214657	-0.238281	0.211963	0.122047	-0.157603	-0.0644248	0.0207289	0.0883848	0.1241	-0.204169	0.0177339	0.123212	0.0309701	0.0730256	0.206387	0.142262	0.163894	0.260498	0.213236
ILMN_3250899	NM_177552	sulfotransferase family, cytosolic, 1A, phenol-preferring, member 3 (SULT1A3), transcript variant 2, mRNA.	SULT1A3	0.00134596	-1.12888	0.108553		-0.267547	-0.146741	-0.0608373	-0.143786	-0.0446061	0.0463236	-0.0580274	0.0343173	-0.0131229	-0.197013	-0.194262	-0.118901	-0.259996	0.176325	0.0446565	-0.133302	0.309175	0.146004	-0.0582201	0.119991	0.304309	-0.00874855	0.145867	0.363554	0.116344	0.0047483	-0.0217663	0.0759831	-0.142839	0.0608707	0.131238
ILMN_1691062	XM_936255	PREDICTED: hypothetical protein LOC642198 (LOC642198), mRNA.	LOC642198	0.00570683	-1.12917	0.13879		-0.049739	-0.0321231	-0.141791	-0.178882	-0.14429	-0.0326961	-0.0662479	-0.0791831	-0.224237	0.0287838	-0.0141592	0.0156899	-0.529156	0.116568	-0.0366205	-0.134	-0.0508385	0.372025	0.439942	0.0309372	0.0518432	0.0981518	-0.100118	0.278674	0.0896924	0.210487	0.00112248	0.0154999	0.0595953	0.189153	-0.152801
ILMN_2347314	NM_178426	aryl hydrocarbon receptor nuclear translocator (ARNT), transcript variant 2, mRNA.	ARNT	0.00293623	-1.12926	0.124909		-0.0830466	0.167832	-0.132738	-0.0536244	0.228371	-0.142589	-0.219994	-0.0464617	-0.0153212	-0.0974325	-0.448438	-0.203979	-0.212969	-0.0231439	-0.0996659	-0.0478862	0.155349	0.0925073	0.0464148	0.0568416	0.0238005	-0.15704	0.162867	0.157157	0.165395	0.290639	0.307563	-0.140359	0.133803	0.150451	0.124974
ILMN_1685676	NM_173810	tetratricopeptide repeat domain 9C (TTC9C), mRNA.	TTC9C	0.00029115	-1.12955	0.072806		0.201221	-0.102836	-0.272185	-0.0816719	-0.0185585	-0.00448917	-0.256475	-0.0448382	-0.160465	-0.0554377	-0.0449934	-0.139609	-0.253788	-0.1282	0.115461	-0.110626	0.151818	0.075426	-0.216484	-0.00255929	0.256145	0.0801858	0.154677	0.0360584	0.160511	0.109172	0.0641195	0.203939	0.0673528	0.156185	0.0320776
ILMN_1675186	NM_002396	malic enzyme 2, NAD(+)-dependent, mitochondrial (ME2), nuclear gene encoding mitochondrial protein, mRNA.	ME2	0.00611431	-1.12962	0.140468		0.0664599	-0.190109	-0.0028166	-0.0244583	0.118978	0.0246155	-0.252804	-0.059697	-0.304409	-0.570084	0.00189365	-0.187993	0.0255023	-0.0028166	0.146375	-0.121088	-0.0592862	0.12973	0.0275083	0.0768029	0.222423	-0.22775	-0.00896092	0.183608	0.131094	0.322533	0.149211	-0.0324767	0.146984	-0.0324767	0.286251
ILMN_2408877	NM_170606	myeloid/lymphoid or mixed-lineage leukemia 3 (MLL3), mRNA.	MLL3	0.00123957	-1.12994	0.107431		0.00854687	-0.106162	-0.154643	-0.34708	0.258787	-0.108581	-0.192833	-0.0405043	-0.0948664	-0.229511	-0.173562	-0.187589	-0.0289058	0.0427873	0.0971879	0.0334392	0.043487	0.186165	-0.0516566	-0.05041	0.0915265	-0.164839	0.0854718	0.0557663	0.269393	-0.0961638	0.23625	0.0836886	0.146213	0.0578028	0.32855
ILMN_1754145	NM_005898	cell cycle associated protein 1 (CAPRIN1), transcript variant 1, mRNA.	CAPRIN1	0.00414018	-1.1303	0.13306		-0.161572	-0.1325	-0.119303	0.163296	0.0558531	0.0581304	-0.419135	0.0751272	-0.140081	-0.284162	-0.417396	0.014248	-0.0605951	0.0213941	0.0968492	0.161455	-0.0722673	0.259496	0.0979896	-0.0248065	0.0908875	-0.195901	0.128609	0.413174	-0.049993	0.0638047	0.13649	-0.0211597	0.0750397	0.0876504	0.121333
ILMN_1675462	NM_007080	LSM6 homolog, U6 small nuclear RNA associated (S. cerevisiae) (LSM6), mRNA.	LSM6	0.00384297	-1.13031	0.131475		0.285064	-0.0940639	-0.166213	-0.144725	0.00878696	0.00727594	-0.0761588	0.0408373	-0.158492	-0.179689	-0.251635	-0.122309	-0.0739863	-0.403517	0.0484694	0.0196237	-0.128621	-0.0899358	0.0316725	0.0186829	0.190664	0.0468777	-0.0451115	-0.0372499	0.0107663	0.502552	0.126096	0.0601631	0.111998	0.284765	0.239144
ILMN_2286870	NM_139062	casein kinase 1, delta (CSNK1D), transcript variant 2, mRNA.	CSNK1D	0.00495791	-1.13117	0.135711		0.1897	-0.116108	-0.190609	-0.0437243	-0.134189	0.031853	-0.0998109	-0.19509	-0.0499038	-0.433231	-0.416366	0.054248	0.110094	0.095087	-0.0167321	0.16422	0.48689	0.163431	0.0157939	-0.0528058	0.0653261	0.110929	0.130794	0.225679	0.0722475	0.164522	0.027273	-0.166181	0.117667	-0.0443254	0.103395
ILMN_1674560	NM_020944	glucosidase, beta (bile acid) 2 (GBA2), mRNA.	GBA2	0.00207941	-1.13136	0.118502		0.119751	-0.208721	-0.0862001	-0.0359636	-0.0875101	-0.0583872	-0.16504	-0.228135	-0.157799	-0.16914	-0.246317	-0.127051	-0.171771	0.347424	-0.0976723	0.024261	0.193637	-0.127203	0.0311824	-0.131793	0.0970479	0.0759883	0.290913	0.223742	0.25886	0.0736833	0.121854	0.237723	0.128837	0.159795	-0.081887
ILMN_1656386	NM_014822	SEC24 related gene family, member D (S. cerevisiae) (SEC24D), mRNA.	SEC24D	0.00631326	-1.13142	0.140543		0.0347852	-0.11501	-0.0653374	-0.022522	0.0870128	0.0107169	-0.0540203	-0.0266588	-0.174511	-0.222837	-0.0421321	-0.581077	-0.0441392	0.0304204	-0.0350192	-0.0767965	-0.0324272	-0.118008	-0.157743	-0.12185	0.131075	0.215189	0.106236	0.420409	0.0579573	0.210243	0.219324	0.0762496	0.303575	0.0778989	0.312654
ILMN_3199755	XM_929781	PREDICTED: similar to beta-actin (LOC646821), mRNA.	LOC646821	0.00330278	-1.13188	0.126429		0.0278781	-0.190109	-0.220517	-0.0053594	0.0370824	0.123859	-0.181024	0.043907	-0.153699	-0.435057	-0.158253	-0.167953	-0.216129	0.122044	-0.0177297	0.0725361	-0.0705232	0.113056	-0.308275	0.237413	-0.0203335	-0.0645166	0.215757	0.0961945	0.0315248	0.206939	0.117938	0.317855	0.242559	0.0734854	0.126781
ILMN_2363231	NM_021940	small ArfGAP 1 (SMAP1), transcript variant 2, mRNA.	SMAP1	0.00264695	-1.13275	0.124049		-0.108979	-0.0196374	0.0132831	-0.439563	-0.171331	0.0188506	-0.1075	0.000880226	-0.0191064	-0.252964	-0.211645	-0.23827	-0.0268884	0.16876	-0.0656142	0.339197	0.118125	0.0685625	-0.00315378	-0.118234	-0.0263786	-0.0976438	0.281873	0.34316	-0.043921	0.202985	0.13268	0.0190898	0.227178	-0.00878342	-0.00480428
ILMN_1691117	NM_052951	deoxynucleotidyltransferase, terminal, interacting protein 1 (DNTTIP1), mRNA.	DNTTIP1	0.00801805	-1.13326	0.148824		0.141805	-0.24568	-0.485174	-0.172215	0.139563	0.145394	0.0205151	-0.241659	0.0213162	-0.370436	-0.175656	0.00957331	-0.0748662	0.128687	-0.118465	-0.123635	0.179841	0.117563	0.190838	0.026693	0.262854	0.253152	0.276165	0.0680665	0.047625	0.208888	-0.127473	-0.0538749	0.247095	-0.0437969	0.249363
ILMN_1667429	NM_000387	solute carrier family 25 (carnitine/acylcarnitine translocase), member 20 (SLC25A20), nuclear gene encoding mitochondrial protein, mRNA.	SLC25A20	0.00513627	-1.1333	0.136472		-0.24694	-0.211871	0.025728	-0.0663002	0.180366	-0.113864	-0.245646	-0.0458571	-0.28031	-0.197738	-0.0950054	-0.262366	0.0767083	0.00146286	0.170132	0.306263	-0.000264726	0.144145	-0.0847376	-0.283507	0.044298	-0.0578922	0.162614	0.0381216	-0.31377	0.0387278	0.17123	0.222477	0.25457	0.301769	0.155799
ILMN_1776838	XR_015405	PREDICTED: hypothetical protein LOC728895 (LOC728895), mRNA.	LOC728895	4.55335e-05	-1.13344	0.0419519		-0.0848725	-0.0642383	-0.299493	-0.0588031	-0.0388264	-0.0396105	-0.191742	0.0463319	-0.0799682	-0.190164	-0.108979	-0.228007	-0.0471941	-0.0499481	0.0929982	-0.133092	0.0776722	-0.0286386	0.108034	0.0282039	0.0482066	0.286622	0.0587736	0.0710124	0.214695	-0.139368	0.192615	0.0328277	0.0981972	0.219987	0.10019
ILMN_1655608	NM_025010	kelch-like 18 (Drosophila) (KLHL18), mRNA.	KLHL18	0.000504551	-1.13362	0.0832933		0.134715	-0.082135	-0.231834	-0.029032	-0.0357228	-0.0107963	-0.247034	-0.177179	-0.0883669	-0.16696	-0.326063	-0.253046	0.0862032	0.140175	-0.018398	0.0688082	0.256367	0.106753	-0.0728256	0.112478	0.0775243	0.127515	0.220722	0.217427	0.1005	-0.0220818	-0.036164	0.151638	-0.0735419	0.247406	0.0489612
ILMN_1753165	NM_018979	WNK lysine deficient protein kinase 1 (WNK1), mRNA.	WNK1	0.00079156	-1.13401	0.0951258		-0.225209	0.0462013	-0.344622	-0.170947	0.029119	-0.00774426	-0.106666	-0.190114	-0.252512	-0.051755	-0.122926	-0.135431	0.016552	0.14746	0.0375837	0.0318909	0.0649115	0.0514539	0.0205749	-0.0829043	0.00790822	0.0468325	0.294953	0.161577	0.0633743	0.421689	0.137534	0.237051	-0.0517498	0.0669745	-0.0871529
ILMN_3255792	XM_001723239	PREDICTED: similar to hCG2021201 (LOC100128505), mRNA.	LOC100128505	0.0017645	-1.13413	0.116861		0.243604	-0.0801442	-0.0439741	-0.010186	-0.0508618	-0.233821	-0.14357	-0.0350589	-0.0732064	-0.150924	-0.402155	-0.260749	-0.0295876	-0.113723	0.0450917	0.0161967	0.105688	0.189961	-0.0732064	-0.0420648	0.189961	-0.0439741	0.0973463	0.0973463	0.499779	-0.150924	-0.0295876	0.150072	0.0871045	0.150072	0.116993
ILMN_1778662	NM_206890	DIP2 disco-interacting protein 2 homolog A (Drosophila) (DIP2A), transcript variant 3, mRNA.	DIP2A	0.000252674	-1.13437	0.0718438		-0.0294434	0.0800346	-0.0251838	-0.23031	-0.112644	-0.0374127	-0.17165	-0.0109301	-0.310103	-0.156256	-0.126387	-0.161708	-0.10152	-0.0127839	0.131421	-0.0913365	-0.0750832	0.00501264	0.0382736	0.0291305	0.141198	-0.0375313	0.414631	0.256919	-0.040804	0.0984987	0.151148	0.00109239	-0.0186702	0.178658	0.20201
ILMN_1756289	NM_032103	protein phosphatase 1, regulatory (inhibitor) subunit 12B (PPP1R12B), transcript variant 3, mRNA.	PPP1R12B	0.00580202	-1.13492	0.13879		0.181824	0.0175521	-0.332928	-0.0748866	0.124439	-0.0776642	-0.284894	-0.218288	-0.245571	0.0240634	-0.472423	-0.150701	0.1483	-0.054823	0.0787053	-0.0307934	0.0956309	0.358874	0.175006	0.236963	0.223968	-0.0970718	-0.197566	0.0666562	-0.047775	-0.116744	0.125824	0.183309	0.115808	-0.00323305	0.217095
ILMN_1774259	NM_001040450	family with sequence similarity 63, member B (FAM63B), transcript variant 1, mRNA.	FAM63B	0.000730567	-1.13499	0.0932123		-0.000438588	-0.200602	0.0266517	0.182934	-0.0268566	-0.0349068	-0.110839	-0.0779168	0.0201264	-0.305491	-0.199871	-0.249189	-0.347842	-0.0164605	0.00534329	0.035405	0.0372859	0.136306	0.284685	0.298603	0.101884	0.095658	0.0667766	-0.159349	0.118772	0.137061	0.156897	0.140227	-0.106459	0.183118	-0.0547378
ILMN_1664706	XM_497711	PREDICTED: similar to H3 histone, family 2 isoform 2 (LOC653604), mRNA.	LOC653604	0.00576345	-1.13559	0.13879		0.221536	-0.307988	-0.400732	-0.153874	0.0113132	-0.19442	-0.165235	-0.0771923	0.0176828	-0.0856994	0.0822862	-0.264744	-0.0428968	0.0613197	-0.0260083	0.00263031	0.0789567	0.180116	-0.263048	-0.216985	0.00525172	0.257551	-0.0409008	0.126997	0.21314	-0.0256989	0.352433	0.206605	0.19461	0.240158	0.255698
ILMN_1651504	NM_003704	family with sequence similarity 193, member A (FAM193A), mRNA.	FAM193A	0.0061978	-1.13594	0.140468		0.000769107	0.137386	-0.174669	-0.0621963	-0.0860364	0.17031	-0.0134982	-0.124274	-0.211869	-0.404398	-0.686446	0.106158	-0.0536838	0.0629207	-0.0375264	0.0415922	0.140316	0.0895933	-0.0785268	0.0251194	0.00677258	0.288345	0.148752	0.231436	0.0740047	-0.0353436	0.058135	0.149572	0.0682523	0.294171	0.0348936
ILMN_2336280	NM_206853	quaking homolog, KH domain RNA binding (mouse) (QKI), transcript variant 2, mRNA.	QKI	0.00615324	-1.13601	0.140468		0.0191424	-0.157801	-0.0998297	-0.222377	0.21451	-0.130702	-0.217307	-0.220889	-0.0146815	-0.276943	-0.354697	-0.148522	0.0402491	0.188278	0.024659	-0.194359	-0.0838838	0.245298	-0.149273	-0.0899826	0.16571	0.168631	0.329077	0.460901	0.100119	-0.0830941	0.14626	0.0181782	0.217611	0.0438356	0.130306
ILMN_1656184	NR_003563	phosphatidylinositol 4-kinase, catalytic, alpha pseudogene 1 (PI4KAP1), non-coding RNA.	PI4KAP1	0.00418865	-1.1367	0.133179		-0.123751	-0.086842	-0.311971	-0.0741862	-0.076485	-0.11479	-0.14665	0.119085	0.0941373	-0.150553	-0.229511	-0.355695	-0.100952	0.0946516	-0.0111416	0.0912014	-0.0507785	0.102685	-0.196087	0.022185	0.0342338	-0.0307329	0.549711	0.273141	0.292378	-0.198859	0.123703	0.222328	0.00604486	0.0946922	0.0407429
ILMN_3281039	XR_016221	PREDICTED: misc_RNA (LOC642909), miscRNA.	LOC642909	0.00539094	-1.13747	0.13802		0.285843	-0.0193255	-0.447486	-0.372417	-0.0155651	-0.225545	0.087054	0.11964	0.0686522	-0.175623	-0.00970956	-0.214844	-0.200613	-0.123082	0.0729767	-0.0528602	0.0247449	0.131675	0.0940921	0.0820063	0.0516279	0.192083	-0.0248193	-0.00980453	-0.224216	0.214689	0.324239	0.0755857	0.179418	0.129979	0.388236
ILMN_1810045	NM_014922	NLR family, pyrin domain containing 1 (NLRP1), transcript variant 2, mRNA.	NLRP1	0.00538679	-1.13763	0.13802		0.273842	-0.0152329	-0.0988646	-0.0317761	-0.105598	-0.188191	-0.241834	-0.0957531	-0.130263	-0.468113	-0.0452082	-0.434751	0.0172563	0.208797	0.144172	-0.0376847	0.123478	0.10006	-0.227522	-0.0122669	0.164516	-0.0403711	0.337252	0.0798687	0.00997085	-0.00337577	0.0971837	0.0723254	0.315933	0.254471	0.138307
ILMN_2133784	NM_212555	prostate and testis expressed 2 (PATE2), mRNA.	PATE2	0.00816869	-1.13811	0.149854		0.269776	0.0242181	-0.182262	-0.213267	-0.132375	-0.185934	0.0897443	0.0798561	-0.17545	-0.133139	-0.466484	-0.040132	-0.260851	-0.117514	0.023686	0.244159	0.211602	0.295341	-0.236627	-0.182788	0.145884	0.411895	0.106761	-0.117052	0.138304	0.0219825	-0.215849	0.242008	0.143718	0.076885	0.109685
ILMN_1810941	NM_000754	catechol-O-methyltransferase (COMT), transcript variant MB-COMT, mRNA.	COMT	0.000145157	-1.13822	0.0556331		-0.181667	-0.294699	0.0758614	-0.0387243	-0.0324555	-0.277974	-0.160483	0.00872889	-0.0544102	-0.187784	-0.214461	-0.136133	-0.0751666	0.0799623	-0.15688	0.0255648	0.0135302	0.237147	0.0329035	0.145402	0.222394	-0.00459482	0.109593	0.107042	-0.02422	-0.0529111	0.0794435	0.063429	0.325357	0.084101	0.159346
ILMN_1809585	NM_182686	KIAA0319-like (KIAA0319L), transcript variant 2, mRNA.	KIAA0319L	0.00478142	-1.13845	0.135711		0.110398	-0.0901645	-0.0896199	0.140411	-0.106543	-0.312851	-0.487689	0.0947467	0.116293	-0.355847	-0.266614	-0.0234433	-0.10898	-0.0214387	-0.0422089	-0.0264051	0.0993498	0.176426	-0.297138	-0.0553835	0.0802385	0.0188267	0.0919132	0.376965	0.223077	0.122286	0.209468	0.184871	0.146418	0.0391065	0.130774
ILMN_2410771	NM_012289	kelch-like ECH-associated protein 1 (KEAP1), transcript variant 2, mRNA.	KEAP1	0.00775369	-1.1396	0.147587		-0.117126	-0.386427	0.0518109	-0.19575	-0.1795	-0.0524981	0.069387	0.222976	-0.102848	-0.155895	-0.594073	-0.000453763	-0.135458	0.0748258	-0.219798	-0.0158195	0.184862	0.178671	0.098379	-0.199684	0.234896	0.1446	0.33659	0.0759149	0.0197901	0.300747	0.0292728	-0.0531483	0.284078	-0.00604731	-0.0110614
ILMN_3205656	XR_016557	PREDICTED: misc_RNA (LOC391075), miscRNA.	LOC391075	0.00461417	-1.1399	0.135711		-0.592535	-0.138161	-0.0587514	-0.217869	-0.0339482	-0.122334	0.234851	0.102636	-0.0169534	-0.106373	0.0130447	-0.0855056	-0.227354	-0.216522	-0.146301	0.0964539	0.248531	0.307552	0.223985	0.0765846	0.264185	0.0524099	-0.139362	0.151514	0.0591539	0.0973984	-0.140341	0.0238476	-0.018532	-0.046027	0.320498
ILMN_1733560	NM_016630	spastic paraplegia 21 (autosomal recessive, Mast syndrome) (SPG21), transcript variant 1, mRNA. XM_945612 XM_945613 XM_945615 XM_945617 XM_945619 XM_945622	SPG21	0.00453532	-1.14038	0.135711		-0.0443354	-0.0113152	-0.0148748	-0.00107241	0.0151246	-0.276835	-0.134005	-0.278336	-0.11973	-0.55484	0.331821	-0.309687	-0.198923	0.148483	-0.00600219	0.00286031	0.095955	0.21707	-0.0202356	0.101108	0.0523608	-0.147437	0.122589	0.257829	0.106042	-0.0896729	0.0826183	0.229518	0.287584	0.02621	0.144529
ILMN_1790917	NM_080731	hypothetical protein LOC25900, isoform 3 (HOM-TES-103), transcript variant 3, mRNA.	HOM-TES-103	0.00149622	-1.14043	0.113776		-0.148717	-0.165466	-0.167262	-0.0232154	-0.0614884	0.0664171	-0.32137	-0.106431	-0.0982738	-0.367032	0.00258858	-0.136284	-0.137325	0.212093	0.0769718	0.106259	0.0248821	0.118943	-0.183963	-0.0540368	0.102205	-0.217093	0.343807	0.160732	0.204342	-0.0961335	0.219124	0.0451063	0.203918	0.246795	0.158119
ILMN_2376458	NM_172249	colony stimulating factor 2 receptor, alpha, low-affinity (granulocyte-macrophage) (CSF2RA), transcript variant 6, mRNA.	CSF2RA	0.0034923	-1.14043	0.128564		0.239715	-0.00971387	-0.128741	-0.134	-0.120145	-0.215263	-0.257411	-0.0423718	-0.133208	-0.200075	-0.293248	-0.0295787	-0.0998851	-0.0226653	0.0254081	-0.0112804	0.192518	0.199368	-0.274995	0.128657	0.210324	0.0932934	0.0329732	-0.188388	0.343199	-0.256643	0.243852	0.0254081	0.30648	0.286944	0.109205
ILMN_1756998	XM_936748	PREDICTED: similar to dicer1 (LOC647691), mRNA.	LOC647691	0.00177095	-1.14072	0.116861		0.158174	-0.0865366	-0.356908	-0.231093	-0.0865366	-0.331339	-0.350846	-0.0465173	-0.0962766	-0.117304	-0.0846694	-0.0268637	0.312859	0.0487746	0.0165973	0.0596867	-0.00631748	-0.0129755	0.11776	0.014035	-0.0274718	0.322821	0.2215	0.190773	0.232599	0.0752445	0.0853822	-0.117835	0.212119	0.14874	0.123867
ILMN_1786139	NM_024006	vitamin K epoxide reductase complex, subunit 1 (VKORC1), transcript variant 1, mRNA.	VKORC1	0.00651282	-1.14109	0.1411		0.0646376	0.17063	-0.115545	-0.360319	-0.0456047	-0.271157	-0.256051	0.137906	-0.312646	0.00656447	0.0837873	-0.321499	-0.377702	0.221676	-0.0522984	-0.0355955	-0.030118	0.0563107	-0.204869	-0.00182931	0.096159	0.232767	0.222708	0.0882293	0.228968	0.218979	-0.0754814	0.0792333	0.150286	0.290962	0.302642
ILMN_1777444	NM_003164	syntaxin 5 (STX5), mRNA.	STX5	0.00218324	-1.1411	0.118516		0.0476874	-0.0348151	-0.131812	-0.342132	0.0998674	-0.237312	-0.160173	-0.173376	-0.123085	0.123405	-0.206834	-0.350847	-0.0616087	0.17236	0.134605	0.0338054	-0.0405581	-0.0474439	-0.066628	-0.0923085	0.116237	0.0648765	0.0600335	0.397675	0.126371	0.233118	0.317346	0.213218	0.125366	0.160996	-0.173617
ILMN_1704261	NM_016492	RAN guanine nucleotide release factor (RANGRF), mRNA.	RANGRF	0.00144894	-1.14118	0.112053		-0.0286528	-0.060717	-0.123952	-0.254443	0.0193084	0.0621623	-0.19195	0.137677	-0.252653	-0.12873	-0.116556	-0.131981	-0.189468	-0.213775	0.167696	0.00680983	0.121259	0.147286	0.121228	0.135763	0.223838	0.270438	-0.0215558	-0.165926	0.322286	-0.257983	0.146544	0.0155897	-0.223254	0.164254	0.275195
ILMN_1681972	NM_016486	transmembrane protein 69 (TMEM69), mRNA.	TMEM69	0.00515107	-1.14151	0.136472		-0.350413	-0.281519	-0.319588	0.169618	-0.00164798	-0.251304	-0.08874	-0.0935109	0.131137	-0.37201	-0.282951	-0.109783	0.0194142	0.276104	-0.267918	0.0164957	0.0207103	0.0631653	0.0235843	0.342359	0.0174066	-0.0580861	0.187663	-0.017259	0.240897	0.182132	0.138543	-0.0366676	0.161178	0.18631	0.157027
ILMN_3224758	XR_018705	PREDICTED: misc_RNA (LOC92755), miscRNA.	LOC92755	0.00104177	-1.14223	0.100197		-0.333767	-0.00717812	-0.296988	0.0800804	0.00187453	-0.018108	-0.138592	0.0227807	-0.161879	-0.0316232	-0.486385	-0.24702	0.0375039	0.143624	-0.103812	0.322546	0.0148597	0.0560814	-0.00358728	0.0073109	0.115988	0.116898	0.087181	0.0900699	0.130088	0.118296	0.107084	0.178321	-0.0416944	0.29903	0.0234551
ILMN_3247533	XM_001714384	PREDICTED: similar to hCG1994151 (LOC100133840), mRNA.	LOC100133840	0.00708494	-1.14281	0.14434		0.00194931	-0.040593	0.0530327	-0.0281886	0.379105	-0.376388	-0.237589	-0.187712	-0.0232238	-0.313212	-0.0486414	-0.505102	-0.236651	0.0836493	0.0792324	0.159227	-0.0874966	0.153265	-0.0698941	-0.00535726	0.0675571	-0.0333548	0.221367	0.221367	0.306734	-0.265358	0.212043	0.188153	0.053867	0.0692831	0.206666
ILMN_3242551	XM_001713657	PREDICTED: hypothetical protein LOC100130707 (LOC100130707), mRNA.	LOC100130707	0.00684195	-1.14286	0.142262		-0.182761	-0.0922915	-0.221319	0.12192	-0.121499	0.0572214	-0.104928	-0.0271321	-0.242634	-0.314868	-0.22074	-0.125889	-0.384901	0.332741	-0.285642	-0.165605	-0.0376456	-0.0289591	0.0809566	0.0983305	0.350895	-0.0936361	0.158572	0.106908	0.229362	-0.0350968	0.249336	0.1747	0.106495	0.426166	0.0855445
ILMN_1675674	NM_006048	ubiquitination factor E4B (UFD2 homolog, yeast) (UBE4B), mRNA.	UBE4B	0.00596624	-1.1429	0.139626		0.0320902	-0.171971	-0.443816	0.0222265	0.0434207	0.18215	-0.0967211	-0.071802	-0.141782	-0.364402	-0.531448	-0.0283026	0.201762	0.109213	-0.0150749	0.247751	0.170817	0.286532	-0.0761992	-0.109842	0.0160325	0.153143	0.280024	0.271002	0.0587913	-0.0633798	0.042237	-0.0136613	0.23184	0.121915	0.144699
ILMN_3301585	XR_038168	PREDICTED: misc_RNA (LOC730993), miscRNA.	LOC730993	0.00500554	-1.14296	0.135711		-0.0580274	0.0570827	-0.0714438	-0.128	-0.13912	-0.380728	-0.0724705	-0.204	-0.0422716	0.177369	-0.335964	-0.212775	0.0142062	0.0100654	-0.128976	-0.0276784	0.206273	0.211337	0.0265661	0.155931	0.0091267	0.353285	-0.180912	-0.156698	0.409616	-0.225223	0.01209	0.172646	0.250222	0.22791	0.278535
ILMN_1780298	NM_201598	family with sequence similarity 86, member A (FAM86A), transcript variant 2, mRNA.	FAM86A	0.00626659	-1.14298	0.140468		0.0468497	0.0450422	-0.462836	-0.129808	0.016182	-0.104621	-0.287959	0.0609721	0.139697	-0.0981696	-0.300789	-0.141984	-0.302528	-0.00958606	0.317043	0.0411828	-0.0393086	0.0461336	-0.144717	0.169528	0.245134	-0.227078	0.198288	0.0399715	0.422646	-0.244205	0.00472268	0.195956	-0.0190548	0.168561	0.245518
ILMN_2395285	NM_180703	U11/U12 snRNP 35K (U1SNRNPBP), transcript variant 4, mRNA.	U1SNRNPBP	0.0046618	-1.14339	0.135711		-0.0190256	-0.11829	-0.0793642	0.166572	-0.122897	-0.0849043	-0.0204993	-0.255588	-0.105078	-0.294803	-0.411986	-0.206265	-0.0990369	0.0756482	-0.0243954	-0.0527135	0.0178162	0.0137113	-0.397884	-0.0287803	0.0204107	-0.109739	0.268583	0.439162	0.293327	0.206948	0.0433684	0.29681	0.157737	0.0948795	0.133966
ILMN_2387505	NM_145730	adaptor-related protein complex 1, beta 1 subunit (AP1B1), transcript variant 2, mRNA.	AP1B1	0.0030904	-1.14392	0.124909		-0.02869	-0.198132	-0.19278	-0.0451187	0.000881075	-0.0956597	-0.301646	0.0230508	-0.0928841	0.0350683	-0.504899	-0.241287	-0.0679419	0.198791	0.102084	-0.0121981	0.0669169	-0.0153085	-0.0778223	-0.170854	0.188553	-0.0775921	0.275995	0.281512	0.300223	-0.136201	0.031845	0.218873	0.143888	0.346697	-0.00392144
ILMN_3295075	XM_001717228	PREDICTED: similar to hCG1644658 (LOC100131531), mRNA.	LOC100131531	0.000876556	-1.14447	0.0955633		0.0128971	-0.0655821	-0.279302	-0.103196	-0.0285429	0.0625652	-0.173887	-0.0982954	-0.13673	-0.137666	-0.43176	-0.179624	-0.226389	0.250421	-0.0823664	-0.0811061	0.124785	0.172139	-0.018311	-0.138154	0.119084	-0.0124466	0.223051	0.25485	-0.0723583	0.261063	0.172139	0.178167	0.213541	0.0481395	0.0833129
ILMN_2287888	NM_006503	proteasome (prosome, macropain) 26S subunit, ATPase, 4 (PSMC4), transcript variant 1, mRNA.	PSMC4	0.0020879	-1.14457	0.118502		0.049068	-0.0685847	-0.0451005	0.00593873	-0.0696468	-0.118305	0.120562	-0.206145	-0.160435	-0.157528	-0.520533	-0.385812	-0.0864905	0.0618099	-0.0400171	-0.0306054	0.164829	-0.0360226	0.0480961	-0.227907	0.177187	-0.0365751	0.310196	0.283949	0.204095	-0.0732752	0.225487	0.139961	0.221777	0.0633714	-0.00285635
ILMN_3300797	XR_015449	PREDICTED: similar to Eukaryotic translation elongation factor 1 alpha 1 (LOC729090), mRNA.	LOC729090	0.00243767	-1.14532	0.120328		0.186781	0.0175692	0.128699	-0.129894	-0.150598	-0.446303	-0.150598	-0.0264292	-0.000307236	0.016668	-0.236749	-0.3661	-0.154098	-0.24096	0.167574	-0.00388121	0.244269	0.255349	-0.259996	0.0364307	0.197573	0.251493	-0.047317	0.0982	0.149611	-0.00388121	-0.0974707	0.105395	0.119231	-0.0620235	0.292195
ILMN_2124064	NM_002908	v-rel reticuloendotheliosis viral oncogene homolog (avian) (REL), mRNA.	REL	0.00210129	-1.1461	0.118502		0.0685865	-0.0539288	-0.433997	0.0333554	0.158083	-0.267367	-0.206683	0.0040262	-0.0326612	-0.311653	-0.150648	-0.227659	-0.0317231	-0.0230879	0.151659	0.0746105	0.110881	0.00591691	-0.188238	-0.0457747	0.0899451	-0.198199	0.415068	0.172794	0.239416	-0.0390575	0.202292	0.099391	0.0148106	0.27072	0.17679
ILMN_1676036	XM_945045	PREDICTED: similar to Tubulin beta-4q chain, transcript variant 2 (LOC649679), mRNA.	LOC649679	0.00713457	-1.14628	0.14434		0.0932216	0.165001	-0.365033	0.0750332	0.220233	-0.0699005	-0.206584	-0.0517705	-0.368402	-0.239337	-0.393268	0.0869225	-0.192882	-0.171052	-0.011064	0.0799754	0.0253018	0.128238	0.0255853	0.0602351	0.00705072	-0.00821726	-0.163628	0.168362	-0.00145822	0.572659	0.039098	-0.0338441	0.221624	0.396609	0.120118
ILMN_1718831	NM_018202	transmembrane protein 57 (TMEM57), mRNA.	TMEM57	0.00349953	-1.14655	0.128564		-0.156107	0.015207	-0.156705	0.028062	-0.112279	0.0316805	-0.338832	0.0423844	-0.14926	-0.232815	-0.573129	-0.0804142	0.0725074	-0.00596579	-0.0924716	0.214136	0.105941	0.00331808	0.15344	-0.0631659	-0.0571954	-0.0700151	0.0777987	0.0790546	0.0867203	0.464127	0.0388331	-0.0249683	0.413681	0.188279	-0.125411
ILMN_2209551	NR_002804	sialic acid binding Ig-like lectin, pseudogene 3 (SIGLECP3), non-coding RNA.	SIGLECP3	0.00207938	-1.14682	0.118502		0.0558056	-0.133327	-0.0987777	-0.202073	-0.0458434	-0.064701	-0.158755	0.0238246	-0.110182	-0.246026	-0.0681673	-0.25158	-0.265482	0.0462139	-0.0197297	0.1388	0.0995652	0.0260071	-0.166022	0.0443726	0.0509361	0.0367738	0.652558	0.410474	0.0652672	-0.190401	0.097415	-0.0400973	0.139906	0.0958943	0.0736429
ILMN_3237627	NR_015421	hypothetical LOC154761 (LOC154761), non-coding RNA.	LOC154761	0.00683674	-1.14754	0.142262		-0.575623	0.118963	-0.0716538	-0.270737	0.0219723	0.00114959	-0.0831953	-0.165766	-0.138786	0.0620666	-0.205606	0.0204971	-0.27752	-0.071904	0.129757	-0.0311578	-0.202281	-0.144136	0.14749	-0.259829	-0.0639167	-0.0746368	0.32178	0.341208	0.267623	0.00966213	0.0775922	0.327245	0.0291163	0.348666	0.164287
ILMN_2190779	NM_032177	phosphorylated adaptor for RNA export (PHAX), mRNA.	PHAX	0.00201163	-1.14812	0.118502		-0.0448843	-0.227368	-0.304684	-0.225812	-0.0432177	-0.231522	-0.0762382	-0.25337	-0.177512	-0.0455043	0.0479859	-0.33472	0.0246572	0.317228	0.023391	-0.161615	0.208065	0.0814281	0.0442125	-0.0792224	0.0377792	-0.109667	0.064756	-0.0759215	0.330212	-0.000127433	0.229279	0.0784415	0.344595	0.220531	0.239021
ILMN_1724230	XM_943005	PREDICTED: similar to FRG1 protein (FSHD region gene 1 protein), transcript variant 8 (LOC642236), mRNA.	LOC642236	0.00798989	-1.14817	0.148824		-0.217956	-0.116521	0.0311868	-0.181031	-0.236823	-0.107013	-0.0672608	-0.156794	-0.0308471	0.458364	0.132306	-0.350906	-0.299704	-0.166922	-0.0219258	-0.0861559	-0.133098	0.0742044	-0.29777	0.00614884	0.343807	3.9526e-05	0.042194	0.105619	0.274187	0.24027	0.134771	0.396888	0.172135	0.232474	0.314408
ILMN_1698470	NM_032796	synapse associated protein 1, SAP47 homolog (Drosophila) (SYAP1), mRNA.	SYAP1	0.00298493	-1.14834	0.124909		0.34317	-0.199895	-0.234635	-0.194049	0.130032	0.154271	0.0125788	-0.284908	-0.248455	-0.215193	-0.365816	-0.26294	0.0601264	-0.134567	0.10122	0.030419	-0.0616506	-0.0288912	0.0264436	-0.0466211	0.107382	0.289856	0.0911286	-0.134906	0.100782	0.17138	0.0478349	0.0989571	0.199053	0.35552	0.29553
ILMN_1747204	NM_013247	HtrA serine peptidase 2 (HTRA2), nuclear gene encoding mitochondrial protein, transcript variant 1, mRNA.	HTRA2	0.000137314	-1.14856	0.054089		-0.0081639	-0.115179	-0.170858	-0.102693	-0.0295061	-0.186747	-0.25742	0.0406819	-0.1615	-0.355236	-0.0110631	-0.267345	0.044305	0.0870109	0.0689724	0.111307	0.251988	0.0544152	-0.0693177	-0.168747	0.000748895	0.0680362	0.000835791	0.198673	0.274391	0.0603509	0.0494634	0.149674	0.288836	0.12029	0.123423
ILMN_3211857	XM_937902	PREDICTED: similar to hCG2040565 (LOC648822), mRNA.	LOC648822	0.00266481	-1.14886	0.124049		-0.0113605	0.0334774	-0.00977299	-0.0488841	-0.188503	0.0449717	-0.314245	-0.00141727	-0.197502	-0.422084	-0.205204	-0.229173	0.0544121	0.0601589	-0.0508549	-0.0271649	-0.16508	-0.0676452	0.367352	-0.0515553	-0.0178696	0.255686	-0.0111226	0.0495702	0.194363	0.320432	0.217086	0.136641	-0.123237	0.401058	0.233183
ILMN_3263918	XM_001726072	PREDICTED: hypothetical protein LOC100129201 (LOC100129201), mRNA.	LOC100129201	0.00567742	-1.14897	0.13879		0.466689	-0.125364	-0.429134	0.0361727	0.169485	-0.174375	-0.275354	-0.288099	-0.170818	-0.424476	-0.0417152	-0.177116	-0.175361	0.137514	0.00956028	0.0868997	0.136801	0.130046	0.0626172	-0.0528453	0.071842	0.168945	0.127623	-0.0701606	0.0208391	0.336546	0.0273049	0.176508	0.27384	-0.101217	0.213298
ILMN_1668865	NM_153449	solute carrier family 2 (facilitated glucose transporter), member 14 (SLC2A14), mRNA.	SLC2A14	0.00436338	-1.15017	0.135395		0.242239	-0.152799	-0.392159	-0.217746	0.155451	-0.00605497	-0.0452958	-0.190656	0.0515509	-0.372305	-0.006589	-0.457943	0.0981175	-0.158397	0.0321847	0.160741	-0.162483	0.302686	0.163579	0.0238183	-0.0510461	0.0299703	-0.148908	0.0258858	0.194262	0.186896	0.304365	0.0634698	0.0360546	0.122358	0.383625
ILMN_2051408	NM_033109	polyribonucleotide nucleotidyltransferase 1 (PNPT1), mRNA.	PNPT1	0.00496787	-1.15102	0.135711		0.270976	-0.00805107	0.131252	0.0563344	-0.103301	-0.387214	-0.282633	-0.191117	0.0543274	0.0323647	-0.613563	-0.121177	-0.215163	-0.173928	-0.0522846	0.314837	0.250772	0.0767032	-0.118565	0.107742	0.15739	0.134479	0.100955	0.261544	0.0659113	-0.194095	0.11442	0.0767032	-0.00805107	0.293381	-0.0154748
ILMN_1730061	NM_015151	DIP2 disco-interacting protein 2 homolog A (Drosophila) (DIP2A), transcript variant 1, mRNA.	DIP2A	0.00319917	-1.15127	0.125163		-0.224795	-0.0776842	-0.184562	0.0559136	0.068262	-0.0497155	-0.129868	-0.274345	-0.242784	-0.356097	-0.227319	-0.0630129	-0.148768	0.226833	0.194039	0.00957434	-0.286969	0.0691008	-0.10896	-0.0587914	0.0760203	-0.0248353	0.504012	0.192495	0.209997	0.0503418	0.279361	0.29024	0.0155922	0.192758	-0.125892
ILMN_3303295	XR_016043	PREDICTED: misc_RNA (LOC731969), miscRNA.	LOC731969	0.00496177	-1.15156	0.135711		-0.24967	-0.0214723	0.107081	0.32506	-0.191216	-0.388295	-0.344651	-0.207307	-0.0229891	-0.206198	-0.357507	0.119785	-0.00359132	-0.173688	-0.197111	0.391628	0.516651	-0.110131	0.0504205	0.150663	0.114955	0.0492181	0.12093	0.0370932	0.0438874	0.0754207	0.032827	0.163089	-0.0100419	-0.0192881	0.0901197
ILMN_1789342	NM_004550	NADH dehydrogenase (ubiquinone) Fe-S protein 2, 49kDa (NADH-coenzyme Q reductase) (NDUFS2), mRNA.	NDUFS2	0.000668026	-1.15167	0.0927045		-0.252712	-0.241821	-0.170029	0.00427646	-0.0866485	-0.035501	-0.201861	-0.169431	-0.0408601	-0.104933	-0.100571	-0.19972	-0.27191	0.348494	-0.0100132	-0.177771	-0.134414	0.0240966	-0.0891243	-0.00432756	0.21103	0.0998304	0.153998	0.143425	0.171159	0.21205	0.0896832	0.267604	0.297165	0.134986	0.224459
ILMN_1724490	NR_003272	paraspeckle component 1 (PSPC1), transcript variant beta, transcribed RNA.	PSPC1	0.00291972	-1.15204	0.124909		0.0277028	-0.0756279	0.0168704	-0.185486	0.00834957	-0.0294461	-0.0211873	-0.00600603	-0.195401	-0.354141	-0.399259	-0.525539	0.0221819	0.132987	-0.0585427	-0.00498776	0.0101365	0.0113051	0.00476914	-0.214441	-0.0590315	-0.0638462	0.135397	0.323879	0.302042	0.229043	0.068453	0.185806	0.300667	0.27264	0.104523
ILMN_1696485	NM_031266	heterogeneous nuclear ribonucleoprotein A/B (HNRNPAB), transcript variant 1, mRNA.	HNRNPAB	0.00707294	-1.15206	0.14434		-0.381534	-0.176408	-0.21782	-0.11678	0.0307783	0.0242359	0.0260533	0.0530836	-0.0120274	-0.194644	-0.566976	-0.243213	-0.220643	0.388065	-0.0822338	0.0661787	0.0496757	-0.0323246	0.0388062	-0.0905093	-0.0178075	-0.0526545	0.265102	0.56727	0.181156	0.156946	0.171043	-0.00565718	0.227573	0.0825822	-0.00589433
ILMN_1712357	NM_031263	heterogeneous nuclear ribonucleoprotein K (HNRPK), transcript variant 3, mRNA.	HNRPK	0.00680917	-1.15275	0.142262		0.128366	0.032356	-0.325513	-0.000940599	0.121762	-0.314282	-0.170113	-0.103119	-0.0198849	-0.489305	-0.722147	0.138855	-0.0221874	0.15657	-0.0081379	-0.0753501	0.198249	-0.0139151	9.28827e-05	0.169323	0.0623211	-0.024633	0.358838	0.159204	0.200121	0.183515	0.0141344	0.0230569	0.133257	0.128531	0.0475291
ILMN_1785703	NM_198271	leiomodin 3 (fetal) (LMOD3), mRNA.	LMOD3	0.00778271	-1.15297	0.147743		0.358201	-0.0410045	-0.0993779	0.0575134	0.0234384	-0.335086	-0.181931	-0.312933	-0.222887	-0.0225255	-0.285447	-0.386621	-0.171646	0.136122	-0.107223	0.0731356	-0.113011	0.0317857	-0.100652	-0.160665	0.0232156	0.054596	0.123043	0.10833	0.436033	-0.0351748	0.105927	0.425243	0.431308	0.278945	0.113991
ILMN_1731203	NM_020954	ring finger protein 213 (RNF213), transcript variant 2, mRNA.	RNF213	0.000429799	-1.15342	0.0830069		0.33564	-0.0529109	-0.192444	-0.146259	-0.164689	-0.278228	0.0468738	-0.202781	0.0303712	-0.0647134	-0.349306	-0.0617495	-0.230565	-0.196517	0.0734437	0.111764	0.285236	0.0757736	0.0358592	-0.139042	0.112689	0.275848	0.00586049	0.0201516	0.192069	0.0229108	0.0662646	-0.0764397	0.16912	0.172296	0.24221
ILMN_1723156	NM_002836	protein tyrosine phosphatase, receptor type, A (PTPRA), transcript variant 1, mRNA.	PTPRA	0.00656704	-1.15356	0.141258		0.064848	-0.188229	-0.0726916	0.0191492	-0.36702	-0.273915	-0.0881979	-0.101186	0.0212787	-0.0637738	-0.235633	-0.243001	-0.134619	0.0328266	-0.119474	0.0268198	0.18959	0.157017	-0.507986	0.0693571	0.205035	0.152256	0.377786	0.332084	0.179023	-0.298479	0.178734	0.1056	0.443098	0.0166358	0.0170589
ILMN_1728626	NM_017588	WD repeat domain 5 (WDR5), transcript variant 1, mRNA.	WDR5	0.00467409	-1.15357	0.135711		-0.3068	-0.125697	0.0263435	0.0453031	0.000532622	-0.045447	-0.472943	0.204089	-0.204453	-0.140125	-0.463603	-0.242195	-0.119094	0.236487	0.0625462	0.240617	0.0633365	0.0355245	-0.0550853	0.0626368	0.0663568	-0.167531	0.222682	0.123865	0.152936	-0.262499	0.183251	0.212431	0.0425112	0.429463	0.138726
ILMN_2357386	NM_006731	fukutin (FKTN), transcript variant 2, mRNA.	FKTN	0.000986798	-1.15358	0.100197		0.285417	-0.139453	0.0103984	0.139631	-0.171874	-0.264068	-0.267206	0.0514592	-0.147076	-0.0480782	-0.349339	-0.171874	-0.344316	-0.161416	0.0718153	0.139631	0.0514592	0.198087	-0.156651	0.0309361	0.14152	0.182255	-0.0224557	0.0466871	0.347871	-0.161416	0.17038	0.160762	0.0941523	0.232792	0.0601923
ILMN_2413251	NM_013986	Ewing sarcoma breakpoint region 1 (EWSR1), transcript variant EWS-b, mRNA.	EWSR1	0.00380685	-1.15373	0.131475		0.00143588	-0.0568874	0.00849513	0.0683584	-0.227397	-0.0838958	-0.0751265	0.0370402	-0.382221	-0.133885	-0.453639	-0.0796	-0.264932	-0.148203	-0.214789	-0.310102	0.246607	0.216038	0.152163	0.118235	-0.0300502	0.140359	-0.0295535	0.355244	0.382647	-0.146907	0.135921	-0.180569	0.242357	0.0839182	0.171576
ILMN_2404407	NM_000663	4-aminobutyrate aminotransferase (ABAT), nuclear gene encoding mitochondrial protein, transcript variant 2, mRNA.	ABAT	0.00709165	-1.15441	0.14434		0.242892	-0.183658	-0.473913	-0.0340987	0.195251	-0.186516	-0.0924263	0.0988672	-0.0603874	-0.156437	-0.196068	-0.403659	-0.237402	0.0609223	0.225761	0.069637	-0.000861733	0.193262	0.0959371	-0.10303	0.0953013	-0.0127238	0.00952068	-0.204816	0.074553	-0.081587	0.211725	-0.0120434	0.273785	0.578023	0.376914
ILMN_1743582	NM_032344	nudix (nucleoside diphosphate linked moiety X)-type motif 22 (NUDT22), mRNA.	NUDT22	0.00534855	-1.15464	0.13802		-0.0496152	-0.140191	0.0159516	-0.000501116	-0.296808	-0.192196	-0.40622	-0.0376454	0.0829673	-0.0016544	-0.26539	-0.343445	-0.293472	0.242857	-0.0804402	-0.282931	0.234554	-0.0614088	-0.18051	0.0248857	0.163229	-0.0538143	0.211724	0.242178	0.516784	0.0147343	0.135613	0.0425896	0.11289	0.333341	0.106619
ILMN_1694323	NM_001003722	GLE1 RNA export mediator homolog (yeast) (GLE1), transcript variant 1, mRNA.	GLE1	0.00372055	-1.15494	0.131471		0.0101321	-0.038523	-0.166627	-0.0243265	0.0706517	-0.292908	-0.192032	0.118825	-0.0993327	-0.489172	-0.289863	-0.375245	-0.0955198	0.187085	0.0169098	-0.0674968	0.0348203	0.223078	-0.146473	-0.0698788	0.0623551	-0.281618	0.21641	0.281204	0.24136	-0.09479	0.262227	0.30306	0.156282	0.1615	0.197795
ILMN_1683146	NM_002032	ferritin, heavy polypeptide 1 (FTH1), mRNA.	FTH1	0.00238369	-1.15519	0.119443		-0.00879535	0.0699922	-0.435441	-0.230505	0.0314159	-0.195229	-0.0097107	-0.128071	-0.155141	-0.269649	-0.0832712	0.0911504	-0.0102602	-0.239578	-0.0394464	0.122003	0.0827751	0.207784	0.300964	0.227301	0.247157	0.0827751	0.0249092	-0.150586	-0.0929666	0.541439	-0.215794	-0.0106703	0.0263558	-0.0106703	0.28473
ILMN_1736628	NM_152288	ORAI calcium release-activated calcium modulator 3 (ORAI3), mRNA.	ORAI3	0.000104482	-1.15548	0.0448977		-0.0449653	-0.172409	-0.168023	0.00332993	-0.10875	-0.0711334	-0.188133	0.151223	-0.0661721	-0.334728	-0.145732	-0.286582	-0.214052	0.101185	0.0924056	0.0398026	0.0357735	0.029229	-0.0880794	0.000995479	0.251372	0.0109148	0.220935	0.0734597	0.230867	0.183118	0.0246621	-0.0325811	0.381121	0.174748	0.0396602
ILMN_1761083	NM_194247	heterogeneous nuclear ribonucleoprotein A3 (HNRNPA3), mRNA.	HNRNPA3	0.00386724	-1.15563	0.131475		-0.0193323	-0.129205	-0.234219	0.230529	-0.150192	-0.051198	-0.165298	-0.11614	-0.151557	-0.352051	-0.438424	-0.251138	-0.101969	0.275737	-0.0296455	0.0122338	0.363038	-0.163991	-0.169603	-0.0696978	-0.0206807	0.00818935	0.290784	0.177476	0.297172	0.190184	0.0812874	0.116641	0.367501	0.193798	-0.106173
ILMN_1665049	NM_025137	spastic paraplegia 11 (autosomal recessive) (SPG11), transcript variant 1, mRNA.	SPG11	0.00824858	-1.15563	0.149977		0.154423	0.0592271	-0.0529721	0.180192	0.181517	0.0677486	-0.281949	-0.171117	-0.561309	-0.29876	-0.121409	-0.572382	-0.091286	-0.10983	0.0896687	0.061668	0.0335134	0.142455	0.348152	-0.124023	-0.0238467	-0.108488	0.0664226	0.40222	0.248713	-0.192154	0.111692	0.0210643	0.0965565	0.130959	0.278404
ILMN_2333440	NM_001014842	transmembrane 9 superfamily member 1 (TM9SF1), transcript variant 2, mRNA.	TM9SF1	0.00101595	-1.1558	0.100197		-0.0515635	-0.194002	-0.303117	-0.0740953	-0.0234697	0.0111212	-0.218614	-0.119478	-0.125121	-0.161927	-0.193339	-0.311679	-0.101405	0.271135	-0.0439786	-0.110853	0.0363234	0.123831	-0.126196	-0.130908	0.0442197	-0.0662758	0.19029	0.163369	0.394347	-0.0423196	0.273051	0.270906	0.252364	0.306447	0.0790997
ILMN_2122176	NM_032338	chromosome 12 open reading frame 31 (C12orf31), mRNA.	C12orf31	0.000724012	-1.15686	0.0932123		0.0502493	-0.189906	-0.324412	-0.154142	0.126474	-0.123562	-0.355173	-0.0251089	-0.154162	-0.0501004	0.161241	-0.358378	-0.127637	-0.0664109	0.112484	-0.108298	0.173833	-0.0102068	-0.161414	0.351073	0.057175	-0.117792	0.193902	0.13136	0.057175	0.303605	0.21767	0.0262128	0.0124429	0.193902	0.208468
ILMN_3239130	NM_001077665	ArfGAP with GTPase domain, ankyrin repeat and PH domain 6 (AGAP6), mRNA.	AGAP6	0.00715694	-1.1571	0.144562		0.00389986	-0.223022	-0.360796	0.156652	-0.0432564	-0.0313446	-0.14652	-0.102336	-0.124002	-0.217722	-0.177454	-0.244032	-0.238915	0.172656	-0.155773	0.0726344	-0.0043458	0.0360162	0.188151	-0.276191	0.101123	-0.0444436	-0.00778467	0.652041	0.193907	-0.128479	-0.0146666	0.129705	0.530556	0.317287	0.0750931
ILMN_1778796	NM_001126	adenylosuccinate synthase (ADSS), mRNA.	ADSS	0.00371321	-1.15759	0.131471		0.0216469	0.00621723	0.0333064	-0.078196	0.242707	0.112535	-0.250237	-0.219736	-0.149859	-0.668135	-0.145682	-0.298353	-0.0772005	-0.112066	0.0319704	0.233048	-0.174426	0.0730412	0.0902467	0.101674	-0.0087167	-0.271192	0.134525	0.278582	0.0973077	0.251824	0.285731	0.143235	0.23724	-0.0359931	0.198681
ILMN_1721136	NM_004285	hexose-6-phosphate dehydrogenase (glucose 1-dehydrogenase) (H6PD), mRNA.	H6PD	0.00754507	-1.15778	0.146724		-0.0612718	-0.183458	-0.0514548	0.0893797	0.00609755	-0.17551	-0.317802	-0.0368753	-0.0282188	-0.599981	-0.268604	-0.0434793	-0.107352	0.180104	0.0727659	-0.029041	0.162139	0.109505	-0.232679	-0.139436	0.31431	0.161315	0.196925	0.120053	0.333719	-0.372429	0.0287008	0.1982	-0.0453894	0.412455	0.360999
ILMN_1719158	NM_001012614	C-terminal binding protein 1 (CTBP1), transcript variant 2, mRNA.	CTBP1	0.00588371	-1.15789	0.13879		0.144891	-0.0211287	0.264522	-0.0475658	-0.142323	0.0203491	-0.308586	0.0632357	-0.278365	-0.41283	-0.618281	-0.119125	-0.159354	-0.128087	0.0537412	0.132591	0.308707	0.0632357	0.024877	0.0674384	0.293327	-0.134542	0.168379	0.26653	0.327097	-0.263302	0.0289139	0.0335405	0.0431328	0.209031	-0.143256
ILMN_2383455	NM_001032386	sulfite oxidase (SUOX), nuclear gene encoding mitochondrial protein, transcript variant 2, mRNA.	SUOX	0.00058021	-1.15819	0.0848223		0.0254334	-0.132485	-0.239946	0.0384776	-0.139524	-0.0999346	-0.00653912	-0.0282452	-0.0577098	-0.23804	-0.286566	-0.386914	-0.179933	0.0803745	0.0621008	-0.00906406	0.141302	0.203846	-0.21646	0.12902	0.249626	-0.221034	0.358823	0.254395	0.0582268	0.212359	0.148637	-0.153974	0.113672	0.148424	0.116423
ILMN_1798528	NM_177528	sulfotransferase family, cytosolic, 1A, phenol-preferring, member 2 (SULT1A2), transcript variant 2, mRNA.	SULT1A2	0.00178238	-1.15857	0.116861		-0.0546403	0.0685478	-0.15065	-0.115997	-0.0986562	-0.244219	-0.118843	-0.0765436	-0.0994966	-0.35723	-0.20893	-0.319559	-0.174659	0.343795	0.0783366	-0.138854	0.238356	0.296945	-0.0661153	0.0543863	0.378058	0.11259	0.0183351	-0.168456	0.128925	0.158622	-0.0977147	0.0926083	0.378208	-0.0535714	0.247706
ILMN_1785060	NM_030927	tetraspanin 14 (TSPAN14), mRNA.	TSPAN14	2.17349e-05	-1.15985	0.0385269		-0.0391706	-0.121942	-0.0794983	-0.11884	-0.107716	-0.0618685	-0.210979	-0.0367226	-0.0779849	-0.217545	-0.385888	-0.15958	-0.0851846	-0.131356	-0.00579168	0.00587696	0.175627	-0.0285313	0.0636404	-0.088177	0.131864	0.153105	0.212117	0.18374	-0.285705	0.234972	0.244782	0.1344	0.127593	0.0761572	0.0740538
ILMN_1656016	NM_001357	DEAH (Asp-Glu-Ala-His) box polypeptide 9 (DHX9), mRNA.	DHX9	0.00283397	-1.16009	0.124909		-0.199084	0.045879	-0.435506	-0.0143786	0.0672712	-0.102147	-0.141724	-0.128201	-0.363261	-0.283233	-0.170455	-0.109009	-0.0647222	0.256414	-0.0877452	-0.0611944	-0.0265614	0.0596314	-0.0433952	-0.175798	0.113138	-0.190426	0.216169	0.489489	0.16708	0.0237471	0.12116	0.291406	0.276386	0.290808	0.184008
ILMN_2130411	NM_006801	KDEL (Lys-Asp-Glu-Leu) endoplasmic reticulum protein retention receptor 1 (KDELR1), mRNA.	KDELR1	0.000323453	-1.16031	0.072806		-0.111396	0.0733522	-0.257963	0.0729196	-0.231766	-0.0150968	0.156907	-0.488246	-0.0272474	-0.10164	-0.340957	-0.082656	-0.303393	-0.152673	-0.0616534	0.0943017	0.219741	0.0784231	-0.024235	0.183652	0.212907	0.208092	0.0765663	-0.0116183	0.160076	0.110023	0.0342535	-0.192765	0.138771	0.135827	0.0865643
ILMN_1767006	NM_148919	proteasome (prosome, macropain) subunit, beta type, 8 (large multifunctional peptidase 7) (PSMB8), transcript variant 2, mRNA.	PSMB8	0.00393414	-1.1606	0.131475		-0.291056	-0.165459	0.0469976	0.0731888	-0.0841276	-0.457472	-0.271555	-0.209026	0.194157	-0.240006	-0.0840173	-0.105991	-0.29059	0.0453964	-0.0709678	-0.101813	0.150185	-0.00115674	-0.233526	-0.41097	0.190564	0.13394	0.263959	0.387456	0.035393	0.217462	0.224423	0.192429	0.254788	0.094936	0.0919185
ILMN_1747347	NM_001085423	chromosome 17 open reading frame 60 (C17orf60), mRNA.	C17orf60	0.00636987	-1.16076	0.14097		0.0677685	-0.379462	-0.283285	-0.24429	0.0530628	-0.507174	0.000734434	-0.156725	-0.297341	-0.096739	0.223363	-0.0582826	-0.0543504	0.0531347	-0.0594811	-0.0402939	-0.0627873	0.226384	-0.233031	-0.196685	0.234007	0.0796974	0.237255	-0.0565704	0.0825484	0.141929	0.266177	0.434677	0.126141	-0.0500264	0.486816
ILMN_1681283	NM_001530	hypoxia-inducible factor 1, alpha subunit (basic helix-loop-helix transcription factor) (HIF1A), transcript variant 1, mRNA.	HIF1A	0.00688782	-1.16092	0.142262		-0.126969	-0.0568142	-0.226541	-0.303856	0.178989	-0.0933521	-0.275302	-0.157626	-0.27381	-0.384074	0.174262	-0.374089	0.27636	0.066189	0.080232	0.0536472	-0.299674	-0.0667267	0.390755	-0.105815	0.0236803	0.0313258	-0.074933	0.407782	0.138523	0.44821	0.126417	0.180616	0.0446742	0.0855317	0.280758
ILMN_2052383	NM_015361	R3H domain containing 1 (R3HDM1), mRNA.	R3HDM1	0.00235683	-1.16129	0.118516		-0.306492	0.0327558	-0.254081	-0.168608	-0.0572293	-0.043707	0.427439	-0.12428	-0.215884	-0.343783	-0.127156	-0.14256	0.014095	-0.311896	0.10955	0.370757	-0.00555765	0.0771549	-0.0932785	0.233864	0.216348	0.186406	0.0131011	0.00668338	0.180752	-0.246295	0.150207	-0.0481496	-0.0324523	0.368306	0.211161
ILMN_1677138	NM_001097615	polymerase (RNA) II (DNA directed) polypeptide J3 (POLR2J3), mRNA.	POLR2J3	0.00394037	-1.16185	0.131475		0.237652	-0.160044	-0.0288852	-0.029262	0.0204557	-0.635006	0.000185362	-0.0810596	0.0806492	-0.0252162	-0.149996	-0.312291	-0.396805	-0.183353	0.14104	0.288373	0.188023	-0.0507503	-0.0430484	-0.175876	0.027731	0.186229	0.411566	0.197475	0.0245462	0.371493	-0.071326	-0.13542	0.116701	0.0986528	0.0844421
ILMN_1691188	NM_016290	ubiquitin interaction motif containing 1 (UIMC1), mRNA.	UIMC1	0.00578229	-1.16191	0.13879		0.053409	-0.327651	-0.3073	0.0139329	-0.0207517	0.169435	-0.23536	-0.025059	0.0990555	-0.493321	-0.482274	-0.1334	-0.0226326	0.187627	-0.123498	-0.0820618	0.0746498	0.66173	0.150255	0.0929389	0.132394	0.0532413	0.10188	0.0414941	0.108957	0.138925	0.179783	-0.0161086	0.179783	-0.125405	0.260576
ILMN_2061419	NR_001561	cytochrome c, somatic-like 1 (CYCSL1) on chromosome 6.	CYCSL1	0.00831043	-1.16204	0.149977		0.183681	-0.010386	-0.115405	-0.0422944	0.0203356	-0.242599	-0.21248	-0.133841	-0.177991	0.245415	-0.355733	-0.40013	-0.391739	-0.0248913	0.101984	-0.250432	0.0341193	0.119315	-0.0802154	-0.163837	0.042282	0.103643	0.219591	-0.103318	0.551557	-0.214778	0.147251	0.330601	0.0975601	0.316657	0.417782
ILMN_3205603	XM_001722169	PREDICTED: hypothetical LOC388572 (LOC388572), mRNA.	LOC388572	0.00299211	-1.16297	0.124909		0.0246904	-0.127118	-0.223744	-0.0125884	0.267691	-0.437889	-0.0616739	-0.138404	0.025048	-0.29035	-0.228269	-0.257944	-0.221805	0.0985667	0.165846	0.165372	0.139261	0.28291	-0.201479	-0.216304	-0.0128493	0.134057	0.365926	0.198867	0.0102252	-0.281174	0.261956	0.0564056	0.218081	0.281543	0.210971
ILMN_1721575	NM_020857	vacuolar protein sorting 18 homolog (S. cerevisiae) (VPS18), mRNA.	VPS18	0.00779821	-1.16404	0.147762		0.0211677	-0.419958	-0.141806	0.149626	-0.170949	-0.160138	-0.0157527	-0.126025	-0.0618283	-0.55825	-0.565164	0.0853586	0.0965088	0.208196	-0.169719	-0.154477	0.24787	0.203385	0.0550763	-0.149969	0.0152166	0.324285	0.193776	0.264051	0.156915	0.0451407	-0.166016	0.0103009	0.312152	0.331657	0.191247
ILMN_1766200	NM_015916	calcium homeostasis modulator 2 (CALHM2), mRNA.	CALHM2	0.00276652	-1.16435	0.124734		-0.273485	-0.139982	-0.00855379	-0.0787771	-0.109565	-0.277425	-0.198525	-0.275169	-0.0723335	-0.09729	0.18532	-0.010843	-0.339053	-0.0514234	-0.218451	-0.0988838	0.4319	0.012378	0.0341474	0.100355	0.220653	-0.117571	0.450054	0.434289	-0.0720312	0.134597	0.188515	0.0468642	0.25772	-0.249594	0.0555338
ILMN_2288483	NM_032898	chromosome 3 open reading frame 34 (C3orf34), mRNA.	C3orf34	0.00302248	-1.16448	0.124909		0.338813	-0.118295	-0.0762084	-0.0202194	0.0776467	-0.307213	-0.237035	-0.242761	-0.0172623	-0.271588	-0.380096	-0.334467	-0.136662	0.101983	0.0585285	0.228271	0.0196851	0.0585285	-0.0202194	-0.372103	0.0412945	0.068688	0.0533224	0.228271	0.342856	-0.0621015	0.0983798	0.315624	0.128607	0.372663	0.203179
ILMN_1719097	NM_013326	chromosome 18 open reading frame 8 (C18orf8), mRNA.	C18orf8	0.00385282	-1.16472	0.131475		-0.0985798	0.140515	0.0166971	0.0289464	-0.308222	0.0776494	-0.201405	-0.0777828	-0.273018	-0.0886208	-0.490358	-0.188608	-0.303535	-0.0363397	-0.0388423	0.110169	-0.00639456	-0.0861071	-0.12398	-0.19134	-0.138178	0.088707	0.131369	0.246251	0.457093	0.462926	0.270303	0.28422	0.246062	-0.0230087	-0.138521
ILMN_1842286	AV735490	AV735490 CB cDNA clone CBFBDD05 5, mRNA sequence	NaN	0.0028011	-1.16626	0.124909		0.100982	-0.0454738	0.00663921	-0.531848	-0.069342	0.229592	-0.163203	0.0312992	-0.119856	-0.422599	-0.00764311	-0.356789	-0.133253	-0.229938	0.0855593	-0.0132229	-0.00964113	0.238304	-0.0393578	0.22373	0.188282	0.220638	-0.185505	-0.0494783	0.175671	0.340804	-0.188049	0.0800437	0.00170776	0.394722	0.229683
ILMN_2157957	NM_005316	general transcription factor IIH, polypeptide 1, 62kDa (GTF2H1), mRNA.	GTF2H1	0.00025176	-1.16635	0.0718438		0.115035	-0.206247	-0.162625	-0.103809	0.110858	-0.0977803	-0.162924	-0.0435254	-0.268829	-0.290248	-0.0921137	-0.186569	-0.0304392	-0.218795	0.00741121	0.39944	-0.137251	0.0286984	0.108864	0.0180231	0.296318	0.0998522	-0.255017	0.0186759	0.20352	0.0278487	0.305139	0.0728931	0.246157	0.132714	0.211734
ILMN_1778457	NM_001562	interleukin 18 (interferon-gamma-inducing factor) (IL18), mRNA.	IL18	0.00105929	-1.16672	0.100197		0.0494508	0.0407177	-0.212573	-0.219997	-0.0471317	-0.368099	-0.000343073	0.15002	0.0407177	-0.162372	-0.487155	-0.0436867	-0.277947	-0.148188	0.130778	0.204724	0.204893	0.204724	-0.0811227	-0.104997	0.0407177	0.197718	0.187346	0.0664543	0.171514	-0.307823	0.00596208	0.372251	0.0359456	0.175034	0.229597
ILMN_1680386	NM_001097590	ribonuclease P/MRP 38kDa subunit (RPP38), transcript variant 3, mRNA.	RPP38	4.57369e-05	-1.16758	0.0419519		-0.0762356	-0.149874	-0.119317	-0.00272495	-0.188786	-0.0984867	-0.102945	-0.0258272	-0.144345	0.0204435	-0.26352	-0.494739	-0.194938	0.154332	-0.0199411	0.0439082	-0.0683519	0.0761818	0.0541162	0.115836	0.0759481	0.332169	0.135463	0.130149	0.169212	0.280278	-0.0308498	0.237726	-0.00990323	0.0931015	0.136316
ILMN_1662026	NM_000061	Bruton agammaglobulinemia tyrosine kinase (BTK), mRNA.	BTK	0.00591149	-1.16786	0.13879		-0.200513	-0.0507832	-0.513858	-0.0392594	-0.268293	0.014516	-0.160413	-0.112858	-0.0299712	-0.147535	-0.000972203	-0.287103	0.031618	0.100472	-0.200513	-0.159189	0.099365	0.182407	-0.104351	0.479368	-0.00913034	-0.094003	0.178426	-0.0605747	0.632006	0.373684	0.132818	0.0830165	-0.00388967	0.376567	-0.122027
ILMN_2104830	NM_001610	acid phosphatase 2, lysosomal (ACP2), mRNA.	ACP2	0.00105429	-1.16796	0.100197		-0.290191	-0.188364	0.128667	-0.221725	-0.265582	-0.0385353	-0.0933446	-0.0831227	0.100559	-0.146703	-0.508585	-0.147505	-0.176302	0.00510845	-0.170028	0.0658928	0.320725	0.156902	0.0538466	-0.30857	0.148453	-0.0641877	0.214062	0.119896	0.298805	0.128359	0.246901	-0.0531542	0.113823	0.288253	-0.0904283
ILMN_3182069	XM_001732822	PREDICTED: hypothetical protein LOC100129697 (LOC100129697), mRNA.	LOC100129697	0.00746222	-1.16823	0.146391		0.2193	-0.272302	-0.392066	0.0181887	-0.0671042	-0.134805	-0.376016	0.178812	-0.206699	-0.379828	0.105892	-0.372847	-0.266189	0.211667	0.00324701	-0.219982	0.479521	-0.0733099	-0.0921444	0.307903	0.313741	0.0423884	0.213005	0.208061	0.375455	-0.156761	-0.00204678	-0.0392399	0.180898	0.196044	-0.0289062
ILMN_1657423	NM_016630	spastic paraplegia 21 (autosomal recessive, Mast syndrome) (SPG21), transcript variant 1, mRNA. XM_945612 XM_945613 XM_945615 XM_945617 XM_945619 XM_945622	SPG21	0.00747716	-1.16838	0.146391		0.0546105	-0.286742	-0.272195	0.12918	-0.0726374	-0.509431	-0.0584744	-0.059364	-0.151812	-0.613914	-0.220867	-0.16548	0.170734	0.390088	-0.0759161	-0.0830107	0.229991	0.249421	0.00602894	-0.0380941	0.238937	-0.158372	0.286532	0.289578	0.223253	-0.0652223	0.326103	0.292585	0.0410221	-0.0676714	0.0982131
ILMN_1766593	NM_020901	PHD and ring finger domains 1 (PHRF1), mRNA.	PHRF1	0.000837661	-1.16872	0.095484		0.0855297	-0.0160903	-0.121284	-0.276685	-0.0144474	-0.0189039	-0.114107	-0.168745	-0.142649	-0.276519	-0.470578	-0.181571	-0.201684	0.263212	-0.00134659	0.00118772	-0.0970236	-0.0262672	-0.099863	0.116941	0.0992525	0.0203256	0.148206	0.354046	0.401729	0.0170872	0.237061	0.139619	-0.0572256	0.348576	0.212374
ILMN_1880425	AK095358	cDNA FLJ38039 fis, clone CTONG2013934	NaN	0.000824453	-1.16978	0.095484		-0.38009	0.044742	-0.504309	-0.0868418	-0.203096	-0.023396	-0.211102	-0.0303291	-0.0191093	-0.0380979	-0.0920351	-0.242769	-0.142113	0.250977	-0.0938915	0.113324	0.120544	0.279261	-0.0695298	-0.00644391	-0.0456062	0.444768	0.386396	0.0515871	-0.00885135	0.094074	0.0405001	0.184707	0.193706	0.100118	0.0242394
ILMN_1718353	XM_941907	PREDICTED: similar to Transcriptional regulator ATRX (ATP-dependent helicase ATRX) (X-linked helicase II) (X-linked nuclear protein) (XNP) (Znf-HX) (LOC652458), mRNA.	LOC652458	0.000309414	-1.16987	0.072806		-0.113837	-0.234601	-0.120542	0.112646	0.0340752	-0.138216	-0.195792	-0.0847763	-0.170561	-0.30204	-0.260558	-0.355584	0.0182793	0.0388531	0.00578975	-0.185269	-0.185939	0.053069	0.0744856	0.0205078	0.00673816	-0.0810891	0.201769	0.100818	0.206951	0.093883	0.353899	0.270504	0.204716	0.365337	0.189214
ILMN_1677691	XM_940430	PREDICTED: hypothetical protein LOC648852 (LOC648852), mRNA.	LOC648852	0.00685623	-1.16991	0.142262		0.35035	-0.00522552	-0.141874	-0.152082	-0.215821	-0.455187	-0.240208	0.0173974	-0.117082	0.300501	-0.306911	-0.333124	-0.196483	-0.230406	0.0876922	0.106417	-0.0325	0.0990736	-0.0266015	0.0993001	-0.0363629	0.148028	-0.0268711	-0.192331	0.64078	-0.169974	0.072869	0.240462	0.19339	0.0887089	0.460678
ILMN_1696004	NM_024652	leucine-rich repeat kinase 1 (LRRK1), mRNA.	LRRK1	0.000234656	-1.17078	0.0718438		-0.0338761	-0.169466	-0.172639	-0.0696264	-0.186901	0.0631657	-0.174455	0.326722	-0.379831	-0.197362	-0.174455	-0.154892	-0.0997251	-0.111448	0.0717955	-0.0128144	0.063061	0.217188	-0.144349	0.130054	0.0588539	0.0315854	0.258349	-0.0495278	0.425449	0.27332	0.149386	-0.0395323	0.158963	0.224967	0.186645
ILMN_1804530	XM_936251	PREDICTED: similar to Actin-related protein 2/3 complex subunit 1B (ARP2/3 complex 41 kDa subunit) (p41-ARC) (LOC653888), mRNA.	LOC653888	0.00780455	-1.17156	0.147762		0.16805	0.217062	-0.20753	-0.0894855	-0.113083	-0.615537	-0.172756	-0.275743	-0.0263968	-0.372418	-0.549982	0.0154066	-0.22599	0.490249	-0.118748	-0.0743356	0.188319	0.239335	-0.169916	-0.0533713	0.279945	0.0814768	0.211776	0.199124	0.199836	0.201625	0.129322	0.13211	0.0800533	0.0579721	0.16381
ILMN_1691291	NM_033198	phosphatidylinositol glycan anchor biosynthesis, class S (PIGS), mRNA.	PIGS	0.00390345	-1.17156	0.131475		-0.349517	-0.131401	-0.180394	-0.0799122	-0.195267	0.0886338	-0.0253712	-0.0250207	0.0475332	-0.159204	-0.620505	-0.0222109	-0.288491	0.199962	-0.250233	-0.298763	0.115716	0.11066	-0.161396	-0.00957819	0.171898	0.11807	0.46275	0.0956672	0.190827	0.204532	0.256186	0.265515	0.232123	0.284331	-0.0191959
ILMN_2407529	NM_197939	ring finger protein 135 (RNF135), transcript variant 2, mRNA.	RNF135	1.31623e-05	-1.17166	0.0313816		-0.166123	-0.23461	-0.191651	-0.186743	-0.066254	-0.17429	-0.136748	0.14054	0.142877	-0.166658	-0.16887	-0.295568	-0.0927629	-0.0789838	-0.0116003	0.0303095	0.0889319	0.166369	0.0671031	0.0964663	0.375409	0.22974	0.155224	-0.114018	0.11057	0.161899	-0.0982185	0.124548	0.188657	0.123989	0.155052
ILMN_1700855	XM_926137	PREDICTED: similar to Maltase-glucoamylase, intestinal (LOC642684), mRNA.	LOC642684	0.00230258	-1.17185	0.118516		0.182788	-0.303465	-0.444528	0.109841	0.0225909	-0.155495	-0.174871	-0.0611458	-0.227738	-0.477149	-0.160557	-0.229166	0.214262	0.108302	0.128902	0.0683198	0.0563111	0.419472	-0.0832734	-0.0244671	-0.0998808	-0.00227149	0.0888951	0.319128	0.194988	-0.0972033	0.257331	0.156264	0.340644	-0.012436	0.240266
ILMN_1813801	XR_016986	PREDICTED: similar to peptidase (prosome, macropain) 26S subunit, ATPase 1 (LOC643668), mRNA.	LOC643668	0.000803934	-1.17208	0.095484		-0.0712651	0.0693654	-0.178668	-0.0687823	-0.0241042	-0.249022	-0.236362	0.150995	0.128431	-0.215021	-0.35008	-0.233348	-0.230292	-0.190367	0.161712	0.0581777	0.105453	0.164809	-0.169378	-0.0620922	0.179406	0.125756	-0.111916	0.43322	0.290379	-0.231218	0.255901	0.189475	0.360947	0.0437495	0.0373338
ILMN_1655987	NM_015136	stabilin 1 (STAB1), mRNA.	STAB1	0.00204265	-1.17242	0.118502		-0.213159	-0.104114	-0.258253	-0.395145	-0.0481338	0.0130428	-0.33803	0.0371212	-0.0243074	-0.267379	0.118553	-0.333162	-0.0686098	0.260011	-0.100456	-0.0667505	0.214016	0.124406	-0.208532	0.251483	0.530183	0.0381781	0.394517	0.0363767	0.0263441	0.286837	0.0354178	0.0172206	0.148873	0.0226361	0.181557
ILMN_1757439	NM_002896	RNA binding motif protein 4 (RBM4), mRNA.	RBM4	0.00650053	-1.17253	0.1411		-0.124135	-0.12994	-0.372375	-0.235808	-0.0120458	0.0276503	-0.210843	0.237737	-0.249702	-0.602855	-0.301013	-0.273283	0.0459876	0.425573	0.0107958	-0.0339503	0.0276503	0.223584	-0.118709	-0.23779	0.0487016	0.0720994	0.275575	0.260443	0.353346	-0.0380725	0.255474	0.217109	-0.1024	0.290278	0.243978
ILMN_2118472	NM_032333	chromosome 10 open reading frame 58 (C10orf58), mRNA.	C10orf58	0.000958058	-1.17334	0.0998963		0.305921	-0.0516517	-0.0397028	-0.184612	-0.227583	-0.408666	-0.372895	-0.00928649	-0.121242	0.0487879	-0.0397028	-0.184612	-0.348709	-0.0772022	-0.106497	0.0812297	0.126259	0.221264	-0.0516517	-0.124896	0.111395	0.274678	0.16528	0.398847	0.0724442	-0.213013	0.189673	0.172564	0.221264	0.271178	0.0327163
ILMN_1659257	NM_152942	tumor necrosis factor receptor superfamily, member 8 (TNFRSF8), transcript variant 2, mRNA.	TNFRSF8	0.00752547	-1.17358	0.146588		0.133111	-0.116754	-0.454348	-0.282367	-0.266898	-0.252771	0.00613579	-0.276867	-0.0565424	-0.219024	-0.452816	0.0776286	0.190229	0.164082	0.0501619	-0.16748	0.0230271	-0.0198343	-0.555231	0.245693	0.314344	0.181877	0.380805	0.123375	0.0572749	0.410495	0.0880507	0.0321367	0.265688	0.104044	0.196662
ILMN_1703718	NM_006429	chaperonin containing TCP1, subunit 7 (eta) (CCT7), transcript variant 1, mRNA.	CCT7	0.00579851	-1.17444	0.13879		-0.246398	-0.133411	0.0680009	-0.122922	-0.167367	0.00212655	0.097712	-0.0508969	-0.0845668	-0.0683691	-1.04991	0.0695486	-0.146255	-0.0533039	0.0180115	0.0475036	-0.0606272	-0.0471341	-0.152783	0.117717	0.0570945	0.0583186	0.130215	0.0735575	0.414803	0.12781	0.25599	0.113496	-0.000286011	0.34255	0.157126
ILMN_1708485	NM_018688	bridging integrator 3 (BIN3), mRNA.	BIN3	0.00484288	-1.17477	0.135711		0.379349	0.177965	0.0145432	-0.057409	0.108383	-0.106983	-0.505233	-0.273431	-0.419812	-0.230883	-0.387443	-0.44662	0.0218278	-0.0390316	-0.00808467	0.140626	0.076469	0.103735	0.0205402	0.143924	0.251618	-0.289704	0.016076	0.0107293	0.190835	0.104672	0.121325	0.403698	0.373515	-0.00464076	0.152111
ILMN_1804174	XM_938851	PREDICTED: Fc fragment of IgG, low affinity IIb, receptor (CD32) (FCGR2B), mRNA.	FCGR2B	0.00410679	-1.17483	0.13262		0.0252405	-0.186702	-0.206923	0.361283	-0.177089	-0.111597	-0.313079	-0.0727437	-0.171951	-0.194263	-0.313845	-0.215504	0.144633	-0.232635	-0.293926	0.120847	-0.173813	0.277345	0.273377	0.514377	-0.00453126	-0.00144505	-0.083111	0.0600303	0.490873	0.195686	0.0685685	-0.130731	0.15315	0.33899	0.12402
ILMN_1684440	NM_002859	paxillin (PXN), mRNA.	PXN	0.00249816	-1.17542	0.122157		0.336877	-0.0184834	-0.30424	-0.137722	-0.0144201	0.221428	-0.14128	-0.0906078	-0.121582	-0.39379	-0.632741	0.0171121	-0.196231	-0.147161	-0.0668154	0.110637	0.140164	0.211287	0.108242	-0.221647	0.181446	0.275036	0.310921	0.1103	-0.110316	0.182874	0.178802	0.0602904	0.271391	-0.0286081	0.279427
ILMN_3301372	XM_001726158	PREDICTED: similar to protein tyrosine phosphatase 4a1, transcript variant 1 (LOC730167), mRNA.	LOC730167	0.00338553	-1.17557	0.12743		-0.0175641	-0.181254	-0.214834	-0.0614179	0.183852	-0.0603287	-0.260335	-0.129613	-0.0777011	-0.527976	-0.213578	-0.444784	0.186531	0.064559	0.00508379	-0.0366729	-0.0846121	0.10104	0.17823	-0.173627	-0.0581796	-0.0811525	-0.00694127	0.0728618	0.0382597	0.621303	0.28908	0.140032	0.359109	0.171426	0.301562
ILMN_1768181	NM_022371	torsin family 3, member A (TOR3A), mRNA.	TOR3A	0.00561321	-1.17569	0.13879		-0.281608	-0.276383	0.115504	0.0851696	-0.0329034	-0.130982	-0.250782	-0.2365	-0.114407	-0.375196	0.0798945	-0.308123	-0.170388	0.00410836	-0.0813586	-0.20274	-0.0572403	-0.0204832	-0.282351	0.129822	0.0426713	-0.201097	0.47585	-0.0698481	0.563748	0.0269972	0.245986	0.153875	0.507306	0.233614	0.206817
ILMN_1776347	NM_030752	t-complex 1 (TCP1), transcript variant 1, mRNA.	TCP1	0.00506146	-1.17599	0.135711		0.195677	0.323383	-0.130053	-0.0603997	0.045513	0.0734952	-0.106297	0.152164	-0.387157	-0.37533	-0.466973	-0.255578	-0.289928	-0.431204	0.096181	0.190322	-0.0217102	-0.128153	-0.0320524	0.141132	0.0126384	-0.161091	0.026519	0.117678	0.344045	0.0929078	0.389986	0.113072	0.236185	0.472852	0.00571306
ILMN_2279635	NM_001418	eukaryotic translation initiation factor 4 gamma, 2 (EIF4G2), transcript variant 1, mRNA.	EIF4G2	0.0058818	-1.17613	0.13879		-0.203861	-0.1972	-0.128807	0.141609	0.174306	-0.231703	-0.46085	-0.113828	-0.0742858	-0.73616	-0.0881167	-0.11147	0.0246774	0.198216	0.0873313	0.13621	-0.180507	-0.0759048	0.00481507	0.0226218	0.0246774	-0.157933	-0.0730409	0.325443	0.147115	0.45132	0.425818	0.0908394	0.305625	0.236906	0.0127639
ILMN_1772845	NM_180699	small nuclear ribonucleoprotein 35kDa (U11/U12) (SNRNP35), transcript variant 3, mRNA.	SNRNP35	0.00144882	-1.17625	0.112053		-0.0302618	-0.271637	-0.12686	-0.119618	-0.210072	0.123783	-0.13599	0.0158189	0.0108902	-0.0893719	-0.577025	0.0701651	-0.377869	-0.0668337	-0.167596	-0.0872432	-0.0257107	0.0523358	-0.0719832	0.290601	0.0916716	0.0602603	0.282817	0.0481894	0.495694	0.0853491	-0.0167036	0.201928	-0.0699253	0.343857	0.30042
ILMN_1693421	NM_002951	ribophorin II (RPN2), mRNA.	RPN2	0.00191842	-1.17641	0.116861		-0.0844567	-0.0426673	-0.21244	-0.242713	0.0321266	-0.238722	-0.0286923	0.147285	-0.0779767	-0.076431	-0.570986	-0.359958	-0.233367	0.135107	-0.222498	0.0656355	-0.0308857	0.284014	-0.234794	0.124912	0.0502634	0.230064	0.197693	-0.0859322	0.230644	0.073608	0.126187	0.150948	-0.0331937	0.344058	0.462857
ILMN_2392080	NM_001017977	DDB1 and CUL4 associated factor 6 (DCAF6), transcript variant 2, mRNA.	DCAF6	0.00622881	-1.17651	0.140468		0.21186	0.124549	-0.0559973	-0.0288845	0.0867529	-0.0920526	-0.266809	0.0136946	-0.146414	-0.258878	-0.276597	-0.379797	-0.316941	-0.325585	0.236653	0.456051	-0.0982194	-0.243305	-0.131779	-0.0502043	0.0391278	0.339405	0.0445627	0.127258	-0.287999	0.464435	0.172262	0.369269	0.458701	0.020172	-0.00746401
ILMN_1795474	XR_018325	PREDICTED: similar to chaperonin containing TCP1, subunit 8 (theta) (LOC644131), mRNA.	LOC644131	0.00182938	-1.17733	0.116861		0.23143	0.200697	-0.0634458	-0.138201	0.138292	0.0624198	-0.372771	-0.229588	-0.338722	-0.362036	-0.234046	-0.15811	-0.298691	-0.240998	0.17719	0.317777	-0.0908442	-0.107831	0.12254	0.251378	-0.0468906	0.245699	0.0502204	0.181742	0.0341075	0.128412	0.0705139	0.0757543	-0.1377	-0.00155202	0.543097
ILMN_1773505	NM_003363	ubiquitin specific peptidase 4 (proto-oncogene) (USP4), transcript variant 1, mRNA.	USP4	0.0015246	-1.17771	0.114999		-0.0860387	-0.184411	-0.410969	0.172526	0.270696	-0.411009	-0.143412	-0.200515	-0.18345	-0.0147828	-0.415863	-0.368126	0.0565986	0.19204	0.0323713	0.10207	0.151561	0.0138833	0.0776216	-0.121159	-0.0249319	-0.0113979	0.35301	0.212882	0.0254553	0.292367	0.230639	-0.0581698	0.166148	0.17567	0.296962
ILMN_2377980	NM_002708	protein phosphatase 1, catalytic subunit, alpha isoform (PPP1CA), transcript variant 1, mRNA.	PPP1CA	0.00225694	-1.17804	0.118516		0.238908	-0.156406	0.0140093	-0.0813053	-0.0974916	-0.140908	-0.300956	-0.19003	-0.0960508	-0.506612	-0.470501	-0.154006	-0.108397	0.234237	-0.0514518	-0.232421	0.483898	0.186521	-0.0590663	0.0897238	0.237946	0.261387	0.286752	0.315994	0.106799	0.079866	0.176015	0.0545761	-0.0184327	-0.136196	0.0321955
ILMN_2367215	NM_005040	prolylcarboxypeptidase (angiotensinase C) (PRCP), transcript variant 1, mRNA.	PRCP	0.00107399	-1.17841	0.100197		0.298547	-0.508801	-0.471541	-0.152369	0.330071	0.00696118	-0.255596	-0.0968334	-0.06278	-0.242649	-0.322652	-0.272178	0.0681795	-0.0207328	0.105317	0.159205	0.0258185	0.216483	-0.0272301	0.00362017	0.211624	0.238911	0.0553616	0.165896	0.0023574	0.108825	-0.0131613	0.138683	0.194048	0.180459	0.192856
ILMN_1813795	NM_182665	Ras association (RalGDS/AF-6) domain family member 5 (RASSF5), transcript variant 3, mRNA.	RASSF5	0.00294656	-1.17857	0.124909		-0.083757	-0.319664	-0.180431	0.0411124	0.0269515	-0.320786	-0.0132145	-0.151066	0.0259682	-0.418722	-0.166995	-0.573367	-0.0802354	0.375641	-0.11605	0.12088	0.0835792	-0.0156111	0.0287393	-0.206735	-0.0446279	-0.0929794	0.316435	0.412153	0.0588669	0.0573557	0.328898	0.223216	0.277502	0.177033	0.188402
ILMN_1815445	NM_006123	iduronate 2-sulfatase (Hunter syndrome) (IDS), transcript variant 2, mRNA.	IDS	0.0067406	-1.17957	0.14203		0.156088	-0.16391	-0.203591	-0.0523389	-0.0967859	-0.0719103	-0.207981	-0.292972	-0.121307	-0.781149	-0.0612992	0.05465	0.0913329	0.124032	-0.0230727	0.0402405	0.196115	0.562581	0.36732	-0.14866	0.0270583	0.245933	0.0531876	0.0310581	0.114098	0.273667	0.223751	-0.227738	0.314944	-0.274099	0.298194
ILMN_2089977	NM_182827	FK506 binding protein 9-like (FKBP9L), mRNA.	FKBP9L	0.00642687	-1.1799	0.1411		-0.18126	-0.331565	-0.35278	0.140981	0.108806	0.377439	-0.0464771	-0.506234	0.0192603	-0.541932	-0.193367	-0.0999837	-0.0767011	-0.0725882	0.0759012	-0.11068	0.196559	0.359443	-0.0885367	-0.174971	0.278273	0.11062	0.21326	-0.0148945	-0.103439	0.195389	0.0166719	0.215843	0.625594	0.047898	0.0816225
ILMN_3199780	XR_038201	PREDICTED: misc_RNA (LOC401076), miscRNA.	LOC401076	0.00164515	-1.17998	0.115688		0.287299	-0.0611047	-0.392089	-0.443136	0.0914051	-0.549064	-0.337009	0.105704	0.0981605	-0.135891	-0.0700826	-0.180222	-0.15016	-0.0361879	0.138066	-0.0971891	0.27606	0.209936	-0.0271442	0.0202094	0.0426109	0.431004	0.209936	0.0333442	-0.0706568	0.0259564	0.320307	0.0820141	0.124124	0.0758729	0.112343
ILMN_2286014	NM_172097	cation channel, sperm associated 2 (CATSPER2), transcript variant 4, mRNA.	CATSPER2	0.0060023	-1.18014	0.139626		0.241487	-0.00443371	-0.0638211	0.00847996	-0.218158	-0.390374	-0.232296	-0.107449	-0.00443371	0.0764247	-0.483484	-0.368605	-0.298187	-0.075002	0.0501977	-0.0500387	0.038232	0.139156	-0.276578	-0.0994754	0.14951	0.131926	0.0991344	-0.0648022	0.474291	-0.114561	0.15287	0.283524	0.570814	-0.211003	0.457754
ILMN_1671039	NM_004482	UDP-N-acetyl-alpha-D-galactosamine:polypeptide N-acetylgalactosaminyltransferase 3 (GalNAc-T3) (GALNT3), mRNA.	GALNT3	0.000427417	-1.18056	0.0830069		0.21467	0.0498149	-0.266135	0.0932869	-0.00836319	-0.331098	-0.317501	-0.390319	0.104507	-0.0813853	-0.387758	-0.206701	-0.146305	-0.066455	0.101038	0.0610206	0.0600209	0.0782208	-0.0593887	0.00648362	0.135338	0.487284	0.0323851	-0.109329	0.235657	0.121971	0.121971	0.148484	0.276659	0.195148	0.065517
ILMN_3221828	XR_015650	PREDICTED: misc_RNA (LOC728787), miscRNA.	LOC728787	0.00334251	-1.18081	0.126735		0.0397184	-0.196928	0.118488	-0.0393726	-0.190087	-0.424438	-0.0146142	-0.154457	-0.0838547	-0.462381	-0.32107	0.129012	-0.349045	0.113324	-0.252932	-0.0256431	0.136989	0.0756807	-0.295324	0.136221	0.00952662	0.130782	0.260839	0.236707	0.11538	0.586407	0.259491	0.184462	0.3284	0.0771685	-0.116954
ILMN_1766085	NM_002908	v-rel reticuloendotheliosis viral oncogene homolog (avian) (REL), mRNA.	REL	0.000754702	-1.18113	0.0932123		0.165108	-0.00837071	-0.237302	-0.235765	0.115412	-0.146615	-0.369386	0.0639768	-0.325011	-0.136897	-0.0828255	-0.337585	-0.136812	-0.144492	0.187366	0.488881	0.0515714	0.0843098	-0.102357	0.0718718	0.114593	0.0785486	-0.0498018	0.199085	0.421196	-0.200407	0.135143	0.206036	-0.172621	0.0966137	0.266919
ILMN_1772113	NM_001025203	U2 small nuclear RNA auxiliary factor 1 (U2AF1), transcript variant b, mRNA.	U2AF1	0.00809678	-1.18159	0.14926		0.314331	-0.0432717	-0.238413	0.030015	-0.166917	-0.319358	0.0329962	-0.0968501	-0.059465	-0.521535	-0.717601	-0.225445	-0.172823	0.315168	-0.0330937	-0.162021	0.191804	0.074611	0.0429014	-0.309258	-0.0327306	0.0826879	0.450543	0.155646	0.415493	0.0680772	0.185738	0.248529	0.0153546	0.257494	0.170825
ILMN_1742167	NM_032704	tubulin, alpha 1c (TUBA1C), mRNA.	TUBA1C	0.00403772	-1.18241	0.13243		-0.128348	0.139661	-0.245276	0.201737	0.087431	-0.307049	-0.171466	0.0367651	-0.240481	-0.65604	-0.422955	-0.205247	-0.189945	0.226291	-0.0561628	0.218442	0.0977684	0.262184	-0.00216307	0.141171	0.255593	-0.171277	-0.186762	-0.0388679	0.392187	0.185558	0.201737	0.155561	0.0508735	0.415763	-0.0889081
ILMN_3243859	NM_005005	NADH dehydrogenase (ubiquinone) 1 beta subcomplex, 9, 22kDa (NDUFB9), mRNA.	NDUFB9	0.00114745	-1.1836	0.102555		0.0337387	0.261038	0.187085	0.0129313	-0.230949	0.0129313	-0.345713	-0.156743	-0.29642	-0.28994	-0.447653	-0.386905	-0.359178	-0.0723692	-0.0540512	-0.0297642	0.0233901	-0.0061668	0.078501	0.316798	0.291294	0.198781	-0.24009	-0.00866043	0.0451006	0.16221	0.105658	0.321053	0.0182173	0.233597	0.154772
ILMN_3213568	XR_019262	PREDICTED: misc_RNA (LOC402112), miscRNA.	LOC402112	0.00488387	-1.18378	0.135711		-0.307541	-0.0730706	0.185879	-0.147223	-0.00215183	0.0916629	-0.15804	0.0651492	-0.0453603	-0.101234	-0.524077	-0.233701	-0.669842	-0.0546072	-0.0868407	0.0953221	-0.302584	-0.184351	-0.0124847	0.256769	0.0347056	-0.140372	0.151532	0.420769	0.249015	-0.0141062	0.277658	0.154669	0.0783211	0.398826	0.363779
ILMN_2410772	NM_012289	kelch-like ECH-associated protein 1 (KEAP1), transcript variant 2, mRNA.	KEAP1	0.00192012	-1.18381	0.116861		-0.29751	-0.182485	0.277949	0.149593	-0.0107113	-0.232512	-0.136348	0.139068	-0.209785	-0.561964	-0.656624	-0.139919	-0.068482	-0.0472817	-0.0897878	0.0470635	0.391748	0.211072	0.0252135	-0.146857	0.103484	0.168449	0.0104816	0.177262	0.116235	0.11524	-0.0198328	0.0612844	0.238681	0.254475	0.0734788
ILMN_2362293	NM_030793	F-box protein 38 (FBXO38), transcript variant 1, mRNA.	FBXO38	0.00048561	-1.18398	0.0832933		0.193098	-0.0986187	-0.272142	-0.276422	0.158535	0.0826073	-0.415175	-0.228944	-0.0993051	-0.3805	0.0848348	-0.384431	0.0621959	-0.14255	0.26427	0.260786	0.0377157	0.00513485	0.0323086	0.0342639	0.228609	0.153924	0.0775517	-0.0669904	0.151634	0.144592	0.182649	0.0631027	0.0861401	-0.0547163	0.45637
ILMN_1802252	NM_002046	glyceraldehyde-3-phosphate dehydrogenase (GAPDH), mRNA.	GAPDH	0.00822705	-1.18532	0.149955		-0.902135	-0.18224	-0.120541	0.00600239	-0.177477	-0.277014	-0.196213	-0.159157	-0.06426	-0.0798787	-0.220004	0.0880622	-0.0697936	0.472226	-0.39134	-0.0408159	0.140844	0.30708	-0.02101	-0.106804	0.330226	-0.0181019	0.125223	0.187039	0.180096	0.219667	0.118965	0.284794	0.113468	0.407564	0.0469063
ILMN_2388090	NM_139013	mitogen-activated protein kinase 14 (MAPK14), transcript variant 3, mRNA.	MAPK14	0.0008449	-1.18556	0.095484		0.0823964	0.00207891	-0.292336	-0.175747	0.0708343	-0.0474578	-0.115795	-0.217689	-0.28145	-0.485251	-0.356543	-0.201859	-0.0591465	0.224978	0.137126	-0.0145218	-0.0931396	0.22026	-0.306091	-0.0244682	0.173237	0.234163	0.30961	0.18079	0.143234	-0.116123	0.160062	0.31442	0.280436	0.0401103	0.285411
ILMN_1756860	NM_004786	thioredoxin-like 1 (TXNL1), mRNA.	TXNL1	0.00688855	-1.18736	0.142262		0.22838	0.0234058	-0.0455925	-0.114818	-0.128593	0.0243609	-0.209861	0.149586	-0.203582	-0.509458	-0.320558	-0.358816	-0.0685589	-0.246075	0.242211	0.357976	-0.508378	-0.029989	-0.271363	0.0538324	0.0153581	0.0802621	0.112303	-0.0853777	0.290755	0.270271	0.481496	0.310918	0.375943	-0.0463826	0.400405
ILMN_1774427	NM_020898	calcium binding and coiled-coil domain 1 (CALCOCO1), mRNA.	CALCOCO1	0.00449861	-1.18796	0.135711		-0.0251983	0.10006	-0.147839	-0.0279505	-0.0891902	0.03904	0.04724	-0.185288	-0.249209	-0.760422	-0.394975	-0.244076	0.0222843	0.179648	-0.285458	-0.108991	0.215177	0.143261	-0.00326214	-0.0847869	0.0486428	0.109299	0.333783	0.625462	0.216045	0.208021	0.110733	0.0101549	0.38743	0.144587	0.0463291
ILMN_2230902	NM_001903	catenin (cadherin-associated protein), alpha 1, 102kDa (CTNNA1), mRNA.	CTNNA1	0.00572405	-1.18921	0.13879		-0.000422374	-0.318965	-0.301531	-0.0455326	-0.118312	-0.0459616	0.196725	-0.223061	-0.0161666	-0.5761	-0.661602	0.0626603	-0.175468	0.321455	0.0651452	0.19171	0.138808	0.123789	0.138808	-0.0117255	0.293592	0.0133801	0.31372	0.0491449	0.390814	-0.265865	0.384283	0.0594955	0.0232627	0.314045	-0.282197
ILMN_1718128	NM_030979	poly(A) binding protein, cytoplasmic 3 (PABPC3), mRNA.	PABPC3	0.00261369	-1.18922	0.124049		0.106866	0.377823	-0.168379	-0.130319	-0.307016	-0.400744	-0.398872	-0.308745	-0.00790307	-0.164935	-0.617089	-0.00421543	-0.0616986	0.0881207	0.0538162	0.215398	-0.0210167	-0.078601	-0.0428637	0.225734	0.154911	0.0346482	-0.213107	-0.0587002	0.247836	0.356002	0.0718857	0.0122465	0.214052	0.343237	0.309635
ILMN_1761801	NR_003148	tropomyosin 3 pseudogene (LOC147804), non-coding RNA.	LOC147804	0.000165563	-1.18925	0.0601998		-0.0107447	0.0823256	-0.216373	-0.121224	0.0211059	0.0308281	-0.386	-0.0991366	-0.294237	-0.229799	-0.245693	-0.272728	0.0758657	-0.210211	0.00281297	-0.15995	0.089997	-0.0503082	-0.241741	0.243541	0.154688	0.142718	0.0148332	0.146653	0.292621	0.189801	0.180353	0.211383	0.153868	0.457645	0.144036
ILMN_1776963	NM_006816	lectin, mannose-binding 2 (LMAN2), mRNA.	LMAN2	0.00316902	-1.18934	0.124909		-0.266927	-0.390921	-0.307651	-0.365207	-0.0857485	0.114131	-0.0703649	-0.0871539	-0.115674	-0.215886	0.357332	-0.36648	-0.223572	0.160182	-0.0591498	0.0686268	-0.0810274	0.00690349	-0.263224	0.113372	-0.0204549	0.109606	0.186193	-0.24762	0.203816	0.37928	0.477927	0.333809	0.300019	0.18002	0.301329
ILMN_1873620	BU838786	AGENCOURT_8210259 NIH_MGC_112 cDNA clone IMAGE:6258046 5, mRNA sequence	NaN	0.00771203	-1.18992	0.147524		-0.112744	-0.00664362	-0.141827	0.286388	-0.215891	-0.444188	-0.320132	-0.191677	-0.112549	-0.384694	-0.582086	0.112235	-0.136964	0.330877	-0.157719	-0.0754225	0.0614485	0.0289151	0.000531159	-0.39698	-0.0482039	0.191139	0.319965	0.545363	0.351484	0.112363	0.106489	0.355735	0.318766	0.216349	0.0031287
ILMN_3222974	NM_212535	protein kinase C, beta (PRKCB), transcript variant 1, mRNA.	PRKCB	0.000556216	-1.19069	0.0848223		-0.131805	-0.240716	-0.261536	0.237111	-0.181592	-0.103297	-0.0868509	-0.439555	0.00790737	-0.332332	-0.323303	-0.0728782	-0.112476	0.160964	-0.2472	-0.0932346	0.202435	0.101463	0.152427	-0.0644927	0.0419132	-0.0498013	0.0108694	0.316464	0.356645	0.289207	0.216718	0.0738708	0.323827	0.314154	0.0520305
ILMN_1781207	NM_153047	FYN oncogene related to SRC, FGR, YES (FYN), transcript variant 2, mRNA.	FYN	0.00704204	-1.19118	0.14434		-0.14906	0.106854	0.312723	0.00467143	-0.121789	-0.425001	-0.240174	0.0443049	-0.199842	-0.502786	-0.661988	-0.0617348	-0.0951323	-0.0302716	0.0571674	0.14962	0.106854	-0.18584	0.20187	0.0952337	-0.0141542	-0.0730266	0.315032	0.533926	-0.290496	-0.324349	0.262056	0.285951	0.127093	0.329988	0.261716
ILMN_1785158	NM_022373	HERPUD family member 2 (HERPUD2), mRNA.	HERPUD2	0.00277955	-1.19135	0.124734		0.252257	-0.127082	-0.214998	-0.108054	0.111904	-0.813596	-0.0599103	-0.259121	-0.0937835	-0.0738662	-0.442974	-0.259985	0.168118	0.0662365	-0.0142026	0.159266	0.00407765	0.0690697	0.156407	-0.0745236	-0.0984611	0.0128235	0.231628	0.225893	0.011085	0.367093	0.41507	0.072992	0.357792	0.0903691	0.0554634
ILMN_1667199	NM_021199	sulfide quinone reductase-like (yeast) (SQRDL), nuclear gene encoding mitochondrial protein, mRNA.	SQRDL	0.00363598	-1.19139	0.129876		0.0805749	-0.0823074	-0.192812	-0.175316	-0.00249438	0.0699683	-0.411145	-0.426833	-0.117956	-0.332706	-0.403888	0.0238451	0.0314688	0.0587766	-0.176971	-0.509182	0.0568703	-0.0620055	-0.169112	0.401102	0.145989	0.222169	0.2252	0.192899	0.258205	0.225993	0.191612	0.267001	0.334403	-0.0351484	0.442183
ILMN_3302499	XM_001722060	PREDICTED: hypothetical LOC730990 (LOC730990), mRNA.	LOC730990	0.00763821	-1.19184	0.147309		0.356848	0.0739591	-0.0676815	-0.0833421	-0.067881	-0.287927	-0.417578	-0.0920991	-0.202328	0.21474	-0.672965	0.0680662	-0.292187	-0.435872	0.00903636	-0.0202367	0.452112	0.206368	0.161208	0.201263	0.339557	0.467725	-0.0466995	-0.361841	0.228345	-0.19634	0.0663839	0.0149515	0.204827	-0.0117391	0.274586
ILMN_2361807	NM_006812	amplified in osteosarcoma (OS9), transcript variant 1, mRNA.	OS9	0.00199895	-1.19202	0.118502		0.0459161	-0.0400498	-0.338079	0.0339868	-0.149754	-0.175234	0.00841441	-0.0906728	-0.0620122	-0.611534	-0.5725	0.0544363	-0.143121	0.13797	-0.0655554	-0.0206732	0.419003	0.197243	0.0424223	-0.0212522	-0.0202011	0.329079	0.340076	0.501662	0.0184657	-0.124617	0.144038	0.0541849	0.256352	-0.0296646	-0.0223905
ILMN_1745954	NM_014325	coronin, actin binding protein, 1C (CORO1C), transcript variant 1, mRNA.	CORO1C	0.00327185	-1.19281	0.126303		0.0868487	-0.198715	-0.734829	-0.566424	0.27794	-0.332532	-0.139452	-0.162827	-0.128645	0.0281078	0.0938865	-0.138321	-0.0102318	0.203028	-0.068191	0.0615221	-0.0164157	0.219813	-0.00944965	0.0199007	0.124805	-0.0753548	0.04726	0.161543	0.160445	0.314641	0.498325	0.035963	0.199235	0.306397	0.252481
ILMN_2366246	NM_032985	Sec23 homolog B (S. cerevisiae) (SEC23B), transcript variant 2, mRNA.	SEC23B	0.00672061	-1.19325	0.141863		-0.175758	0.0446173	-0.0911579	-0.0198385	-0.0640327	-0.00352655	-0.234968	0.163366	-0.193959	-0.67732	-0.93584	-0.102336	0.0446173	0.228834	0.0394846	0.119785	0.133802	0.147389	0.203739	0.0179154	0.0584387	-0.195323	0.256832	0.436857	0.129103	-0.127522	0.165089	0.18664	-0.158103	0.178451	0.291115
ILMN_3208715	XR_018394	PREDICTED: misc_RNA (LOC440063), miscRNA.	LOC440063	0.00541976	-1.19352	0.13802		0.0676085	-0.0853116	0.0474958	-0.552782	-0.0800676	-0.00921719	-0.0828822	-0.133014	-0.271531	0.133543	0.141021	-0.54537	-0.193088	-0.274938	0.228708	0.213397	-0.51268	-0.0133058	0.101593	0.17492	0.268311	0.477937	-0.261622	0.123764	0.149257	0.102634	0.0698482	0.0011917	0.0840677	0.427352	0.470894
ILMN_2210729	NM_016086	serine/threonine/tyrosine interacting-like 1 (STYXL1), mRNA.	STYXL1	0.00209835	-1.19394	0.118502		-0.0446953	-0.347565	-0.25826	-0.0249269	-0.287152	-0.107563	-0.291935	-0.0863599	-0.191732	0.0520316	-0.615851	0.00303892	-0.120017	0.166055	-0.205527	0.0675779	0.0982824	0.231626	-0.0581629	-0.129608	0.055537	0.110182	0.414709	0.601012	-0.150626	-0.0345266	0.0436	-0.120017	0.353395	0.227922	0.225355
ILMN_2194852	NM_001039797	hypothetical protein LOC649598 (FLJ46309), mRNA.	FLJ46309	0.00385663	-1.19398	0.131475		0.41591	-0.0241518	0.107045	-0.132657	-0.166598	-0.618403	-0.0738286	0.0504598	-0.0347837	-0.0626157	-0.403785	-0.423746	-0.31757	-0.31136	-0.027549	0.0255743	0.312382	0.212441	-0.299451	0.0878318	0.217021	0.14101	0.130311	0.160126	0.589414	-0.156168	-0.0113539	0.0616422	0.103834	0.231805	0.145533
ILMN_1658928	NM_005273	guanine nucleotide binding protein (G protein), beta polypeptide 2 (GNB2), mRNA.	GNB2	0.00162271	-1.19547	0.115688		-0.00841775	-0.311315	-0.362081	0.0323953	0.01823	-0.0353943	-0.0519895	-0.144684	-0.113324	-0.616572	-0.571107	0.113387	-0.171197	0.343334	-0.186979	-0.0380302	0.2722	0.201088	0.138256	0.0653811	0.0621863	0.207784	0.274677	0.131109	-0.0370823	0.432163	0.148408	0.0478338	0.225825	0.149208	0.00344193
ILMN_3233239	XM_001722670	PREDICTED: similar to amyloid beta (A4) precursor protein-binding, family B, member 1 interacting protein (LOC731789), mRNA.	LOC731789	0.00159733	-1.19558	0.115688		0.423619	-0.183703	-0.112305	-0.202073	-0.147222	-0.609624	-0.0592584	-0.0477614	-0.115483	0.0459213	-0.575739	-0.126521	-0.279921	0.074914	-0.0541832	0.123068	0.263472	0.0867064	-0.0586842	-0.143404	0.0224163	0.199951	0.300123	-0.00731063	0.314557	0.0892894	0.218089	0.26535	0.200347	0.311243	-0.0755971
ILMN_3274790	XM_001720571	PREDICTED: similar to LOC283693 protein (LOC648921), mRNA.	LOC648921	0.00182554	-1.19588	0.116861		0.278351	0.123609	-0.185449	-0.0654896	-0.108007	-0.289162	-0.0864118	-0.0526447	-0.159934	0.00962051	-0.277126	-0.440776	-0.509845	-0.124761	0.091751	0.23327	-0.0472145	-0.110115	-0.118969	-0.25483	0.135006	0.399091	-0.0297508	-0.190123	0.328592	0.278351	0.386849	0.331033	0.23327	0.239907	0.188554
ILMN_2408851	NM_181720	Rho GTPase activating protein 30 (ARHGAP30), transcript variant 2, mRNA.	ARHGAP30	0.00411227	-1.19648	0.13262		0.082224	-0.220466	-0.0468889	0.0113525	-0.248032	-0.206717	-0.321048	-0.118097	-0.0431376	-0.673102	-0.619879	-0.0392651	0.0236231	0.415742	-0.015328	0.06849	0.283499	0.162633	-0.0570045	-0.195184	-0.0140869	0.0996793	0.393935	0.425956	0.304789	-0.184345	-0.000899942	0.193029	0.112939	0.244699	0.143619
ILMN_1739641	NM_021090	myotubularin related protein 3 (MTMR3), transcript variant 3, mRNA.	MTMR3	0.00661429	-1.19662	0.141258		0.157272	-0.215061	-0.519483	0.124705	-0.00247711	0.241544	0.0519774	-0.238147	-0.0892172	-0.728418	-0.53825	-0.0147693	-0.0139231	-0.0256126	-0.0259293	0.297151	0.226857	0.349986	-0.0971324	-0.189877	0.0391135	0.0653978	0.388751	0.261064	-0.232225	0.0509248	0.226857	0.176285	0.322872	-0.0772962	0.421823
ILMN_2285375	NM_003104	sorbitol dehydrogenase (SORD), mRNA.	SORD	0.00230962	-1.19732	0.118516		0.0701666	-0.186586	-0.285371	-0.0927478	0.186554	0.0959783	-0.0917961	0.202347	-0.360394	-0.267453	-0.298126	-0.385001	-0.329946	-0.202848	0.217586	-0.0257273	0.134657	-0.0420715	-0.266677	-0.0924305	0.294604	0.185774	0.352755	0.266699	0.153333	0.672937	-0.0621403	0.0262804	-0.14505	0.110568	0.273694
ILMN_2383107	NM_014396	vacuolar protein sorting 41 homolog (S. cerevisiae) (VPS41), transcript variant 1, mRNA.	VPS41	0.00458449	-1.19784	0.135711		0.337498	0.0770424	-0.0262844	-0.206282	-0.0459192	-0.724807	-0.107451	0.0512757	-0.0328412	0.109188	-0.59556	-0.106138	-0.356182	-0.275948	0.0584924	0.308853	0.208105	0.198672	0.00932165	-0.100547	0.253874	0.265775	0.12547	-0.111251	0.300484	-0.341421	0.249461	0.3637	0.14507	0.234723	-0.0514287
ILMN_2249473	NM_178324	serine palmitoyltransferase, long chain base subunit 1 (SPTLC1), transcript variant 2, mRNA.	SPTLC1	0.00132038	-1.19805	0.108553		0.408092	0.0620765	-0.208695	-0.267827	-0.0283382	-0.303838	-0.114079	-0.239116	0.101382	-0.114079	-0.463487	-0.299923	-0.237784	-0.257266	0.154048	0.125006	0.159072	0.392036	-0.133032	0.13435	0.229536	0.327057	-0.067011	-0.121311	0.436956	-0.273277	0.0620765	0.134721	0.149489	0.0704425	0.268067
ILMN_1734814	NM_002154	heat shock 70kDa protein 4 (HSPA4), mRNA.	HSPA4	0.0031296	-1.19831	0.124909		0.428871	-0.0151319	-0.237818	-0.321418	0.0623124	0.0689434	-0.294234	-0.189704	-0.294525	-0.0890146	-0.151129	-0.526132	-0.0870033	-0.361514	0.248624	0.28609	-0.0276996	-0.0203287	0.164318	0.145013	0.262705	-0.153323	0.184915	0.205787	0.51242	-0.470842	0.14186	0.0663466	-0.00162174	0.204396	0.250673
ILMN_2145250	NR_002182	nascent-polypeptide-associated complex alpha polypeptide pseudogene 1 (NACAP1), non-coding RNA.	NACAP1	0.00299691	-1.19843	0.124909		0.138485	0.108797	-0.339345	-0.298195	-0.0439207	0.183595	-0.0263513	-0.00577713	-0.500667	-0.165572	-0.0987043	-0.350994	-0.220676	-0.258645	0.00608948	-0.0567932	-0.198883	-0.134823	-0.24151	0.070133	-0.0516614	0.246588	0.133246	-0.0023114	0.387343	0.382667	0.21259	0.188885	0.15265	0.56014	0.50469
ILMN_1718206	NM_014680	KIAA0100 (KIAA0100), mRNA.	KIAA0100	0.000816475	-1.1989	0.095484		-0.0978266	-0.152892	-0.0660451	-0.0171344	0.207186	-0.334272	-0.0851005	0.0542955	-0.380638	-0.18326	-0.509013	-0.302341	-0.181331	0.0870882	0.0557664	0.14408	0.185151	0.15937	-0.24708	0.0222762	0.0365565	-0.0448716	0.37717	0.242104	0.294969	-0.237347	0.20819	0.0957478	0.0243527	0.474057	0.277137
ILMN_1811909	XM_938988	PREDICTED: similar to actin alpha 1 skeletal muscle protein (LOC402221), mRNA.	LOC402221	0.00787245	-1.19915	0.148567		0.491049	0.056676	-0.375316	-0.0186582	0.122391	-0.0119488	-0.0343738	0.026547	-0.462367	-0.711617	-0.732832	-0.0836835	-0.211273	-0.0496546	-0.045197	0.176291	0.22284	0.224596	-0.163868	0.202473	0.213021	0.196301	0.0317413	-0.0222996	-0.130148	0.266645	-0.0813068	0.0581674	0.356139	0.402304	0.123884
ILMN_2363027	NM_133487	RAD51 homolog (RecA homolog, E. coli) (S. cerevisiae) (RAD51), transcript variant 2, mRNA.	RAD51	0.00225813	-1.19931	0.118516		0.203824	-0.0313918	-0.0177227	-0.0250355	-0.111868	-0.644908	-0.246734	-0.12737	0.00783351	0.0150181	-0.35742	-0.457612	-0.184049	0.0221805	0.150329	0.0662841	0.060093	0.034719	-0.235006	0.0658831	0.102086	0.633633	0.0822791	-0.0425433	0.31548	-0.134615	0.22423	0.288591	0.244776	0.36161	-0.134615
ILMN_1657139	NM_012091	adenosine deaminase, tRNA-specific 1 (ADAT1), mRNA.	ADAT1	0.00446723	-1.19932	0.135711		0.00152546	-0.0975287	0.241231	-0.117609	0.129731	-0.424935	-0.174118	-0.378266	-0.198363	-0.193896	-0.793131	-0.0115778	-0.304258	0.25117	-0.237	0.216848	0.200351	0.31566	-0.100837	0.00769723	0.257476	0.167522	0.392299	-0.0673402	0.226647	-0.172256	0.00902837	0.333758	0.257257	0.227912	-0.091022
ILMN_2225698	NM_004544	NADH dehydrogenase (ubiquinone) 1 alpha subcomplex, 10, 42kDa (NDUFA10), nuclear gene encoding mitochondrial protein, mRNA.	NDUFA10	0.0019155	-1.19935	0.116861		-0.0275699	-0.0150744	-0.290219	0.182143	-0.180665	-0.068401	-0.246263	-0.156339	-0.256381	-0.464383	-0.431834	-0.177631	-0.271475	0.332529	-0.273239	0.0205309	0.112706	0.039763	-0.27298	-0.0835257	0.073038	0.00266729	0.4204	0.306352	0.439072	0.131934	0.241659	0.222015	0.297244	0.256453	0.0088391
ILMN_3275771	XR_038054	PREDICTED: misc_RNA (LOC642567), miscRNA.	LOC642567	0.00468154	-1.19956	0.135711		0.337231	-0.0589706	-0.448293	-0.361769	-0.0301412	0.0626259	-0.172772	-0.214547	-0.0966642	-0.17191	-0.369135	-0.132615	-0.222807	-0.0232409	-0.0360416	0.324711	-0.211084	-0.0418473	0.232187	0.0129123	0.149457	0.527804	-0.0969793	-0.160738	-0.0369904	0.825789	-0.0789998	0.279177	0.0893076	0.141881	0.231303
ILMN_1652928	NM_032831	ORAI calcium release-activated calcium modulator 2 (ORAI2), mRNA.	ORAI2	7.8759e-05	-1.1997	0.0419519		0.0389675	-0.281086	-0.212831	-0.252864	0.0806163	-0.264647	-0.341772	-0.111377	0.176242	-0.283457	-0.175583	-0.150947	-0.0780418	-0.105134	-0.201192	-0.0917309	0.144481	0.358884	0.16477	0.125889	0.0727253	0.304227	0.0634568	-0.046472	0.491021	0.158344	0.163632	0.066853	0.0568004	0.165983	0.0854565
ILMN_1733616	NM_007162	transcription factor EB (TFEB), mRNA.	TFEB	0.00655705	-1.19972	0.141258		0.0377373	-0.398321	-0.374239	0.339845	-0.0720366	-0.133737	-0.19198	-0.179859	0.00456897	-0.480732	-0.299165	-0.233669	-0.264008	0.344711	-0.277854	-0.203842	0.0764081	0.242388	-0.210254	-0.0817151	0.164806	0.148863	0.468227	0.238622	0.123901	0.44345	-0.046257	0.201731	0.557292	0.352433	-0.040601
ILMN_1799208	NM_018590	chondroitin sulfate N-acetylgalactosaminyltransferase 2 (CSGALNACT2), mRNA.	CSGALNACT2	0.0073194	-1.20001	0.14537		-0.0577964	-0.0283395	-0.0880502	-0.0315919	0.163167	-0.428262	-0.416568	-0.167047	-0.322054	-0.659898	-0.0867824	-0.514795	0.365287	0.266848	0.0590025	0.12791	-0.0438957	0.163682	-0.0450487	-0.290301	0.059116	-0.258259	0.125238	0.302555	0.130315	0.199222	0.404915	0.353441	0.465612	0.0241149	0.258425
ILMN_1654320	XM_929199	PREDICTED: hypothetical protein LOC644250 (LOC644250), mRNA.	LOC644250	0.00429379	-1.20002	0.134718		0.327374	-0.0238419	-0.0160274	-0.0741768	-0.0819741	-0.606311	-0.246698	-0.110259	0.104125	0.261683	-0.744764	-0.24842	-0.267068	-0.292502	0.0901335	0.0280226	0.171124	0.199349	-0.129934	0.00505736	0.278512	0.507282	-0.0881186	-0.0756112	0.283686	-0.0974797	0.0574624	0.211442	0.187053	0.317402	0.0751907
ILMN_1753468	NM_001040034	CD63 molecule (CD63), transcript variant 2, mRNA.	CD63	0.00497139	-1.20024	0.135711		-0.13272	-0.40052	-0.44433	0.245287	-0.152626	-0.197956	0.0284228	0.0669009	-0.0282664	-0.0249897	-0.470223	-0.247132	-0.221899	0.0185178	-0.355818	-0.161333	0.21592	-0.0473324	-0.00169144	-0.114189	-0.07134	0.130158	0.32937	0.208324	0.231701	0.826656	0.273744	0.346437	0.194542	0.0899829	-0.000564357
ILMN_1778136	NM_032265	zinc finger, MYND-type containing 15 (ZMYND15), transcript variant 2, mRNA.	ZMYND15	0.00385503	-1.20065	0.131475		0.237351	-0.14909	-0.325815	-0.448868	-0.259375	-0.184822	0.0348216	-0.280362	-0.0784894	-0.413699	-0.141498	0.0987385	0.189768	-0.24153	0.0476756	-0.0140171	0.162208	0.640719	-0.0134984	0.0418152	0.131187	0.55735	0.292449	0.420921	0.0306397	0.231975	-0.279357	-0.152784	0.167036	-0.143054	-0.0197942
ILMN_3226012	XR_019265	PREDICTED: misc_RNA (LOC728698), miscRNA.	LOC728698	0.000494857	-1.20067	0.0832933		-0.293624	0.12779	-0.169764	-0.0639483	-0.154056	-0.349595	-0.104825	-0.0948047	-0.0381452	-0.352635	-0.571443	-0.188596	-0.0413982	0.145107	-0.18965	0.170245	0.153367	-0.0704493	-0.269147	0.124672	0.177048	0.0203162	0.293451	0.470855	0.0296188	0.106664	0.118952	0.240225	0.199061	0.29645	0.00295668
ILMN_1678605	NM_006023	cell division cycle 123 homolog (S. cerevisiae) (CDC123), mRNA.	CDC123	0.00757192	-1.20093	0.146767		0.0890206	-0.243988	-0.51045	-0.016318	-0.0569742	0.239363	-0.372076	-0.375919	-0.404892	-0.468281	-0.0801571	-0.177374	-0.0122923	0.518804	-0.1979	-0.0811588	-0.115905	0.104974	-0.105147	-0.142098	0.0345346	0.0755762	0.36147	0.220777	0.537275	0.341355	0.398788	0.0218916	0.363977	0.178779	0.220777
ILMN_3218538	XR_016204	PREDICTED: similar to hCG2002932 (LOC345645), mRNA.	LOC345645	0.00207636	-1.20171	0.118502		0.245287	-0.00362541	-0.510551	-0.149329	0.086775	0.0032912	-0.487667	-0.126756	-0.213689	-0.0630899	-0.394255	-0.224572	-0.216497	0.0783511	-0.185589	-0.067594	-0.00304084	0.0937969	0.212359	0.174377	0.368111	0.0404372	0.176875	-0.434595	0.0906281	0.387806	0.344443	0.115401	0.327533	0.169439	0.296264
ILMN_1799819	NM_004990	methionyl-tRNA synthetase (MARS), mRNA.	MARS	0.00418438	-1.20177	0.133179		-0.146936	-0.0588227	-0.166428	0.230237	-0.301281	0.213081	-0.375584	-0.283908	-0.0779048	-0.281844	-0.742367	0.0261803	-0.155117	0.117755	-0.118357	0.0122734	-0.0208596	-0.0134746	-0.308535	-0.0388447	0.168065	0.0425297	0.314403	0.157367	0.52135	-0.0127756	0.237637	0.116386	0.168833	0.535201	0.314403
ILMN_1731503	NM_006770	macrophage receptor with collagenous structure (MARCO), mRNA.	MARCO	8.16263e-05	-1.2019	0.0419519		-0.270065	-0.0521534	-0.0354555	-0.472093	-0.194053	-0.191363	-0.129828	-0.168024	-0.0277703	0.216897	-0.0565382	-0.314038	-0.301628	-0.0844023	-0.112628	0.19331	0.0240583	0.0217834	0.0391908	0.0901654	0.291759	0.201661	0.00104624	0.495432	0.0509548	0.224089	0.0843587	0.201671	0.280233	-0.00206998	-0.100995
ILMN_1682928	NM_019029	carboxypeptidase, vitellogenic-like (CPVL), transcript variant 2, mRNA.	CPVL	0.00637027	-1.20213	0.14097		-0.17378	-0.37879	-0.721142	-0.464733	0.109081	-0.132109	-0.254429	0.0646773	0.128442	-0.138304	-0.265144	-0.266367	-0.116137	0.404022	-0.0367978	0.274268	0.373317	-0.126924	-0.358084	0.154737	0.292688	-0.162749	0.418707	0.22454	0.125797	0.404022	0.0872047	0.0916394	-0.13981	-0.0344498	0.249909
ILMN_1691180	NM_014562	orthodenticle homeobox 1 (OTX1), mRNA.	OTX1	0.00405666	-1.20322	0.13243		0.196803	-0.405772	-0.34948	0.135141	0.189227	-0.377095	-0.274484	-0.203726	0.0502151	-0.396985	-0.10481	-0.373091	0.197566	-0.210121	0.596908	-0.166615	0.323006	0.455596	-0.01845	-0.03331	0.0241714	0.268491	0.536336	-0.00327474	-0.0746525	-0.115423	0.156289	0.008895	0.00478949	0.0263582	0.208805
ILMN_1697267	NM_002744	protein kinase C, zeta (PRKCZ), transcript variant 1, mRNA.	PRKCZ	6.65582e-05	-1.2035	0.0419519		0.181427	-0.200887	-0.338005	0.118234	0.00487896	-0.184549	-0.0552373	-0.0712986	-0.170393	-0.321896	-0.281383	-0.454309	-0.30805	0.0756476	-0.0103838	-0.153889	0.292179	0.184371	0.0958123	0.0252101	-0.0159194	0.219446	0.128113	0.282524	0.333617	0.21439	0.0368901	0.0677239	0.148812	0.0831671	0.17539
ILMN_1810275	NM_003982	solute carrier family 7 (cationic amino acid transporter, y+ system), member 7 (SLC7A7), mRNA.	SLC7A7	0.0059725	-1.20359	0.139626		0.0589099	-0.481928	-0.419419	-0.461605	-0.0698484	0.0930733	-0.103395	-0.0420594	-0.0737352	-0.454952	0.0472623	-0.26779	-0.0480733	0.197295	-0.307892	0.156054	0.43837	0.0319946	-0.187549	0.180152	0.694062	-0.219658	0.231389	-0.140677	0.167557	0.113155	0.266959	-0.0420594	0.0313693	0.501328	0.169777
ILMN_3283772	XR_039184	PREDICTED: misc_RNA (LOC644237), miscRNA.	LOC644237	0.00537545	-1.20406	0.13802		-0.839517	-0.390859	-0.302464	-0.0904354	-0.184673	-0.272093	0.0395101	-0.0591405	0.088889	-0.0938432	-0.257291	-0.161694	-0.112217	0.556502	-0.320817	-0.266321	0.143508	0.417056	0.116883	-0.0112985	0.158312	0.186892	0.188037	0.160976	0.0999701	0.278272	0.294899	0.165561	0.0252993	0.3213	0.0709449
ILMN_1695468	NM_182692	SFRS protein kinase 2 (SRPK2), transcript variant 1, mRNA.	SRPK2	0.000102384	-1.20537	0.0448977		0.108618	-0.112194	-0.207899	-0.123811	-0.0354287	-0.158596	-0.38681	-0.24349	-0.350858	-0.335493	-0.225106	-0.0599786	-0.0976908	0.252314	-0.0634956	0.0523929	0.121436	0.471156	-0.188525	-0.035849	0.0908557	0.175259	0.338212	0.250307	0.240425	-0.0243327	0.161329	0.12541	0.176951	0.204874	0.0847526
ILMN_2402106	NM_014511	killer cell immunoglobulin-like receptor, two domains, long cytoplasmic tail, 3 (KIR2DL3), transcript variant 1, mRNA.	KIR2DL3	0.00186037	-1.20626	0.116861		-0.202122	-0.245726	-0.0694812	-0.359151	-0.135828	-0.133462	-0.475661	0.324265	-0.200704	-0.425733	-0.218685	-0.211449	0.387516	-0.0317286	-0.0402073	0.217233	0.10167	0.172271	0.230574	0.403277	0.433141	-0.0330344	0.135283	0.015535	0.251484	-0.138559	-0.195136	0.283592	-0.155502	0.129123	0.36244
ILMN_2265995	NM_032264	neuroblastoma breakpoint family, member 3 (NBPF3), mRNA.	NBPF3	0.000259565	-1.20628	0.0718438		-0.182854	0.0809659	-0.457116	-0.0714065	-0.256071	-0.0360608	-0.0198212	-0.115331	0.0400473	0.0292032	-0.137633	-0.243674	-0.465524	-0.222546	0.0358185	-0.0912543	-0.0076504	0.147712	0.317375	0.0989334	0.215574	0.187435	-0.258646	0.0819597	0.0146649	-0.066693	0.449446	0.330456	-0.00153789	0.336168	0.311068
ILMN_1779258	XM_927868	PREDICTED: similar to Phosphoglycerate kinase 1 (LOC644774), mRNA.	LOC644774	0.00308705	-1.20698	0.124909		0.123182	-0.177149	-0.441023	-0.144552	0.0117213	-0.494684	-0.274205	-0.094456	-0.374248	-0.278676	-0.016441	-0.139236	-0.0956259	0.296117	-0.166923	-0.361695	-0.00396833	0.199803	0.0336539	-0.219576	0.249646	-0.151732	0.413331	0.378747	0.149371	0.490128	0.460877	0.158519	0.0968248	0.171988	0.165775
ILMN_1810488	NM_014223	nuclear transcription factor Y, gamma (NFYC), mRNA.	NFYC	0.00159761	-1.20797	0.115688		0.101094	-0.155189	-0.548835	0.10948	-0.0988217	-0.0913153	-0.327885	-0.167457	-0.0133827	-0.421736	-0.618528	0.0204418	0.0702607	0.180798	-0.222113	0.00849119	0.309941	0.0918466	-0.175597	-0.0279044	0.0584927	0.120299	0.246806	0.506301	0.179926	0.169624	0.253669	0.135083	0.287468	0.301029	0.00932657
ILMN_1808299	NM_014869	IQ motif and Sec7 domain 1 (IQSEC1), mRNA.	IQSEC1	0.00677326	-1.2089	0.142262		0.0740509	-0.246322	-0.548754	-0.0355823	-0.206176	0.147954	-0.167309	-0.14505	-0.14147	-0.69524	-0.489346	-0.093338	0.0741364	0.583187	-0.136679	-0.0258751	0.18162	0.356169	-0.0913971	-0.250279	-0.0083436	0.11365	0.144411	0.508335	0.173004	0.293017	0.143542	0.100275	0.208515	0.220292	0.428449
ILMN_1681984	NM_017540	UDP-N-acetyl-alpha-D-galactosamine:polypeptide N-acetylgalactosaminyltransferase 10 (GalNAc-T10) (GALNT10), transcript variant 2, mRNA.	GALNT10	0.00468112	-1.20943	0.135711		0.118614	-0.068413	0.296447	-0.162644	-0.151185	-0.25845	-0.0788397	-0.0761961	-0.472117	-0.520996	-0.627205	-0.193863	0.0672747	0.072721	0.0240776	-0.0141935	0.182639	-0.060618	-0.532713	-0.0760824	-0.0501063	0.0467224	0.424072	0.448332	0.181916	0.360295	0.283837	0.209476	0.285272	0.288067	0.167308
ILMN_2380494	NM_001157	annexin A11 (ANXA11), transcript variant a, mRNA.	ANXA11	0.000706666	-1.20951	0.0932123		0.353797	0.239092	-0.387092	-0.105852	0.114212	0.0667425	-0.168592	-0.0926832	-0.203321	-0.544308	-0.420109	-0.267362	-0.155305	-0.412714	0.208637	0.178652	0.215356	0.368653	-0.0847978	-0.0221619	-0.0109792	0.304384	0.166921	0.0136569	-0.0337456	0.0425516	0.102981	0.205122	0.146382	0.269761	0.185383
ILMN_1680279	NM_018561	ubiquitin specific peptidase 49 (USP49), mRNA.	USP49	0.00285082	-1.20952	0.124909		0.378718	0.199277	-0.170935	-0.219509	-0.00996145	-0.577984	-0.210124	-0.0752009	0.0233316	-0.209084	-0.50735	-0.298567	-0.278238	-0.0861953	0.224714	0.243564	0.116625	0.344467	-0.106242	-0.162867	0.305584	0.429418	0.20717	-0.0145248	0.277423	-0.316606	0.224714	-0.0704286	0.121626	-0.0679857	0.429418
ILMN_1753805	NM_016457	protein kinase D2 (PRKD2), mRNA.	PRKD2	0.00507276	-1.21049	0.135711		0.0678157	-0.144308	-0.2331	0.113598	-0.236143	-0.0547204	0.0197382	-0.301749	0.0324941	-0.290994	-0.867554	0.268997	-0.22873	-0.147198	-0.240742	0.0708631	0.366686	0.332891	0.159045	-0.205024	0.0232791	0.646237	0.0911611	0.239758	0.191919	-0.189941	-0.105695	0.233877	0.410004	0.158133	0.0716861
ILMN_1729294	NM_018434	ring finger protein 130 (RNF130), mRNA.	RNF130	0.00390055	-1.21067	0.131475		0.0922548	-0.377831	-0.559674	-0.295853	0.0463547	-0.0754973	-0.255904	-0.0125046	-0.0505586	-0.545683	0.0968966	-0.285949	0.0754271	0.246714	-0.148857	-0.165459	0.152447	0.368852	0.298779	0.176149	0.252301	-0.353526	0.265176	0.285284	-0.105746	0.364931	0.398288	-0.0971055	0.391304	-0.0105296	0.307131
ILMN_1707804	NM_003166	sulfotransferase family, cytosolic, 1A, phenol-preferring, member 3 (SULT1A3), transcript variant 1, mRNA.	SULT1A3	0.00651355	-1.21176	0.1411		-0.362437	0.00783675	-0.358446	0.0935091	-0.240779	-0.360849	-0.150766	0.048289	-0.280969	-0.307021	-0.288579	0.210411	-0.524064	0.548865	-0.157544	-0.303848	0.353226	0.374908	0.143038	-0.127374	0.255682	0.0208878	0.30713	0.357808	0.334266	0.341677	-0.20673	0.159469	0.409916	-0.127179	0.189339
ILMN_1694596	NM_018099	fatty acyl CoA reductase 2 (FAR2), mRNA.	FAR2	0.00542082	-1.21217	0.13802		-0.199379	0.0244285	-0.495077	0.0247169	-0.200973	0.177614	-0.0891957	-0.0040784	-0.25087	-0.556469	-0.0833058	-0.049157	-0.331317	0.173036	-0.128699	0.103431	0.0766602	0.469237	0.00286049	-0.375878	0.307317	0.48174	0.381073	0.176138	-0.0563178	0.379761	0.184599	-0.286909	0.563077	-0.153456	0.335731
ILMN_2075436	NR_002305	protein disulfide isomerase family A, member 3 pseudogene (PDIA3P), non-coding RNA.	PDIA3P	0.000433161	-1.21228	0.0830069		-0.0660215	-0.118377	-0.0976329	0.149593	0.0329547	-0.139429	-0.249332	-0.0444312	-0.134122	0.0114818	-0.357027	-0.61709	-0.313303	-0.150356	-0.134212	0.222207	-0.0487574	0.0602945	-0.217274	-0.150318	0.0986656	0.0283218	0.218086	0.466616	0.390765	0.0577437	0.117974	0.2315	0.156797	0.352003	0.329299
ILMN_1675656	NM_003621	PTPRF interacting protein, binding protein 2 (liprin beta 2) (PPFIBP2), mRNA.	PPFIBP2	0.00404064	-1.21253	0.13243		-0.0123462	-0.23592	-0.795602	0.109639	-0.185957	0.171616	0.0129579	-0.275888	0.305776	-0.811109	-0.346311	-0.18157	0.0925721	-0.182832	0.357881	0.306415	0.215172	0.0532044	0.110288	0.0626243	0.0420595	-0.0219266	-0.141639	-0.135492	0.177108	0.128989	0.151082	0.165157	0.0184176	0.388323	0.0132913
ILMN_1715674	NM_014216	inositol 1,3,4-triphosphate 5/6 kinase (ITPK1), mRNA.	ITPK1	0.00637464	-1.21332	0.14097		0.326359	-0.450475	-0.530472	0.249781	-0.0210485	0.0959107	-0.0917046	-0.0721669	-0.247238	-0.736856	-0.545535	-0.0622013	-0.018407	0.223497	-0.122387	-0.10682	0.218484	0.345461	-0.057937	-0.150394	0.22385	0.433225	0.241613	0.369929	-0.00777385	-0.0154218	0.134557	0.210798	0.472368	0.184226	0.0850063
ILMN_1682953	NM_001029891	phosphoglycerate mutase family member 4 (PGAM4), mRNA.	PGAM4	0.00173543	-1.21337	0.116861		0.126081	-0.113593	-0.138083	0.0569909	0.0134531	-0.397846	-0.18922	-0.200665	0.0711224	-0.637337	-0.281612	-0.429411	-0.0995014	0.140739	0.0328553	0.051402	-0.150707	0.0684159	-0.151167	-0.174423	0.437971	0.0313779	0.0102773	0.102381	0.0788342	0.400735	0.392525	-0.0522037	0.321299	0.327629	0.49186
ILMN_3206804	NR_024424	hypothetical LOC255167 (LOC255167), non-coding RNA.	LOC255167	0.00676546	-1.21355	0.142262		0.363943	0.172674	-0.0982171	0.0567204	-0.00452937	-0.514711	-0.00452937	-0.128162	-0.173408	-0.0399721	-0.671105	-0.221715	-0.385705	-0.415969	0.184333	0.496601	-0.0522863	0.0964545	-0.265711	-0.364998	0.209105	0.156499	0.0125212	0.00213955	0.562885	0.202796	0.111025	0.383214	0.327619	0.339726	-0.162066
ILMN_1775762	NM_002070	guanine nucleotide binding protein (G protein), alpha inhibiting activity polypeptide 2 (GNAI2), transcript variant 1, mRNA.	GNAI2	0.00748437	-1.21359	0.146391		0.36255	-0.160073	-0.43014	0.00704435	0.0158236	0.157312	-0.180867	-0.0513265	-0.152464	-0.681766	-0.868213	-0.0378787	-0.197164	0.137481	-0.148433	0.0881606	0.429538	0.167472	-0.140983	-0.0516301	0.2013	-0.000457631	0.476087	0.58133	0.2618	-0.0516301	0.00547149	0.0516905	0.0567634	0.199605	0.0964141
ILMN_1758626	NM_000202	iduronate 2-sulfatase (Hunter syndrome) (IDS), transcript variant 1, mRNA.	IDS	0.00747499	-1.21432	0.146391		0.142747	-0.0562173	-0.416566	-0.197408	-0.0322579	-0.177992	-0.257507	-0.23597	-0.245954	-0.690681	-0.241888	-0.0246081	0.388928	0.24377	0.00403444	0.0594511	0.0693734	0.565814	0.392729	-0.441128	0.133335	0.289479	0.33821	-0.0137632	-0.250248	0.211679	0.406632	-0.163895	0.19639	0.349791	0.427009
ILMN_2219618	NR_002773	AOC3 pseudogene (LOC90586), non-coding RNA.	LOC90586	0.00234883	-1.21471	0.118516		0.274184	0.1484	-0.0671596	-0.0544002	-0.191666	-0.410742	-0.143097	-0.124713	-0.0980092	0.106881	-0.68417	-0.542502	-0.220844	-0.109357	0.13281	0.205748	0.0999577	0.150929	-0.168022	-0.183376	0.335796	0.282317	0.141064	-0.0980092	0.479334	-0.282513	0.161473	0.357174	0.0370131	0.265493	0.282317
ILMN_1690321	NM_001077440	BCL2-associated transcription factor 1 (BCLAF1), transcript variant 2, mRNA.	BCLAF1	0.000877098	-1.21475	0.0955633		-0.0514545	0.198309	-0.311511	-0.1551	0.054498	-0.381232	-0.126555	-0.162464	-0.0348572	-0.215636	-0.220262	-0.501156	-0.215443	0.0180558	0.0103648	0.269829	-0.0603108	-0.047513	-0.0862893	-0.180205	-0.00358939	0.169922	0.346854	0.451008	0.400507	-0.0353376	0.421096	0.196734	0.0915399	0.480651	-0.209788
ILMN_2197846	NM_000183	hydroxyacyl-Coenzyme A dehydrogenase/3-ketoacyl-Coenzyme A thiolase/enoyl-Coenzyme A hydratase (trifunctional protein), beta subunit (HADHB), nuclear gene encoding mitochondrial protein, mRNA.	HADHB	0.0055609	-1.21504	0.13879		-0.107831	-0.0571036	-0.279551	0.145519	-0.0807414	0.183898	-0.130827	-0.135212	-0.168004	-0.757917	-0.776393	-0.243116	-0.0186341	0.308781	-0.207153	0.0411706	0.0735703	0.0701216	-0.23004	-0.0385914	0.171301	-0.0900575	0.205881	0.429875	0.267219	0.236615	0.284753	0.142961	0.483121	0.419887	-0.054363
ILMN_2388142	NM_134445	CD99 molecule-like 2 (CD99L2), transcript variant 3, mRNA.	CD99L2	0.000480049	-1.21537	0.0832933		-0.0368122	0.124525	-0.251938	-0.421044	-0.0580303	0.102822	-0.193541	0.0785486	-0.187475	-0.231057	-0.881401	-0.100184	-0.245931	0.0212402	-0.0668407	0.107673	0.294568	0.184302	-0.101819	0.23819	0.0783985	0.181639	0.248531	0.181574	0.157661	0.0412845	0.177332	-0.106603	0.000157948	0.276362	0.12241
ILMN_1673421	XM_944716	PREDICTED: hypothetical gene supported by BC042042 (LOC440704), mRNA.	LOC440704	0.00343735	-1.21552	0.127602		0.383274	0.076273	-0.174737	0.00523802	-0.0283852	-0.353593	-0.20466	-0.0543917	-0.166674	0.00873542	-0.67946	-0.338861	-0.380162	-0.253885	0.0371894	0.25577	0.109709	-0.0220424	-0.174202	0.0726551	-0.0742701	0.351876	0.00390981	0.0216898	0.265912	-0.406744	0.204385	0.303106	0.353487	0.6184	0.241597
ILMN_1764456	NM_014844	tectonin beta-propeller repeat containing 2 (TECPR2), mRNA.	TECPR2	0.00293805	-1.21565	0.124909		-0.000888782	-0.313313	-0.45595	-0.349491	0.0424192	0.243538	-0.529513	-0.384715	-0.110048	-0.260587	-0.187299	-0.00956947	-0.0262577	0.368187	0.00638778	-0.0405488	0.0216771	0.462175	0.277946	-0.124697	-0.0712867	0.315388	0.129955	0.268875	0.191006	-0.401696	0.379982	0.200489	0.228543	0.144185	0.404533
ILMN_2290628	NM_172217	interleukin 16 (lymphocyte chemoattractant factor) (IL16), transcript variant 2, mRNA.	IL16	0.00375612	-1.21566	0.131475		0.213777	-0.317349	-0.107203	-0.0692862	-0.141579	-0.0418772	-0.457932	-0.250255	-0.00853142	-0.34271	-0.207468	-0.264228	-0.00853142	-0.114242	0.579742	-0.170297	0.151003	0.26241	-0.311316	-0.214823	0.351474	-0.0848763	-0.22895	0.0221013	0.536296	0.154166	0.370667	0.068059	0.0519657	0.67022	0.0105187
ILMN_2123559	NM_198549	family with sequence similarity 73, member A (FAM73A), mRNA.	FAM73A	0.00264665	-1.21717	0.124049		0.480882	0.0814602	-0.0381945	-0.194129	-0.195734	-0.492444	-0.518542	-0.0631514	-0.0104288	0.157564	-0.359786	-0.473091	-0.299691	-0.26821	0.0603423	0.087376	0.189607	0.16451	-0.131384	-0.0410452	0.19011	0.451028	-0.177847	-0.13043	0.491999	-0.0282145	0.205765	0.261106	0.31616	-0.0116573	0.259131
ILMN_1710482	NM_001642	amyloid beta (A4) precursor-like protein 2 (APLP2), mRNA.	APLP2	0.00790098	-1.21829	0.148596		-0.16054	-0.284001	-0.698314	-0.0487302	-0.157483	0.149103	-0.0310799	-0.180632	-0.0243667	-0.516823	-0.577519	-0.142402	0.00699953	0.637499	-0.243078	-0.103037	0.166841	0.202635	0.0165583	-0.207412	0.238803	0.0121282	0.281633	0.384603	0.0808445	0.246234	0.257074	0.31722	0.475006	0.429123	-0.17561
ILMN_1706841	NM_001029891	phosphoglycerate mutase family member 4 (PGAM4), mRNA.	PGAM4	0.00155079	-1.21953	0.115137		0.0799525	-0.112181	-0.170545	-0.0192227	0.0837997	-0.414368	-0.243066	-0.00723871	-0.132557	-0.626236	-0.475232	-0.306425	-0.163797	0.392818	-0.0215048	-0.0215048	-0.131896	0.055457	-0.0758248	-0.217008	0.266275	-0.0662406	0.281619	0.165892	0.15412	0.281619	0.474846	0.342981	0.20112	0.30894	0.301203
ILMN_2059173	NM_024881	solute carrier family 35, member E1 (SLC35E1), mRNA.	SLC35E1	0.000896034	-1.21959	0.0955633		0.29926	-0.0316331	-0.225832	0.102007	-0.0345404	-0.368735	-0.237876	0.0115718	-0.267405	0.0400857	-0.314023	-0.191696	-0.640217	-0.348045	0.0192831	-0.0946548	0.202811	0.180868	-0.027491	0.0369778	0.0164696	0.183461	-0.115803	-0.195404	0.440123	-0.0261493	0.353573	0.206916	0.304914	0.301654	0.401073
ILMN_2044027	NM_001039379	chromosome 20 open reading frame 191 (C20orf191), mRNA.	C20orf191	0.000762491	-1.22075	0.0932123		0.0268754	0.0745462	-0.192127	-0.143204	-0.051018	-0.3286	-0.273031	-0.0874388	-0.180732	-0.324095	-0.601157	-0.199232	-0.138777	0.257577	0.00141421	-0.124232	0.175156	0.191422	-0.0541075	-0.125332	-0.149748	0.112261	0.500449	0.234867	0.411633	0.0356512	0.330654	0.370312	0.160197	0.376826	-0.178679
ILMN_3289685	XM_939733	PREDICTED: similar to hCG1782414 (LOC645452), mRNA.	LOC645452	0.00291486	-1.22118	0.124909		0.343488	0.0193908	-0.0493748	-0.0172909	-0.062	-0.337271	-0.23343	-0.0284968	-0.123544	-0.0703655	-0.473269	-0.615161	-0.155525	-0.38998	0.30064	0.0204294	0.246166	0.402131	-0.22273	-0.0408068	0.304467	0.262529	0.176625	-0.0311467	0.446305	-0.545501	0.0106697	0.203804	0.121725	0.378039	0.204534
ILMN_1767360	NM_000628	interleukin 10 receptor, beta (IL10RB), mRNA.	IL10RB	0.0019037	-1.22166	0.116861		0.313214	-0.0132174	-0.555898	0.035122	0.160352	-0.123511	-0.256623	-0.299921	0.0320849	-0.67502	-0.363906	-0.32976	-0.0445118	0.0481688	0.29999	0.069041	0.0312128	0.286035	-0.100635	-0.253105	0.0162378	0.131074	0.172075	0.213382	0.0647093	0.360217	0.362459	0.192701	0.530345	0.0277751	-0.0109584
ILMN_1665107	NM_022334	integrin beta 1 binding protein 1 (ITGB1BP1), transcript variant 2, mRNA.	ITGB1BP1	0.0055948	-1.2226	0.13879		-0.0658371	-0.0523168	-0.297976	-0.438719	-0.151256	-0.518743	-0.240727	-0.235404	-0.218941	-0.0574188	-0.0159261	-0.213346	0.149052	0.239105	0.247662	0.604959	-0.0281679	0.0855448	0.0034317	0.499677	0.42233	-0.161548	-0.285902	0.153561	0.0541788	-0.425744	-0.256759	0.0987307	0.37075	0.48289	0.491248
ILMN_3241758	NM_001099771	POTE ankyrin domain family, member F (POTEF), mRNA.	POTEF	0.00745635	-1.22317	0.146391		0.166872	0.07279	-0.181861	0.0681999	0.0830944	0.166872	-0.199513	-0.0329644	-0.302793	-0.81768	-1.09295	0.00103927	-0.335653	0.07279	-0.117449	0.0920738	0.222647	0.0830944	0.162674	0.0405984	0.139999	0.025009	0.395247	0.383392	-0.0836101	0.103154	0.293094	0.00580415	0.336727	0.179159	-0.152503
ILMN_3201975	XR_017134	PREDICTED: misc_RNA (LOC392285), miscRNA.	LOC392285	0.00822168	-1.22331	0.149955		0.00475774	-0.16206	-0.167421	-0.410004	-0.135402	-0.137185	0.0251138	-0.219862	-0.131397	0.242349	0.34424	-0.951848	-0.339438	-0.130329	0.0343329	-0.00765879	-0.109943	-0.237931	0.048639	0.0990627	0.383145	0.451041	-0.151428	-0.0934188	0.698159	0.348898	-0.174943	0.386127	0.0995668	0.411046	0.125507
ILMN_2092850	NM_006665	heparanase (HPSE), mRNA.	HPSE	0.000644312	-1.22411	0.0904631		0.269641	-0.0350208	-0.410521	-0.398544	-0.137391	-0.207669	-0.21266	-0.00367891	0.0636174	-0.234564	-0.321936	-0.139903	-0.322486	0.0202197	-0.0793048	-0.171525	0.234904	0.320822	0.012665	0.128077	0.369481	0.247013	0.0396275	0.377369	0.322879	-0.171234	0.522717	0.236677	-0.202453	-0.0585181	0.315579
ILMN_2162367	NM_007068	DMC1 dosage suppressor of mck1 homolog, meiosis-specific homologous recombination (yeast) (DMC1), mRNA.	DMC1	0.0054561	-1.22484	0.13841		0.44492	0.122639	-0.120412	-0.197148	0.036755	-0.540697	-0.16849	0.0683168	-0.13923	0.0882	-0.679841	-0.408226	-0.313632	-0.442825	0.402752	0.0398041	0.257982	0.361814	0.0494566	-0.19833	0.294488	0.224423	0.033763	-0.21911	0.563778	-0.364275	0.0381249	0.255642	0.0126658	0.261499	0.227818
ILMN_3265143	XM_001721688	PREDICTED: hypothetical protein LOC100129502 (LOC100129502), mRNA.	LOC100129502	0.00124244	-1.22579	0.107431		0.391926	0.0250366	0.0809256	-0.0860414	-0.178704	-0.386142	-0.114726	-0.165756	-0.351362	0.207383	-0.56345	-0.34004	-0.461884	-0.248831	0.071477	0.204951	0.108587	-0.0941027	-0.0373791	-0.00743788	0.113851	0.491165	-0.128363	0.0528022	0.270911	-0.0842921	0.297789	0.0602138	0.42011	0.169306	0.422166
ILMN_1769705	NM_001013699	histone H3-like (LOC440093), mRNA.	LOC440093	0.00541935	-1.2259	0.13802		0.315675	-0.361546	-0.64972	0.120449	0.163102	-0.0106387	-0.390757	-0.533379	-0.0822366	-0.696437	-0.371514	-0.158526	0.285636	0.256098	-0.293668	-0.154605	0.211492	0.293314	0.229071	0.0066346	0.125684	0.0760598	0.143377	0.204878	0.193128	0.335894	0.270051	0.155084	0.132281	0.0335445	0.466368
ILMN_1686906	NM_021202	tumor protein p53 inducible nuclear protein 2 (TP53INP2), mRNA.	TP53INP2	0.00672269	-1.2269	0.141863		0.32502	-0.204127	-0.520438	-0.119395	-0.103309	-0.000640454	-0.32424	-0.256674	-0.243105	-0.66227	-0.345456	0.0835222	0.090481	0.253647	-0.34616	-0.0382053	0.201846	0.577349	0.129192	-0.107866	-0.184904	0.236127	0.137433	0.449856	0.6046	0.328609	0.218183	-0.303083	0.0992764	0.151836	0.39989
ILMN_1674034	NM_138609	H2A histone family, member Y (H2AFY), transcript variant 1, mRNA.	H2AFY	0.00690212	-1.22721	0.142262		0.168125	-0.409688	-0.549418	-0.0908339	0.114424	-0.584929	-0.161522	0.119613	-0.146457	-0.741253	-0.178018	-0.318952	0.306166	0.199238	0.0126857	0.356953	0.478713	0.420141	-0.250971	-0.188535	0.130035	-0.123895	0.406766	0.417652	0.080059	0.188525	0.277727	-0.137757	0.268971	-0.107246	0.0309993
ILMN_1686662	XR_001373	PREDICTED: chromosome 15 open reading frame 28 (C15orf28), misc RNA.	C15orf28	0.00549584	-1.22755	0.13879		0.284385	0.04001	-0.561595	-0.0456241	0.0617765	-0.658298	-0.0452274	-0.0923684	0.0161695	-0.157014	-1.10444	0.0477581	-0.0533769	0.0255093	0.265534	-0.12208	0.190211	0.0640444	0.164712	0.0791982	0.0651829	-0.0700238	0.360038	0.0901572	0.268729	-0.248079	0.227278	0.250297	0.32171	0.216228	0.18233
ILMN_3304898	XR_016140	PREDICTED: misc_RNA (LOC92755), miscRNA.	LOC92755	0.00397818	-1.22768	0.132426		-0.302991	-0.0403941	-0.135896	0.0445733	-0.320996	-0.231461	-0.192703	-0.173051	-0.111149	-0.255038	-0.827074	0.0617792	-0.162539	0.319343	-0.160031	0.447064	0.0810717	-0.204378	-0.269006	-0.290137	0.0474115	0.0341689	0.413879	0.466501	0.29805	0.202568	0.167237	0.333119	0.328798	0.459324	-0.15118
ILMN_1724145	NM_003655	chromobox homolog 4 (Pc class homolog, Drosophila) (CBX4), mRNA.	CBX4	0.00290575	-1.22794	0.124909		-0.135553	-0.176169	-0.0077149	0.179762	-0.0239278	-0.470286	-0.339966	-0.152408	-0.149416	-0.831118	-0.259255	-0.173157	-0.0494863	0.398389	-0.24554	-0.105061	0.182283	0.324439	0.0345198	-0.144514	0.0469568	-0.0266965	0.431286	0.530965	0.45359	0.160622	0.0389361	0.310299	0.248176	0.122197	0.013929
ILMN_3249560	XM_001718070	PREDICTED: similar to mitogen-activated protein kinase phosphatase x (LOC100134291), mRNA.	LOC100134291	0.00586981	-1.22826	0.13879		0.159895	-0.00716839	-0.219984	-0.13853	0.144279	-0.282204	-0.498003	-0.187645	0.0952885	-0.169979	-0.0889089	-0.496544	-0.15229	-0.206175	0.238082	0.166886	-0.184185	0.0453152	-0.269919	0.495379	0.0546677	0.36947	-0.197317	-0.422985	0.223164	0.572429	0.150281	-0.0335938	0.169952	0.857108	0.320995
ILMN_1683277	NM_024874	KIAA0319-like (KIAA0319L), transcript variant 1, mRNA.	KIAA0319L	0.00600345	-1.22827	0.139626		0.0390326	-0.50888	-0.486216	0.571752	-0.18831	-0.296347	0.0838194	-0.162071	0.154756	-0.55955	-0.476931	-0.195905	-0.158797	0.0669332	-0.230958	-0.128006	0.336404	0.161682	0.0208349	-0.0467184	0.198074	0.274987	0.0541502	0.171443	0.141186	0.545832	-0.0475318	0.530889	0.469377	-0.228475	0.249254
ILMN_1768551	XM_940702	PREDICTED: hypothetical LOC197135, transcript variant 5 (LOC197135), mRNA.	LOC197135	0.00613634	-1.22869	0.140468		0.31951	-0.151759	0.117244	-0.00322883	-0.248619	-0.0905426	0.0627718	-0.293998	-0.43776	0.0323943	-0.656565	-0.513377	-0.256229	-0.54722	-0.210785	-0.127403	0.541999	-0.114352	-0.000445177	0.281653	0.0566301	0.39309	0.422166	0.203341	0.26825	-0.420287	-0.287801	0.0302424	0.310333	0.0947866	0.370583
ILMN_1669674	NM_006586	canopy 3 homolog (zebrafish) (CNPY3), mRNA.	CNPY3	0.00269541	-1.22946	0.124099		-0.221612	-0.33481	-0.341307	0.316342	-0.112959	-0.686931	-0.102688	-0.325764	0.0474039	-0.623349	-0.124441	-0.123443	0.0377139	0.501623	-0.0352133	-0.22752	0.095381	0.27547	0.0680593	-0.0460346	0.18023	-0.0199112	0.439049	0.258076	0.0885059	0.196039	0.267956	0.358834	0.403615	0.115244	0.105728
ILMN_1713603	NM_002738	protein kinase C, beta 1 (PRKCB1), transcript variant 2, mRNA.	PRKCB1	0.00140376	-1.23028	0.109979		0.334405	-0.0672004	-0.349484	-0.022895	0.214217	0.0151292	-0.439091	-0.25615	-0.0939638	-0.731141	-0.544689	-0.156923	-0.144966	0.0523051	0.00970979	0.275543	0.146356	-0.0186197	-0.0834162	-0.058979	0.226492	-0.100113	0.304567	0.334405	0.407459	0.259175	-0.0625366	0.114059	0.220221	0.422607	0.0259482
ILMN_2346137	NM_001044387	zinc finger protein 557 (ZNF557), transcript variant 2, mRNA.	ZNF557	0.00018967	-1.231	0.0640392		0.369515	-0.14467	-0.249986	-0.274817	-0.28551	-0.284536	-0.138568	-0.0987758	-0.190325	0.0080147	-0.111434	-0.324273	-0.440225	-0.106972	0.0326738	0.200909	-0.0886667	0.0237483	-0.16294	-0.0221339	0.162634	0.408136	0.123607	-0.179627	0.31506	0.0991111	0.193153	0.255637	0.380903	0.508495	0.0868733
ILMN_1755462	NM_020120	UDP-glucose ceramide glucosyltransferase-like 1 (UGCGL1), transcript variant 1, mRNA.	UGCGL1	0.00576665	-1.23123	0.13879		-0.10334	-0.163621	-0.30227	-0.0150013	-0.159987	-0.791532	-0.0100425	-0.178363	0.0869008	-0.293897	-0.375259	-0.450986	-0.0533527	0.481907	-0.142048	-0.212587	0.291882	0.345638	-0.164957	-0.339727	0.0738104	-0.00178671	0.631184	0.558748	0.325003	0.141819	0.178674	0.153587	0.326419	0.194424	-0.0862641
ILMN_2175094	NM_198795	tudor domain containing 1 (TDRD1), mRNA.	TDRD1	0.000458474	-1.23131	0.0832933		0.210872	-0.0571559	-0.154209	0.112819	-0.0150119	-0.489718	-0.0219591	-0.386467	-0.1916	-0.0890607	-0.567703	-0.438907	-0.150498	-0.00414652	0.0147258	-0.0375182	-0.0449059	0.152674	-0.128796	-0.0956438	-0.0390792	0.0810186	0.214056	0.150105	0.451132	0.174504	0.0358372	0.497219	0.28104	0.385508	0.288061
ILMN_1661647	XM_935296	PREDICTED: similar to tousled-like kinase 2, transcript variant 2 (LOC646144), mRNA.	LOC646144	0.00262912	-1.23141	0.124049		0.230708	-0.214474	-0.306888	-0.233748	0.0464569	-0.550491	-0.164999	-0.131546	-0.236594	-0.00662053	-0.505765	-0.293593	-0.0146368	0.186114	0.0153915	0.0134331	0.175688	0.392567	-0.422128	-0.355465	0.0149462	0.179987	0.397674	-0.0644553	0.304641	0.113606	0.54831	0.163003	0.540754	0.308393	0.112248
ILMN_1658579	NM_176095	CDK5 regulatory subunit associated protein 3 (CDK5RAP3), transcript variant 1, mRNA.	CDK5RAP3	0.00106399	-1.23301	0.100197		-0.282107	-0.32879	-0.156982	-0.0812541	-0.11598	-0.140029	-0.445353	-0.137856	-0.513189	-0.162445	-0.125908	-0.354021	0.0751117	0.423673	-0.0332595	-0.197494	-0.0197125	0.339572	-0.169479	-0.0257313	0.102398	0.216867	0.339766	0.118086	0.679607	-0.122614	0.198074	0.0502214	0.103025	0.353914	0.356244
ILMN_1655418	NM_001003962	calpain, small subunit 1 (CAPNS1), transcript variant 2, mRNA.	CAPNS1	0.00442909	-1.23303	0.135711		-0.0763345	0.158566	-0.048061	0.0237353	-0.367686	-0.0754623	-0.117281	-0.095424	-0.318082	-0.253379	-1.11153	0.0568695	-0.272213	0.159877	-0.220485	0.225643	0.172455	-0.102945	-0.0552571	-0.00515291	0.554231	0.260277	0.497409	0.172455	0.348615	0.355193	-0.0693193	0.0959186	0.164795	0.105838	-0.199133
ILMN_2048811	NM_025152	nucleotide binding protein-like (NUBPL), mRNA.	NUBPL	0.00261489	-1.23551	0.124049		0.368027	-0.0215347	-0.263609	-0.0699738	-0.0671835	-0.810873	-0.288081	-0.249102	0.0469617	0.194519	-0.671886	-0.192137	0.0841447	-0.27127	-0.0568276	0.180353	0.228637	0.303313	0.0867443	-0.220058	0.129962	0.512553	-0.000794807	-0.0651364	0.38791	-0.138491	0.170971	0.195	0.414157	0.137343	0.235088
ILMN_1742981	NM_006009	tubulin, alpha 1a (TUBA1A), mRNA.	TUBA1A	0.00467979	-1.23594	0.135711		0.346078	0.117593	-0.880726	-0.132516	0.0959859	-0.320671	-0.370768	-0.330237	-0.0935509	-0.534902	-0.471856	0.298394	0.0529135	0.150273	-0.166617	0.354828	0.329995	0.460552	0.0804789	0.235799	0.408335	0.263433	0.014249	0.0602249	0.0706366	-0.140084	0.436194	0.0267711	0.161537	0.0853664	-0.00485007
ILMN_2124386	NM_004761	ral guanine nucleotide dissociation stimulator-like 2 (RGL2), mRNA.	RGL2	0.0049809	-1.23647	0.135711		-0.117254	-0.383097	-0.671537	0.0851735	-0.0470415	0.0526066	-0.0163295	-0.313373	-0.199348	-0.502751	-0.217477	-0.236514	0.0624614	0.528292	-0.236514	-0.228534	-0.0813658	0.0957217	-0.0496863	-0.275593	0.0868197	-0.0189057	0.423144	0.401634	0.383269	0.377949	0.319652	0.414164	0.48251	0.336766	0.375082
ILMN_1758735	NM_144687	NLR family, pyrin domain containing 12 (NLRP12), transcript variant 2, mRNA.	NLRP12	0.00460206	-1.23661	0.135711		0.0010986	-0.449492	-0.656215	0.309971	-0.0719258	-0.336093	-0.161122	-0.385035	0.0137022	-0.387604	-0.404084	-0.0715546	0.11859	0.473094	-0.0878783	-0.0485045	0.111112	0.306234	-0.00765972	-0.230949	-0.0512557	-0.0637135	0.49773	0.112034	0.280865	0.509633	0.483692	0.20981	0.551952	0.113162	0.085763
ILMN_1663618	NM_213662	signal transducer and activator of transcription 3 (acute-phase response factor) (STAT3), transcript variant 3, mRNA.	STAT3	0.00543772	-1.23719	0.138191		0.32377	-0.126659	-0.705426	0.0936855	0.166626	-0.380535	-0.10651	-0.34482	-0.0830465	-0.730272	-0.643464	0.0324193	0.109063	0.157589	-0.0921882	0.105371	0.204319	0.385598	0.0898789	-0.266315	-0.21187	0.34308	0.54107	0.283242	-0.00921898	-0.0783338	0.29732	0.24259	0.247631	0.239902	0.181064
ILMN_2410986	NM_139276	signal transducer and activator of transcription 3 (acute-phase response factor) (STAT3), transcript variant 1, mRNA.	STAT3	0.00799761	-1.23791	0.148824		0.356706	0.0894749	-0.683694	0.181551	0.249758	-0.560461	0.0095024	-0.428965	-0.387792	-0.578406	-0.747388	0.122492	-0.0171748	0.283626	0.0672192	0.0818749	0.177281	0.416721	0.162125	-0.13826	-0.190932	0.235808	0.370455	0.561868	-0.00305927	0.00300341	0.275441	0.0867169	0.256293	0.137002	0.171674
ILMN_1804854	NM_001903	catenin (cadherin-associated protein), alpha 1, 102kDa (CTNNA1), mRNA.	CTNNA1	0.00796906	-1.23818	0.148824		0.0121721	-0.355272	-0.313215	0.0312712	-0.0614652	0.0284496	0.151959	0.0548097	-0.16573	-0.757298	-0.910813	-0.0758474	-0.4273	0.489496	0.0135447	0.0135447	-0.0301542	0.0770721	0.00292622	0.0640598	0.17895	0.293933	0.347017	0.491844	0.604839	-0.0341131	0.41105	-0.00673792	0.056172	0.288722	-0.324293
ILMN_1671891	NM_017933	phosphotyrosine interaction domain containing 1 (PID1), mRNA.	PID1	0.00459982	-1.2389	0.135711		-0.00497748	-0.0889964	-0.295764	-0.34373	-0.243317	-0.0283813	-0.0525414	-0.417447	0.231724	-0.228911	-0.159736	-0.388972	-0.0962703	-0.211719	-0.107416	0.315166	0.269339	0.237608	0.273292	0.42514	0.300739	-0.547074	0.518964	-0.0652033	-0.518722	0.278941	0.106418	-0.166791	0.211875	0.121378	0.772225
ILMN_3261938	XM_001717333	PREDICTED: similar to thymosin, beta 10 (LOC100130154), mRNA.	LOC100130154	0.000492355	-1.2408	0.0832933		-0.144893	-0.0428068	-0.324319	-0.166826	0.0396812	-0.0793603	-0.0327019	-0.102143	-0.206843	0.143029	-0.349246	-0.447719	-0.331395	-0.293526	0.0617649	0.173181	-0.16365	-0.264719	-0.0730749	0.0545556	0.397044	0.475581	-0.158271	-0.107349	0.228758	0.613495	-0.0175192	0.314153	0.379643	0.188131	0.349623
ILMN_1768773	NM_053046	egl nine homolog 2 (C. elegans) (EGLN2), transcript variant 1, mRNA.	EGLN2	0.00747867	-1.24292	0.146391		0.0775869	-0.375869	-0.501938	0.151986	-0.558447	0.143145	-0.131642	-0.315677	-0.120899	-0.495339	-0.308124	-0.159953	-0.214151	0.511921	-0.208127	-0.268175	-0.258129	0.254676	-0.0668578	-0.208276	0.075518	-0.0699673	0.678094	0.338051	0.56238	0.428331	0.376459	0.0815098	0.346109	0.445919	0.0361849
ILMN_3294134	XM_001720643	PREDICTED: similar to KIF27C (LOC389765), mRNA.	LOC389765	0.000867912	-1.24414	0.0955633		0.409574	-0.294107	-0.10434	-0.114726	-0.187152	-0.302341	-0.236089	-0.421348	-0.121564	0.103758	-0.306573	-0.488959	-0.293528	-0.0583572	0.0442175	-0.0552255	-0.0821116	0.171668	-0.315196	-0.0479194	0.111902	0.297181	0.102305	-0.211269	0.621184	0.129873	0.250335	0.387516	0.264552	0.452537	0.3026
ILMN_2075440	NR_002305	protein disulfide isomerase family A, member 3 pseudogene (PDIA3P), non-coding RNA.	PDIA3P	8.06883e-05	-1.24701	0.0419519		-0.0615008	0.222042	-0.188484	-0.117965	0.0475287	-0.208567	-0.0539029	-0.134871	-0.3315	-0.478558	-0.628487	-0.0650492	-0.458644	-0.163797	-0.00460059	0.195648	0.0204235	-0.060749	-0.112772	-0.00156953	0.0199448	0.104341	0.2804	0.342834	0.418932	0.0454117	0.32626	0.37528	0.0973147	0.0786283	0.104845
ILMN_1772492	NM_033412	mitochondrial carrier triple repeat 1 (MCART1), mRNA.	MCART1	0.00688657	-1.24741	0.142262		-0.00382821	-0.204015	0.0643042	-0.0404019	-0.0366605	-0.51707	-0.151342	-0.157271	-0.166698	0.139125	-0.907207	-0.354078	-0.160763	0.0411013	-0.0664865	-0.0473721	0.106944	0.437075	-0.364204	0.0293056	0.286484	-0.00486944	0.234134	-0.0221602	1.02915	-0.420421	0.253508	0.250314	0.0907537	0.260642	0.388182
ILMN_1736700	NM_184041	aldolase A, fructose-bisphosphate (ALDOA), transcript variant 2, mRNA.	ALDOA	0.00503824	-1.2475	0.135711		-0.0200772	-0.0867935	-0.386568	-0.115438	-0.0422377	-0.869576	-0.0686283	-0.308267	-0.0796202	-0.56426	-0.52825	0.216664	0.0985983	0.28192	-0.129678	-0.293877	0.545179	0.739447	0.12886	-0.0172464	0.176128	0.345888	0.331611	0.196302	-0.234166	0.0587822	0.0922022	0.276786	0.244326	-0.0761081	0.0368607
ILMN_1675844	NM_017491	WD repeat domain 1 (WDR1), transcript variant 1, mRNA.	WDR1	0.00050514	-1.25029	0.0832933		0.0329886	-0.264397	-0.376429	0.182462	-0.00696712	-0.525988	-0.139769	-0.140688	-0.110119	-0.458194	-0.679764	-0.109442	-0.0659315	0.24923	-0.275711	0.041109	0.140008	0.438457	0.0427129	-0.166328	0.16436	0.189979	0.297273	0.494946	0.0872781	0.0582036	0.361805	0.13141	0.195858	0.242406	0.104655
ILMN_3234436	XR_038720	PREDICTED: misc_RNA (LOC100132528), miscRNA.	LOC100132528	0.00202778	-1.25126	0.118502		-0.342245	0.323748	-0.168642	0.0213299	0.0918753	0.0153004	-0.409852	0.147575	-0.557638	-0.421255	-0.591778	-0.260959	-0.255498	-0.130517	-0.0806282	0.0868826	-0.182083	-0.44794	-0.063743	0.216075	-0.0141147	-0.0765749	0.267228	0.408002	0.353709	0.271153	0.263922	0.385176	0.114919	0.476355	0.436573
ILMN_1684051	NM_006990	WAS protein family, member 2 (WASF2), mRNA.	WASF2	0.00621814	-1.25135	0.140468		0.0156153	0.07368	-0.228843	0.0580309	-0.117905	-0.346877	-0.203625	-0.334006	-0.203625	-0.501146	-0.800319	0.0426714	-0.288279	0.523831	-0.0373896	0.20534	0.0631788	-0.0222453	-0.0371831	-0.326315	-0.0989273	0.261198	0.345969	0.120989	0.344873	0.732686	0.157531	0.229151	0.80067	0.200046	-0.246286
ILMN_1655821	NM_001747	capping protein (actin filament), gelsolin-like (CAPG), mRNA.	CAPG	0.00159551	-1.25168	0.115688		-0.24821	-0.196093	-0.464174	-0.0944485	-0.176848	-0.254611	-0.0129495	-0.0882174	-0.218534	-0.15756	-0.475754	-0.12517	-0.104131	0.262258	-0.238412	-0.340802	-0.0511163	-0.0706467	-0.0842629	-0.350404	0.372391	0.26363	0.171674	0.419671	0.38618	0.600475	0.138829	0.457792	0.535573	0.3998	0.0364477
ILMN_2113738	NM_173518	chromosome 8 open reading frame 45 (C8orf45), mRNA.	C8orf45	0.00290947	-1.25238	0.124909		0.248237	0.0529621	-0.0155926	0.0797234	-0.137442	-0.845975	-0.308695	0.180027	-0.144006	-0.0995618	-0.53327	-0.576069	-0.284765	-0.120688	0.165517	-0.024929	0.326663	0.378526	-0.0995618	-0.178137	0.342096	0.299558	0.180027	-0.0962898	0.368563	-0.392586	-0.0995618	0.350324	0.129449	0.372218	0.455602
ILMN_2091846	NR_002200	ferritin, heavy polypeptide-like 2 (FTHL2) on chromosome 1.	FTHL2	0.00234193	-1.25364	0.118516		0.160894	-0.289704	-0.510935	-0.285772	-0.118723	0.0387373	-0.255008	-0.185442	-0.0735812	-0.285515	-0.265133	-0.26993	-0.171258	0.144413	-0.229798	0.0609001	-0.137965	0.112415	0.340991	-0.0558004	0.0319636	0.218263	-0.193059	0.130653	-0.0596622	1.12929	-0.0078617	0.186017	0.544648	0.300535	0.298393
ILMN_1746171	NM_138609	H2A histone family, member Y (H2AFY), transcript variant 1, mRNA.	H2AFY	0.000419364	-1.25397	0.0830069		-0.118234	-0.290978	-0.649834	0.185886	-0.0764672	-0.115364	-0.343639	0.235636	-0.0900481	-0.785822	-0.194612	-0.336855	0.0198078	0.0307213	0.0247403	-0.10484	0.130828	0.12073	-0.0106618	0.150227	0.493133	-0.103148	0.138091	0.243139	0.0329608	0.338996	0.430278	0.155244	0.159634	0.157328	0.121932
ILMN_2327795	NM_012102	arginine-glutamic acid dipeptide (RE) repeats (RERE), transcript variant 1, mRNA.	RERE	0.00446476	-1.25473	0.135711		0.156733	-0.207825	-0.938224	0.171364	0.0203535	0.113813	-0.719583	-0.145761	-0.0411588	-0.493857	-0.387993	-0.0273231	-0.207143	0.419744	-0.0777763	-0.114319	0.0675628	0.425737	-0.161495	-0.22927	0.0832611	0.354921	0.189667	0.425737	0.12045	0.384049	0.33289	0.136912	0.255758	0.415944	0.178461
ILMN_1765222	NM_024537	cysteinyl-tRNA synthetase 2, mitochondrial (putative) (CARS2), nuclear gene encoding mitochondrial protein, mRNA.	CARS2	0.000683533	-1.25492	0.093072		0.0560486	-0.490116	-0.651392	-0.0555728	-0.119778	-0.0727773	0.0179202	-0.398956	-0.102586	-0.158206	-0.254145	-0.147424	-0.0933475	0.178748	-0.0320946	-0.166938	0.0540281	-0.0915881	-0.02583	-0.0123737	-0.121096	0.0462763	0.118335	0.127551	0.48763	0.639675	0.138697	0.427804	0.482883	0.510984	0.20254
ILMN_1654915	XM_929738	PREDICTED: similar to Afadin (AF-6 protein) (LOC646786), mRNA.	LOC646786	0.00327766	-1.25581	0.126303		0.0437006	-0.255525	-0.338861	-0.163149	0.072131	-0.413187	-0.49979	-0.371016	0.222844	-0.0198314	-0.47495	-0.133036	0.120799	0.00440193	-0.232654	0.129931	0.201471	-0.115777	0.222456	-0.0501858	-0.367976	0.315096	0.623786	0.10226	0.945692	0.105014	0.125467	0.57578	0.15104	0.130872	0.0461607
ILMN_3201221	XR_017616	PREDICTED: misc_RNA (LOC341315), miscRNA.	LOC341315	0.00429406	-1.25589	0.134718		0.256483	0.293807	-0.430771	-0.163731	0.0529493	-0.380582	-0.0817485	0.14987	-0.298874	-0.210318	-0.89649	-0.406164	-0.106747	-0.307692	0.258243	0.390372	-0.218857	-0.042116	-0.0721414	0.429181	0.374285	0.292561	-0.0102241	-0.342815	-0.0807529	0.287908	0.444606	0.0141374	0.0559327	0.701863	0.0336868
ILMN_2125675	NR_003277	heterogeneous nuclear ribonucleoprotein A1 pseudogene (LOC728643), non-coding RNA.	LOC728643	0.00195216	-1.25595	0.118303		-0.0917261	0.108635	-0.071641	0.070913	0.174219	0.123023	-0.278363	-0.029494	-0.370376	-0.416898	-0.683852	-0.509426	-0.309082	-0.257903	0.0977897	0.492731	-0.170918	-0.201927	-0.492008	0.245371	0.28608	-0.0910875	0.0582065	0.326474	0.181437	-0.0125906	0.379757	0.316881	0.385962	0.18587	0.514547
ILMN_1696066	NM_001014438	cysteinyl-tRNA synthetase (CARS), transcript variant 4, mRNA.	CARS	0.000403047	-1.25624	0.0830069		0.0922197	-0.126973	-0.508077	-0.108256	-0.164115	0.102718	-0.098694	-0.261772	-0.280931	-0.422941	-0.627885	-0.12403	-0.141115	0.31852	-0.246127	-0.080087	-0.15108	0.00898933	0.10176	-0.122826	0.201103	0.191981	0.324197	0.263264	0.163399	0.266627	0.459628	0.285095	0.338679	0.414719	0.320466
ILMN_1677906	XM_928075	PREDICTED: similar to prothymosin alpha, transcript variant 1 (LOC643287), mRNA.	LOC643287	0.0037673	-1.25714	0.131475		0.0349958	0.0390823	-0.0964705	-0.207655	-0.245506	-0.63922	-0.169864	0.162379	-0.170783	0.21253	-0.501537	-0.504293	-0.398801	-0.0432112	-0.124451	0.0409028	-0.0757945	-0.0692822	-0.369371	-0.166977	0.0917057	0.305907	0.123484	0.45424	0.783801	0.129091	0.505583	0.567199	0.0719758	0.449552	-0.175179
ILMN_2055700	NM_006527	stem-loop binding protein (SLBP), mRNA.	SLBP	0.00235158	-1.25742	0.118516		0.352662	-0.143685	-0.227249	-0.151432	0.252743	-0.046334	-0.0868933	0.122459	-0.428882	-0.887439	-0.0191705	-0.564897	-0.350885	-0.255077	0.0564571	-0.046334	-0.239779	0.185002	-0.0833855	0.0878068	0.300769	-0.223415	0.212047	0.0362472	0.181323	0.280405	0.369771	0.213097	0.514429	0.251872	0.565956
ILMN_1718565	NM_000076	cyclin-dependent kinase inhibitor 1C (p57, Kip2) (CDKN1C), mRNA.	CDKN1C	0.00499093	-1.25766	0.135711		0.334118	-0.501689	-0.452746	-0.147786	-0.302662	-0.186194	0.146519	-0.388228	-0.368715	-0.509926	-0.663791	0.320463	0.214684	-0.373706	-0.300075	0.237068	0.130802	0.166128	-0.346412	0.186029	0.458004	0.452062	0.71908	0.222543	-0.202758	0.0486159	-0.0260802	0.142342	0.280917	0.0544434	-0.0968835
ILMN_1811702	NM_002087	granulin (GRN), mRNA.	GRN	0.00216987	-1.26045	0.118516		0.197761	-0.144697	-0.580928	-0.114637	-0.0708663	-0.260141	-0.0462698	-0.178143	0.239007	-0.702468	-0.984873	-0.137486	0.0335306	0.26733	-0.134207	-0.0534709	0.495834	0.285818	0.098228	0.0906383	0.288339	0.10702	0.155233	0.277215	0.0673513	-0.0646182	0.101997	0.373037	0.215947	0.391096	-0.0333575
ILMN_1709101	NM_144767	A kinase (PRKA) anchor protein 13 (AKAP13), transcript variant 3, mRNA.	AKAP13	0.000153961	-1.26083	0.0574545		-0.168243	-0.457597	-0.214466	0.0541848	-0.216849	-0.36485	-0.0418104	-0.389034	-0.0491649	-0.120592	-0.539298	-0.19008	-0.0556152	0.226281	-0.141032	-0.0375724	0.244698	0.220267	-0.236982	0.0230571	-0.0585582	0.301648	0.369943	-0.0566724	0.562017	0.287482	0.321572	0.360482	0.0823367	0.303736	0.0691995
ILMN_1711493	NM_032152	PML-RARA regulated adaptor molecule 1 (PRAM1), mRNA.	PRAM1	0.00406027	-1.2645	0.13243		0.204361	-0.654548	-0.620314	0.00429519	-0.287118	-0.22912	-0.0785714	0.0569859	0.100243	-0.506729	-0.84554	0.021717	-0.0948112	0.347347	-0.110986	0.119009	0.502687	0.385682	-0.314507	-0.130806	0.524065	0.166001	0.249131	0.399452	-0.00367284	0.152472	-0.11755	-0.057816	0.427824	0.160131	0.269474
ILMN_3305169	XM_001719546	PREDICTED: hypothetical LOC728809 (LOC728809), mRNA.	LOC728809	0.00127101	-1.26539	0.108553		0.145715	-0.275229	-0.246524	-0.0955015	-0.194409	-0.842228	-0.162623	-0.106512	-0.122898	0.17958	-0.459319	-0.567142	-0.0125714	0.0920275	0.0798836	-0.0814017	-0.0125714	0.289895	-0.267152	-0.143523	0.261108	0.0835496	0.171202	0.300273	0.709437	-0.170807	0.153903	0.204387	0.15742	0.264476	0.533511
ILMN_2375141	NM_203441	chromosome 10 open reading frame 4 (C10orf4), transcript variant FRA10AC1-2, mRNA.	C10orf4	0.000315819	-1.26598	0.072806		-0.211042	-0.574291	-0.512218	-0.303979	-0.00108624	0.228588	-0.346265	-0.21614	-0.224803	-0.410775	-0.0345807	0.0463469	0.112454	0.233186	-0.122702	0.072402	-0.0622156	0.0544009	0.131782	0.042677	0.312147	0.397572	0.263246	-0.00999214	-0.0465145	0.423608	0.410572	0.0168927	0.468503	0.336503	0.406363
ILMN_1656042	NM_024874	KIAA0319-like (KIAA0319L), transcript variant 1, mRNA.	KIAA0319L	0.00620077	-1.26661	0.140468		-0.0348239	-0.412979	-0.437734	0.372311	-0.144541	-0.622177	-0.198381	-0.156516	0.137995	-0.67786	-0.384203	-0.257989	-0.0844424	0.472636	-0.161702	-0.0971175	0.356868	0.0789521	-0.273448	-0.256705	-0.0496593	0.0613735	0.239671	0.73755	0.273624	0.704303	0.213708	0.393639	0.491604	0.194629	-0.0598905
ILMN_3197767	XM_928701	PREDICTED: similar to heterogeneous nuclear ribonucleoprotein A1 (LOC645691), mRNA.	LOC645691	0.00118429	-1.26866	0.104962		0.113676	0.167376	-0.305847	-0.20373	0.263111	0.212997	-0.55802	-0.223667	-0.239269	-0.414963	-0.374519	-0.677901	-0.204106	-0.223498	0.33964	0.222551	-0.21078	0.000518803	-0.00803761	-0.0747609	0.0152582	-0.212618	-0.00618827	0.26719	0.359484	-0.136812	0.48881	0.281049	0.380024	0.338261	0.552513
ILMN_1793950	XM_926231	PREDICTED: prostate-specific P704P (P704P), mRNA.	P704P	3.82241e-06	-1.27026	0.0135511		-0.0438637	0.286899	-0.353579	-0.303529	0.0468791	-0.189001	-0.224928	-0.101347	-0.266967	-0.456712	-0.539261	-0.0327291	-0.163804	-0.264197	-0.00443486	0.0876679	0.170296	0.0481914	0.0114104	0.246968	0.389093	0.357297	0.200831	0.264891	-0.0316975	0.153087	0.257946	0.139344	0.222509	0.101804	0.0872655
ILMN_2355776	NM_014776	G protein-coupled receptor kinase interactor 2 (GIT2), transcript variant 3, mRNA.	GIT2	0.000443209	-1.2717	0.0832933		0.142816	-0.101755	-0.452632	-0.140836	0.149372	-0.176947	-0.431283	-0.044405	-0.135228	-0.809668	-0.469865	-0.240767	-0.202245	0.3852	-0.0380182	-0.0278664	-0.082651	0.217815	0.202922	-0.147185	0.114342	-0.048847	0.29068	0.404858	0.221108	0.32896	0.303764	0.320418	0.333256	0.0529549	0.378344
ILMN_2358980	NM_001014794	integrin-linked kinase (ILK), transcript variant 2, mRNA.	ILK	8.56875e-05	-1.27234	0.0419519		0.298602	0.159501	-0.141952	-0.130823	-0.0355267	-0.421684	-0.0094963	-0.194899	-0.286423	-0.368511	-0.505355	-0.355897	-0.505692	0.0303929	0.0793499	0.0889214	0.0615554	0.0413254	0.025589	0.208558	0.231231	0.198714	0.263081	0.171298	-0.282622	0.39631	0.467187	0.343752	0.332671	0.242399	0.0413254
ILMN_2072178	NM_024693	enoyl Coenzyme A hydratase domain containing 3 (ECHDC3), mRNA.	ECHDC3	0.00321279	-1.27303	0.125163		-0.104274	-0.673458	-0.565174	0.525933	0.169369	-0.163385	-0.716741	-0.179852	-0.176632	-0.539839	0.133889	-0.293128	0.0916645	-0.13908	-0.0789841	0.144247	0.47829	0.0488583	0.288856	-0.229194	0.039574	0.0320675	0.138929	0.133148	-0.204393	0.762547	0.337255	0.0850564	0.44943	0.0925669	0.207819
ILMN_2335704	NM_000631	neutrophil cytosolic factor 4, 40kDa (NCF4), transcript variant 1, mRNA.	NCF4	0.00624763	-1.27549	0.140468		0.21844	-0.5793	-0.967244	0.111983	-0.116587	0.179535	-0.0297799	-0.456938	-0.117165	-0.709843	-0.351752	0.066357	0.0519399	0.461481	-0.347168	-0.254989	0.472603	0.350686	0.00994537	-0.197887	0.124138	0.20049	0.235501	0.171358	0.238027	0.381615	0.397774	0.366184	0.573072	0.343207	0.184706
ILMN_1658121	NM_002621	complement factor properdin (CFP), mRNA.	CFP	0.000516192	-1.27606	0.0841373		0.229341	-0.207533	-0.618791	-0.0865893	-0.0235271	-0.0789446	-0.549445	-0.117229	-0.227559	-0.565486	-0.584372	0.138031	-0.233959	0.397977	-0.256426	0.105183	0.425136	0.104743	-0.0356166	0.113102	0.50768	0.163794	0.218823	0.228349	0.172172	0.367149	-0.00531624	0.209373	0.276207	0.203975	0.110614
ILMN_1690625	NM_015266	solute carrier family 9 (sodium/hydrogen exchanger), member 8 (SLC9A8), mRNA.	SLC9A8	0.00165611	-1.27632	0.115688		0.2784	-0.226228	-0.450488	0.0321091	-0.0771791	0.237514	-0.367351	-0.540773	-0.39252	-0.550172	-0.608125	-0.170727	-0.0608907	0.387336	-0.079386	-0.139099	-0.000894538	0.390628	-0.162756	-0.31854	0.0790249	0.230754	0.335666	0.341778	0.484698	0.206825	0.244065	0.329637	0.431626	0.154429	0.408532
ILMN_2353642	NM_001039457	ATPase, H+ transporting, lysosomal 21kDa, V0 subunit b (ATP6V0B), transcript variant 2, mRNA.	ATP6V0B	0.00266096	-1.27822	0.124049		-0.00934323	-0.122707	-0.877886	0.272315	-0.11451	0.0594436	-0.187693	-0.469914	-0.346413	-0.537077	0.297842	-0.390123	-0.167344	0.0412759	-0.164081	-0.146435	0.515672	0.121752	-0.155397	-0.199845	-0.0498375	0.205793	0.344116	0.368022	0.101764	0.70743	0.156223	0.0604533	0.55921	0.441338	0.0550547
ILMN_3191030	XR_037304	PREDICTED: misc_RNA (LOC100129960), miscRNA.	LOC100129960	0.00343524	-1.27858	0.127602		0.562725	-0.146862	-0.655095	-0.225897	0.303649	0.206875	-0.446459	-0.164747	-0.284469	-0.866408	0.262224	-0.542655	-0.238985	-0.24671	0.259865	0.216755	0.117152	0.130778	0.0388195	-0.0825324	0.145082	-0.205151	0.00731435	0.229575	0.162688	0.616851	0.250801	-0.0347668	0.547532	0.234005	0.377579
ILMN_1717234	NM_001042445	calpastatin (CAST), transcript variant 11, mRNA.	CAST	0.00227143	-1.27898	0.118516		-0.0729964	-0.152005	-0.271217	-0.283069	0.0813313	-0.0503501	-0.166515	-0.171631	-0.436545	-0.620251	-0.661552	0.0495837	-0.19127	0.206307	-0.24353	-0.120706	-0.0560906	-0.0167622	-0.0703847	-0.296996	0.267903	0.504416	0.579343	0.493625	0.402916	0.0517179	0.239523	-0.159857	0.413226	0.792882	-0.0736983
ILMN_1722622	NM_203416	CD163 molecule (CD163), transcript variant 2, mRNA.	CD163	0.00500158	-1.2792	0.135711		-0.546012	-0.956916	-0.818435	-0.149234	0.170102	-0.039689	0.0596192	0.015398	0.0521657	-0.0272306	-0.498592	-0.00802263	-0.159655	0.3843	-0.0881569	0.276519	0.420346	0.119585	-0.185409	0.0460996	0.341555	-0.0523586	0.662146	0.545455	-0.05268	0.133922	0.591636	-0.128138	-0.0829968	0.188331	0.24063
ILMN_1785785	NM_147223	nuclear receptor coactivator 1 (NCOA1), transcript variant 2, mRNA.	NCOA1	0.002045	-1.28054	0.118502		0.64792	-0.0528057	-0.62071	-0.29454	0.0668857	0.261858	-0.0543875	-0.177786	-0.416611	-0.581739	-0.976732	-0.209146	-0.15551	0.0421805	0.0196037	0.339279	0.190926	0.301025	0.0420509	-0.0521865	0.0948348	0.557828	-0.0197511	0.096138	0.174758	0.0852065	0.269342	0.326963	0.26579	0.19131	0.120332
ILMN_1760922	NM_014776	G protein-coupled receptor kinase interactor 2 (GIT2), transcript variant 3, mRNA.	GIT2	0.00292899	-1.2813	0.124909		-0.0187771	-0.278106	-0.439825	0.260541	0.0911842	-0.206528	-0.273576	-0.41426	-0.186546	-0.868952	-0.53468	-0.22507	-0.179397	0.598884	-0.220862	-0.0972024	-0.17307	0.316707	-0.0855192	-0.137041	0.130209	0.0428444	0.561167	0.501374	0.313446	0.315599	0.45174	0.222314	0.463975	-0.0194555	0.244694
ILMN_1737406	NM_001008490	Kruppel-like factor 6 (KLF6), transcript variant 1, mRNA.	KLF6	0.00305721	-1.28186	0.124909		-0.197989	-0.0143298	-0.386073	0.167565	-0.0930272	-0.636243	-0.310485	-0.267839	-0.0828912	-0.841227	-0.553278	0.14745	0.13573	0.455465	0.0218444	-0.150313	0.187084	0.38716	0.0265041	-0.547731	-0.0338056	0.44177	0.454756	0.185077	0.456606	0.274933	0.24596	0.294631	0.393804	0.354018	0.0896734
ILMN_2382657	NM_001080156	Rho GTPase activating protein 9 (ARHGAP9), transcript variant 3, mRNA.	ARHGAP9	0.0012908	-1.2828	0.108553		0.0970579	-0.703171	-0.567826	0.0562757	-0.107944	-0.41061	-0.177514	-0.0906095	-0.267866	-0.412429	-0.361019	-0.0842724	0.270992	0.35692	-0.00310587	0.00533252	0.0909504	0.620483	-0.0373161	-0.337509	0.287231	0.287832	0.581784	0.27254	0.329179	-0.140085	0.405704	-0.00310587	0.218105	0.182946	0.430314
ILMN_3179371	NM_031263	heterogeneous nuclear ribonucleoprotein K (HNRNPK), transcript variant 2, mRNA.	HNRNPK	0.00227744	-1.2831	0.118516		-0.122708	-0.0845022	-0.236534	0.304472	0.133621	-0.453543	-0.239896	-0.213825	-0.203573	-0.920472	-0.973376	-0.235447	-0.0215118	0.441905	0.0390172	0.226798	-0.0661071	0.256849	0.105559	-0.152478	-0.118415	-0.0292496	0.42802	0.473019	0.149285	0.106971	0.427924	0.137507	0.263328	0.240956	0.193989
ILMN_2109197	NM_012307	erythrocyte membrane protein band 4.1-like 3 (EPB41L3), mRNA.	EPB41L3	0.00132932	-1.28438	0.108553		0.0265483	0.212549	-0.544379	-0.336447	0.0856086	-0.0989297	-0.372714	-0.612632	-0.364851	-0.470458	-0.122537	-0.386633	0.195009	-0.082104	0.201488	0.0575737	0.11022	0.172598	-0.0550555	0.0913954	0.637361	0.0819981	-0.247415	0.137164	-0.264434	0.537386	0.452001	-0.198809	0.12291	0.080745	0.733665
ILMN_2338452	NM_001002236	serpin peptidase inhibitor, clade A (alpha-1 antiproteinase, antitrypsin), member 1 (SERPINA1), transcript variant 2, mRNA.	SERPINA1	0.00504303	-1.28861	0.135711		0.00132122	-0.128295	-0.803791	-0.292595	0.0332113	0.0837765	-0.315002	-0.247108	-0.0843623	-0.656679	-0.940347	0.301559	0.241823	0.155677	0.363242	0.0903223	0.294841	0.370485	-0.0804415	-0.0986587	0.39457	0.626231	0.795566	0.215433	-0.161346	-0.354831	0.195475	0.205744	-0.00106412	0.0318926	0.11251
ILMN_2352036	NM_020532	reticulon 4 (RTN4), transcript variant 1, mRNA.	RTN4	0.00244377	-1.2902	0.120328		0.557104	0.0834543	-0.61751	-0.380247	0.310397	0.394406	-0.249026	-0.208613	-0.309903	-0.619243	-0.190802	-0.630727	-0.438471	-0.31386	0.125072	0.302281	-0.25284	0.213923	-0.0492705	-0.0452566	0.45411	-0.0124906	-0.0576469	0.367806	0.0355275	0.388176	0.556517	0.0953231	0.361106	0.181462	0.412381
ILMN_1719988	NM_002108	histidine ammonia-lyase (HAL), mRNA.	HAL	0.00372699	-1.29228	0.131471		0.0776199	-0.386682	-0.870735	0.0249607	0.51356	0.353366	-0.47329	-0.401891	-0.24054	-0.960333	-0.188289	-0.330445	0.157463	0.26723	0.110029	0.0743527	0.293989	0.33669	0.13204	0.187214	0.262086	-0.0576731	-0.00220288	0.379173	-0.141528	0.533883	0.437797	0.152418	0.141256	0.0169751	0.447391
ILMN_2054554	NM_173666	DTW domain containing 2 (DTWD2), mRNA.	DTWD2	4.73426e-05	-1.2937	0.0419519		0.421711	0.095066	-0.0469733	-0.19334	-0.254978	-0.382706	-0.146529	-0.377008	-0.274948	-0.0767508	-0.577822	-0.279089	-0.380436	-0.258053	0.208678	0.28285	0.164555	0.0783594	0.040309	-0.205179	0.31736	0.31736	0.230241	-0.101953	0.491537	-0.13892	0.164555	0.257524	0.372561	0.331165	0.187209
ILMN_1724250	NM_002087	granulin (GRN), mRNA.	GRN	0.00633207	-1.29536	0.140741		-0.230712	-0.262179	-0.556463	-0.0206015	-0.0620655	-0.532643	0.00834055	-0.0678447	0.1413	-0.856372	-1.00398	-0.144778	0.161809	0.65157	-0.106767	-0.0104116	0.504058	0.173485	0.0953392	-0.207588	0.237323	-0.059097	0.208377	0.585654	0.427752	-0.140577	0.0947192	0.542878	0.488123	0.343807	-0.199303
ILMN_1772359	NM_006762	lysosomal multispanning membrane protein 5 (LAPTM5), mRNA.	LAPTM5	0.0016682	-1.29548	0.115962		-0.122508	-0.442916	-0.356938	0.187257	-0.261953	-0.108129	-0.20988	-0.0862658	-0.0785419	-0.348156	-0.672188	-0.338678	-0.328186	0.415655	-0.355075	-0.261516	0.0804154	0.0402792	-0.427462	-0.0592106	0.222435	0.0636256	0.540632	0.329329	0.661846	0.381976	0.384317	0.264595	0.313668	0.629566	0.198833
ILMN_2112417	NM_002629	phosphoglycerate mutase 1 (brain) (PGAM1), mRNA.	PGAM1	0.00163975	-1.29568	0.115688		0.0346009	-0.271707	-0.198611	0.185769	-0.0958764	-0.824219	-0.201417	-0.240983	-0.09645	-0.604718	-0.739551	-0.296998	0.00975449	0.574983	-0.0938036	0.0396081	-0.0515765	0.122814	0.264913	-0.325543	0.285385	-0.0938036	0.584821	0.443282	0.0784791	0.243335	0.407819	0.345341	0.30499	0.182634	0.256422
ILMN_2355225	NM_001013255	lymphocyte-specific protein 1 (LSP1), transcript variant 4, mRNA.	LSP1	0.000240799	-1.29789	0.0718438		0.0856873	-0.163912	-0.507283	0.247996	-0.0533415	-0.275252	-0.288901	-0.427296	0.238128	-0.361988	-0.873882	-0.299999	-0.21478	0.183039	-0.0997847	-0.129283	0.394851	0.261693	0.033651	0.0546268	0.154607	0.232236	0.0856873	0.479361	0.0755163	0.180676	0.127578	0.112385	0.388433	0.397609	0.352204
ILMN_1672661	NM_004510	SP110 nuclear body protein (SP110), transcript variant b, mRNA.	SP110	0.00524828	-1.29965	0.137314		0.491241	0.183453	-0.512221	0.260246	0.0727142	-0.779868	-0.356045	0.019657	-0.317933	-0.422645	-0.561144	-0.373062	-0.297387	-0.208403	0.177879	0.16539	0.26719	0.167147	-0.109991	-0.325863	-0.30439	0.412142	0.282541	0.50947	0.562449	-0.0120544	-0.149259	0.940763	0.0454719	0.513357	-0.115838
ILMN_3292224	XR_038433	PREDICTED: misc_RNA (LOC100131609), miscRNA.	LOC100131609	0.000413085	-1.30421	0.0830069		-0.0957512	0.151526	-0.375488	-0.0203887	0.163991	-0.136827	-0.36122	-0.0162222	-0.326295	-0.451137	-0.560342	-0.394947	-0.363738	-0.121285	-0.068685	0.152794	-0.381761	-0.259707	-0.0449662	0.245068	0.00733624	-0.237544	0.359325	0.386869	0.430018	0.0938547	0.488819	0.460778	0.373804	0.540637	0.43606
ILMN_2408543	NM_002659	plasminogen activator, urokinase receptor (PLAUR), transcript variant 1, mRNA.	PLAUR	0.00475449	-1.3052	0.135711		0.189817	-0.405676	-0.801483	0.146557	0.103368	-0.173589	-0.661777	-0.433852	0.150749	-0.724318	-0.611788	-0.165902	0.167284	0.348471	-0.206731	-0.154291	0.235764	0.203777	-0.0230692	-0.246	-0.0669247	0.0958545	0.356556	0.661369	-0.168831	0.766429	0.207812	0.212552	0.58353	0.289071	0.298224
ILMN_3257030	XR_016025	PREDICTED: misc_RNA (FTHL16), miscRNA.	FTHL16	0.000264887	-1.30572	0.0718438		0.00394668	-0.165624	-0.177306	-0.254593	-0.111046	-0.305694	-0.681634	-0.183766	-0.198703	-0.178293	-0.194426	-0.22589	-0.146882	-0.0618589	-0.203171	0.0299184	-0.149279	0.107367	-0.242441	-0.21096	0.3038	0.497251	0.121805	0.186958	0.15745	1.0049	0.387264	0.266411	0.530171	0.12976	0.125819
ILMN_1814315	NM_020524	pre-B-cell leukemia homeobox interacting protein 1 (PBXIP1), mRNA.	PBXIP1	0.00249793	-1.30802	0.122157		-0.246131	0.0897963	-0.490507	-0.0303388	-0.3858	-0.174349	-0.0719789	-0.326676	-0.162241	-0.497386	-0.71198	0.0611752	-0.301982	0.554161	-0.53019	-0.174845	0.0239119	0.437716	0.0830813	-0.34342	-0.00806008	0.583912	0.320961	0.594776	0.382702	0.0776095	0.245185	0.131976	0.501163	0.623909	0.363518
ILMN_1766487	NM_145256	leucine rich repeat containing 25 (LRRC25), mRNA.	LRRC25	0.00587427	-1.30861	0.13879		-0.0661579	-0.741037	-1.00663	0.164336	-0.309844	-0.479368	-0.532557	-0.0129434	0.087522	-0.554473	-0.40409	0.184198	0.203831	0.596173	-0.373945	-0.0593448	0.308162	0.072972	-0.211344	-0.0174712	0.320669	0.283951	0.146909	0.857909	0.272607	0.528864	0.237035	0.320669	0.276722	0.0143206	0.131734
ILMN_2313079	NM_033007	NLR family, pyrin domain containing 1 (NLRP1), transcript variant 4, mRNA.	NLRP1	0.000924178	-1.31004	0.0970775		-0.128539	-0.318686	-0.444802	0.187696	-0.27446	-0.323714	-0.242988	-0.304123	-0.280417	-0.543298	-0.334868	-0.297	-0.176858	0.529292	-0.162671	-0.222768	0.350941	0.360186	0.0172447	-0.373149	0.151815	-0.277869	0.335946	0.625893	0.49125	0.0306963	0.272083	0.367938	0.654261	0.351239	0.0648354
ILMN_2137789	NM_004235	Kruppel-like factor 4 (gut) (KLF4), mRNA.	KLF4	0.00163851	-1.31069	0.115688		-0.0913147	-0.490772	-0.881093	-0.256115	0.358871	0.183198	0.0273481	0.00231758	-0.32091	-0.764325	-0.0967014	-0.511254	-0.0477097	-0.0725171	0.041121	0.653888	0.0350738	0.0169502	-0.0268891	0.322538	0.470257	-0.074046	0.480149	0.163973	-0.43627	0.18043	0.53767	-0.0527615	0.378565	0.0638438	0.285574
ILMN_1795826	NM_004691	ATPase, H+ transporting, lysosomal 38kDa, V0 subunit d1 (ATP6V0D1), mRNA.	ATP6V0D1	0.00145393	-1.31216	0.112053		0.146161	-0.597196	-0.523052	0.16792	0.0418928	-0.106372	-0.162661	-0.281491	-0.185653	-0.634531	-0.865099	-0.166978	-0.260318	0.565521	-0.262646	-0.120693	0.148072	0.312878	-0.127606	-0.20724	0.198553	0.102949	0.518799	0.277292	0.447092	0.337188	0.289487	0.316966	0.556347	0.217347	0.183086
ILMN_1793859	NM_000690	aldehyde dehydrogenase 2 family (mitochondrial) (ALDH2), nuclear gene encoding mitochondrial protein, mRNA.	ALDH2	0.00358104	-1.31434	0.129842		-0.188756	0.224484	-0.921084	-0.707855	0.0696666	-0.0474053	-0.0564446	0.0943389	0.0415227	-0.508245	-1.04692	-0.273534	0.317887	0.0320228	-0.288636	0.345698	0.291628	0.352418	0.241021	-0.0786984	0.708808	0.197175	0.266359	0.14209	-0.111754	0.271911	0.386726	-0.290957	0.0211777	0.409929	0.23199
ILMN_3294222	XR_039018	PREDICTED: misc_RNA (LOC100132673), miscRNA.	LOC100132673	0.00473948	-1.31536	0.135711		-0.0936643	0.365965	-0.230528	-0.21768	-0.143886	0.198375	-0.44879	0.0621562	-0.353393	-0.0750955	-0.398783	-0.617185	-0.491002	-0.518903	-0.0615295	0.48182	-0.540911	-0.276725	0.00395742	0.360941	0.505128	0.322631	-0.449634	-0.289236	0.296076	0.192264	0.374419	0.198279	0.361909	0.99873	0.64753
ILMN_2404154	NM_001002235	serpin peptidase inhibitor, clade A (alpha-1 antiproteinase, antitrypsin), member 1 (SERPINA1), transcript variant 3, mRNA.	SERPINA1	0.00460657	-1.31538	0.135711		0.145811	0.0629047	-1.02004	-0.211294	0.150041	0.607461	-0.675517	-0.503542	-0.298276	-0.594231	-0.695799	-0.169811	-0.0732654	0.395102	0.213542	0.243175	0.286147	0.26644	-0.316129	-0.118362	0.271227	0.572648	0.59055	0.384891	0.0382833	-0.15294	0.27564	0.383741	-0.0308229	0.149242	0.168226
ILMN_1727689	NM_006291	tumor necrosis factor, alpha-induced protein 2 (TNFAIP2), mRNA.	TNFAIP2	0.00291528	-1.32188	0.124909		0.117558	-0.295501	-0.87742	-0.0788174	-0.0367658	0.101859	-0.45869	-0.271826	-0.133549	-0.680509	-0.255251	-0.547252	-0.0751779	0.534255	-0.142125	-0.22332	-0.0577888	0.375795	-0.286612	-0.146657	0.179772	0.129728	0.446336	0.722524	0.0686732	0.811526	0.216756	0.163171	0.67492	0.0601721	0.260425
ILMN_2400372	NM_001054	sulfotransferase family, cytosolic, 1A, phenol-preferring, member 2 (SULT1A2), transcript variant 1, mRNA.	SULT1A2	0.00608707	-1.32496	0.140468		-0.414881	0.0479186	-0.550388	-0.274958	-0.249785	-0.336269	-0.355579	0.0778686	-0.332385	-0.423843	-0.552871	-0.0109965	-0.483912	0.852395	-0.263228	-0.381566	0.677499	1.09628	-0.244634	-0.168557	0.228606	0.138891	0.327515	0.310569	0.347917	0.320056	-0.333839	0.355477	0.505616	0.0476275	0.284764
ILMN_1697925	NM_018690	apolipoprotein B48 receptor (APOB48R), mRNA.	APOB48R	0.00405252	-1.32528	0.13243		0.112427	-0.356365	-0.67274	-0.0534729	0.0258596	0.119354	-0.469691	-0.369722	0.114509	-0.847478	-0.845258	-0.361916	0.221775	0.467543	0.0633985	-0.118773	0.592375	0.861671	-0.159847	-0.0683788	0.0805322	0.442556	0.419347	0.576854	-0.102763	-0.102763	-0.0843156	0.252405	0.359667	-0.0428169	0.397985
ILMN_1706013	NR_002204	ferritin, heavy polypeptide-like 11 (FTHL11) on chromosome 8.	FTHL11	0.00322451	-1.32553	0.125276		0.719291	0.032988	-0.693103	-0.445269	-0.138981	0.0765088	0.031388	-0.395802	-0.215311	-0.404728	-0.601387	-0.2339	-0.343975	-0.312106	-0.137443	-0.0131051	-0.32014	0.0948224	0.347666	0.221115	0.498718	0.55529	0.0387885	-0.332439	0.00875796	0.968746	0.0243534	-0.0345031	0.453731	0.393239	0.593035
ILMN_1762861	NM_001098479	major histocompatibility complex, class I, F (HLA-F), transcript variant 1, mRNA.	HLA-F	0.00311408	-1.327	0.124909		-0.699415	0.227653	0.0661091	0.159505	-0.36834	-0.467527	-0.128561	-0.549089	-0.0595398	-0.381325	-0.293466	-0.382739	-0.373301	-0.000308552	-0.664089	-0.387897	0.257622	0.282042	-0.362516	-0.366833	0.280779	0.306999	0.182914	0.943213	0.365666	0.391687	0.505215	0.438133	0.177993	0.400971	0.240191
ILMN_1740015	NM_000591	CD14 molecule (CD14), transcript variant 1, mRNA.	CD14	0.00311121	-1.32894	0.124909		0.0844465	-0.515941	-0.921979	-0.141	-0.0646681	-0.26835	0.102538	-0.0853028	-0.183759	-0.661324	-1.01801	0.109005	0.13092	0.472296	-0.274009	0.0224099	0.637771	0.20524	-0.0790507	-0.152419	0.578313	0.408383	0.441728	0.506443	0.212591	-0.142505	0.494863	0.141887	0.104635	0.232819	0.03994
ILMN_3259146	XM_001726834	PREDICTED: similar to NPC-A-7 (LOC100129681), mRNA.	LOC100129681	0.00153487	-1.33287	0.115137		0.349534	-0.667762	-0.439748	-0.395063	-0.320823	0.267448	0.13659	0.0801026	-0.191176	-0.194381	-0.787697	-0.423179	-0.137614	-0.469627	0.197306	0.26696	0.261543	-0.382297	-0.266648	0.191753	0.283276	0.563364	-0.141867	0.243503	0.0951866	-0.086527	-0.0368823	0.712958	0.326995	0.81049	0.130263
ILMN_1657983	NM_018975	telomeric repeat binding factor 2, interacting protein (TERF2IP), mRNA.	TERF2IP	0.00387605	-1.33737	0.131475		-0.543235	-0.207419	0.0577861	0.214168	0.103794	-0.118899	-0.287866	-0.366559	-0.486966	-0.668748	-0.691426	-0.431147	-0.184818	0.463007	-0.267928	-0.169491	-0.419018	-0.174783	0.278189	-0.00188568	-0.110377	-0.288732	0.539707	0.594007	0.406652	0.99446	0.455074	0.276213	0.501144	0.498908	0.194593
ILMN_1791545	NM_015515	keratin 23 (histone deacetylase inducible) (KRT23), mRNA.	KRT23	0.00315519	-1.33933	0.124909		0.0878228	-0.19889	-0.884351	-0.114098	0.350017	-0.143732	-0.266951	-0.386584	0.340214	-1.0783	0.0369167	-0.604876	-0.20456	0.222167	0.401705	0.0067922	0.0713567	0.456878	0.0993264	0.340691	-0.290083	0.262958	0.295538	0.799974	-0.0894759	0.590076	-0.208813	0.539448	-0.104217	0.141885	0.396842
ILMN_2380605	NM_153050	myotubularin related protein 3 (MTMR3), transcript variant 1, mRNA.	MTMR3	0.00087339	-1.34474	0.0955633		0.0120751	-0.561776	-0.498676	-0.178897	-0.00914888	-0.0220487	-0.00724624	-0.347036	-0.254087	-0.923609	-0.749622	-0.127657	0.133086	0.429312	-0.0735548	-0.128989	0.356131	0.439947	-0.0248879	-0.340197	-0.0451929	0.0829447	0.552811	0.567308	0.00203661	0.258826	0.553215	0.180184	0.378646	0.242428	0.492085
ILMN_2041101	NR_001562	annexin A2 pseudogene 1 (ANXA2P1) on chromosome 4.	ANXA2P1	0.000561376	-1.3516	0.0848223		0.375502	0.451114	-0.434781	-0.459412	0.0730595	0.0730595	-0.15705	-0.106775	-0.449492	-0.303657	-0.663108	-0.598943	-0.337694	-0.673297	0.397043	0.60175	-0.0031165	0.0224689	-0.0523497	0.5736	0.673964	0.237534	0.0375723	0.136953	-0.050999	-0.0394117	-0.215834	0.165055	0.342695	0.279461	0.383238
ILMN_1794782	NM_016818	ATP-binding cassette, sub-family G (WHITE), member 1 (ABCG1), transcript variant 2, mRNA.	ABCG1	0.00600619	-1.36181	0.139626		0.595934	-0.304112	-0.572824	0.196591	0.0549534	0.48454	-0.688905	-0.020368	-0.202976	-0.790637	-0.544106	-0.0963857	-0.572141	-0.66478	-0.31229	0.114837	0.569189	0.357544	-0.0181315	0.221281	-0.539193	-0.38049	0.458831	0.953023	0.273482	0.050169	0.304657	0.749014	0.0912275	0.435051	0.450911
ILMN_1686981	NM_018837	sulfatase 2 (SULF2), transcript variant 1, mRNA.	SULF2	0.00150036	-1.36377	0.113776		0.0546439	-0.440994	-0.56404	-0.307512	0.60967	0.0531451	-0.475019	-0.219991	-0.129245	-1.09635	-0.353174	-0.524123	-0.0228694	0.282663	0.351145	0.515086	0.136627	0.190307	0.391169	-0.366859	0.161331	0.00270015	0.172555	0.0840112	-0.242693	0.368781	0.464377	-0.0492708	0.752531	0.623548	0.249308
ILMN_2384591	NM_016185	hematological and neurological expressed 1 (HN1), transcript variant 1, mRNA.	HN1	0.000370852	-1.36532	0.0809066		0.168665	-0.011871	-0.382241	-0.223589	0.136185	0.0269767	-0.289694	-0.136082	-0.380766	-1.00154	-0.588496	-0.510465	-0.396972	0.264318	-0.105042	-0.116769	0.083244	0.313091	-0.303713	-0.147387	-0.0491933	0.275518	0.639595	0.394303	0.070566	0.482639	0.441174	0.320258	0.437195	0.372005	0.491468
ILMN_1731048	NM_003263	toll-like receptor 1 (TLR1), mRNA.	TLR1	0.00415138	-1.37084	0.13306		1.03938	-0.883947	-0.959581	-0.235113	0.248506	0.337835	-0.311817	-0.405374	-0.410673	-0.455548	0.0884483	-0.391298	-0.486117	-0.30454	0.319719	0.397489	-0.249113	0.110384	0.100533	0.202003	0.56017	0.351455	-0.108621	-0.215291	-0.206166	0.489956	0.61381	0.300957	0.384949	0.266359	0.616985
ILMN_3297996	XR_015658	PREDICTED: misc_RNA (LOC728732), miscRNA.	LOC728732	5.0139e-05	-1.37113	0.0419519		-0.0175127	0.201256	-0.0655355	-0.165237	-0.0859546	0.161697	-0.866678	-0.21774	-0.707102	-0.342845	-0.543284	-0.453646	-0.280496	-0.120738	0.0321268	0.176508	-0.295258	-0.183926	0.0934642	0.166948	0.178695	0.0209328	0.310304	0.233886	0.351431	0.454621	0.311895	0.291309	0.306903	0.538203	0.498562
ILMN_2134453	NM_000570	Fc fragment of IgG, low affinity IIIb, receptor (CD16b) (FCGR3B), mRNA.	FCGR3B	0.00611562	-1.37423	0.140468		0.909074	0.00267417	-1.0847	-0.199345	0.643891	0.434792	-0.454587	-0.53068	-0.0945113	-0.730545	-0.340736	-0.642698	-0.189614	-0.715919	0.381861	0.488256	-0.365166	-0.122689	0.273458	-0.138276	0.0203652	0.455763	0.154291	0.418074	-0.0506421	0.358899	0.505701	0.55962	0.381618	0.307198	0.534031
ILMN_1662865	NM_018340	calcineurin-like phosphoesterase domain containing 1 (CPPED1), transcript variant 1, mRNA.	CPPED1	0.00135391	-1.37622	0.108553		0.612945	-0.351382	-1.06829	-0.246923	0.286388	-0.460985	-0.693432	-0.153049	-0.459296	-0.579001	0.0958023	-0.225286	-0.0991024	0.23057	-0.00341651	0.135635	-0.130787	0.523027	0.0342318	-0.34949	0.200583	0.321798	0.303857	0.423124	0.27148	0.457555	0.599347	-0.0900283	0.629737	0.151694	0.576126
ILMN_2320906	NM_006054	reticulon 3 (RTN3), transcript variant 1, mRNA.	RTN3	0.000415976	-1.38608	0.0830069		0.460455	-0.255478	-0.997131	-0.322806	0.239751	0.180424	-0.255051	-0.185731	-0.520834	-0.640007	-0.0820235	-0.432029	-0.155605	-0.223673	0.13524	-0.0288763	-0.090659	0.121123	0.25287	-0.0797186	0.231435	-0.0441759	0.178084	0.309892	-0.150929	0.686594	0.497351	0.447849	0.88506	0.381509	0.40129
ILMN_1715947	XR_018923	PREDICTED: similar to Heterogeneous nuclear ribonucleoprotein A1 (Helix-destabilizing protein) (Single-strand RNA-binding protein) (hnRNP core protein A1) (HDP) (LOC648210), mRNA.	LOC648210	6.23094e-05	-1.38899	0.0419519		-0.216306	0.144456	-0.152895	-0.146539	-0.120281	0.109337	-0.490399	-0.256385	-0.380628	-0.455527	-0.878443	-0.354864	-0.510658	-0.106981	0.047199	0.0782076	-0.254628	-0.252507	-0.126153	0.337813	0.109601	-0.0764938	0.446894	0.369139	0.582168	0.0182181	0.403737	0.411668	0.133641	0.487153	0.709177
ILMN_2329927	NM_016818	ATP-binding cassette, sub-family G (WHITE), member 1 (ABCG1), transcript variant 2, mRNA.	ABCG1	0.000809103	-1.39502	0.095484		0.270186	-0.322738	-0.479513	0.414187	-0.012302	0.0216101	-0.656893	-0.242919	-0.0977593	-0.968134	-0.54179	-0.0950247	-0.265315	-0.447859	-0.345083	0.0289925	0.680948	0.211885	-0.165678	0.106564	-0.2737	-0.239317	0.47873	0.839321	0.441097	0.215789	0.387769	0.447272	0.18828	0.531359	0.472511
ILMN_1714643	NM_004668	maltase-glucoamylase (alpha-glucosidase) (MGAM), mRNA.	MGAM	0.00345945	-1.39679	0.128087		0.347715	-0.353535	-1.09927	0.0312259	0.398759	0.0815408	-0.397118	-0.484786	-0.34947	-1.25799	-0.251524	-0.350972	0.229952	0.224248	-0.0385548	0.115289	-0.00657037	0.687751	0.413761	-0.125911	-0.136714	-0.080525	0.23063	0.691788	0.125086	0.137185	0.636553	0.233182	1.01131	-0.0312792	0.40928
ILMN_1696911	NR_002203	ferritin, heavy polypeptide-like 8 (FTHL8) on chromosome X.	FTHL8	0.00477284	-1.40159	0.135711		0.739721	0.20026	-0.9598	-0.657103	0.193032	0.198624	-0.340869	-0.167943	-0.369362	-0.594978	-0.359271	-0.152716	-0.45472	-0.747466	-0.141395	0.689409	-0.241669	0.179478	0.324281	0.516327	0.420419	0.808069	-0.235775	-0.375372	-0.40272	1.01987	0.107119	0.322396	0.604887	-0.0298953	0.497899
ILMN_1726342	NM_016293	bridging integrator 2 (BIN2), mRNA.	BIN2	1.32779e-05	-1.40562	0.0313816		-0.0724967	-0.212442	-0.302568	-0.159864	-0.0670171	-0.011298	-0.302725	-0.152482	-0.669209	-0.594329	-0.605851	-0.396824	-0.0581242	0.0396821	-0.0438369	-0.0569338	-0.185206	-0.00126858	-0.167003	-0.0673174	0.404922	0.21804	0.448214	0.171788	0.301121	0.277665	0.424657	0.458804	0.667266	0.610318	0.559714
ILMN_1814998	NM_001017421	actin-like protein (FKSG30), mRNA.	FKSG30	0.000323261	-1.41434	0.072806		0.284811	0.0322065	-0.489514	-0.0607931	0.0943548	-0.144164	-0.187191	-0.004948	-0.263712	-1.05289	-1.46061	-0.239355	-0.336703	-0.0422677	-0.0122421	0.0232527	0.284811	0.303893	-0.12289	0.265356	0.356056	0.110305	0.352077	0.630042	0.236216	0.0430678	0.39013	0.102342	0.190104	0.386244	0.263144
ILMN_3282587	XM_930111	PREDICTED: similar to H3 histone, family 3B (LOC644914), mRNA.	LOC644914	0.000308262	-1.41943	0.072806		0.852035	0.00605925	-1.02412	-0.390927	0.163399	-0.0373458	-0.437553	-0.24916	-0.294558	-0.578862	-0.11822	-0.483856	-0.433947	-0.392943	0.0954141	0.273203	-0.093404	0.0315854	-0.128396	0.163399	0.330088	0.602298	-0.0590177	0.1276	0.172794	0.584859	0.465687	0.26254	0.622736	0.514278	0.471744
ILMN_1704385	XM_937928	PREDICTED: similar to H3 histone, family 3B (LOC347376), mRNA.	LOC347376	8.87928e-05	-1.42096	0.0419519		0.463098	-0.298723	-0.915303	-0.408836	0.0641039	-0.404658	-0.0976755	-0.237135	-0.164993	-0.719496	0.101732	-0.423542	-0.162523	-0.179901	-0.083712	0.0871397	-0.030432	0.225968	0.138165	-0.0170747	0.315122	0.680737	0.0803016	-0.0792389	0.389462	0.520319	0.0735914	0.407033	0.422229	0.516593	0.861522
ILMN_2073235	NR_002205	ferritin, heavy polypeptide-like 12 (FTHL12) on chromosome 9.	FTHL12	5.2293e-05	-1.43777	0.0419519		0.429868	-0.0810711	-0.56412	-0.382545	-0.140806	0.0725183	-0.2458	-0.152144	-0.507183	-0.705485	-0.575167	-0.407302	-0.332027	-0.218908	-0.18897	0.00659747	-0.165647	0.345333	0.452097	0.320007	0.276779	0.3371	-0.0601877	0.309505	-0.0972581	1.1684	0.339572	0.243601	0.307653	0.307653	0.376276
ILMN_2059549	NM_003177	spleen tyrosine kinase (SYK), mRNA.	SYK	0.00139036	-1.43944	0.109535		0.121438	-0.671441	-0.713945	0.0710168	-0.216527	-0.619513	-0.489478	-0.177735	0.137055	-0.845746	-0.775148	-0.157169	-0.0236657	0.508687	-0.0898213	0.194898	0.891097	0.506683	-0.5442	-0.109835	0.0749235	0.186954	0.344064	0.561314	1.09215	-0.306253	0.236674	0.138334	0.498609	0.498609	0.0818251
ILMN_3217285	XR_037525	PREDICTED: misc_RNA (LOC389322), miscRNA.	LOC389322	3.67633e-06	-1.44288	0.0135511		0.278385	0.0825467	-0.416632	-0.202253	0.301082	-0.100368	-0.30343	-0.155557	-0.398895	-0.945036	-0.817713	-0.44395	-0.435784	-0.28935	0.174098	0.518592	0.052435	0.177789	0.165522	0.0881936	0.154249	0.425208	0.2299	0.376228	0.348078	0.275195	0.305768	0.0834128	0.354322	0.327466	0.26445
ILMN_2112580	NM_000569	Fc fragment of IgG, low affinity IIIa, receptor (CD16a) (FCGR3A), transcript variant 1, mRNA.	FCGR3A	0.000601329	-1.46365	0.0870127		0.747678	-0.784647	-0.972066	-0.192746	0.352379	0.231945	-0.676083	-0.552118	-0.194477	-0.673125	-0.392039	-0.435234	-0.128242	-0.179358	0.322388	0.113614	-0.250508	0.23424	-0.144301	-0.172302	0.226926	0.499826	0.454141	-0.0405457	-0.0261206	0.529066	0.320153	0.693621	0.547567	0.59893	0.763235
ILMN_2198408	NM_020194	mitochondrial fission factor (MFF), nuclear gene encoding mitochondrial protein, mRNA.	MFF	0.00659059	-1.49804	0.141258		-0.863804	0.432019	0.314752	-0.690664	-0.502586	-0.611657	0.838032	-0.69056	-0.905575	-0.0534946	-0.631127	-0.968251	-0.468844	0.184015	0.731763	0.534152	0.128322	-0.818957	0.260475	-0.882902	0.524083	0.29693	0.222079	1.03505	0.47555	0.492452	-0.610078	0.278408	0.331481	0.670016	0.636206
ILMN_1750278	NR_002205	ferritin, heavy polypeptide-like 12 (FTHL12) on chromosome 9.	FTHL12	8.14935e-05	-1.51072	0.0419519		0.364084	-0.0229476	-1.08564	-0.18129	-0.0561381	0.00320417	-0.529059	-0.333642	-0.425826	-0.480183	-0.490512	-0.32628	-0.585661	-0.143078	-0.189768	-0.149001	-0.13477	0.0777549	0.176878	0.273726	0.199006	0.710946	0.0684432	0.159871	-0.0275997	1.25749	0.570635	0.407653	0.623203	0.534612	0.347117
ILMN_1789074	NM_005345	heat shock 70kDa protein 1A (HSPA1A), mRNA.	HSPA1A	0.000894861	-1.54834	0.0955633		0.706463	-0.0188466	-1.0715	-0.221905	0.228303	0.183235	-0.349801	-0.167135	-0.576125	-1.29595	-1.56231	0.0973447	0.0715189	-0.378028	0.264937	0.475549	0.683197	0.573755	-0.275254	0.0146951	0.250857	0.521056	0.136039	0.561865	0.29838	-0.205862	0.248066	0.229203	0.594036	0.448354	0.615466
ILMN_2173835	NR_002201	ferritin, heavy polypeptide-like 3 (FTHL3), non-coding RNA.	FTHL3	6.11085e-05	-1.55039	0.0419519		0.246516	-0.0625005	-0.920432	-0.471474	-0.0531114	0.126353	-0.429615	-0.272507	-0.543169	-0.610699	-0.702038	-0.329857	-0.598908	0.0579354	-0.15761	0.11002	-0.333915	0.0193152	0.357427	-0.0217894	0.334055	0.50315	0.111723	0.191814	0.0619904	1.37644	0.538152	0.453134	0.803429	0.447476	0.418571
ILMN_1746525	NR_002200	ferritin, heavy polypeptide-like 2 (FTHL2) on chromosome 1.	FTHL2	8.70068e-05	-1.57098	0.0419519		0.0458521	-0.110525	-0.917605	-0.41809	0.0504382	-0.0114858	-0.176559	-0.458266	-0.633658	-0.751083	-0.494065	-0.122391	-0.560598	-0.169109	-0.377329	0.180619	-0.615606	0.0516109	0.233674	0.321467	0.348494	0.535825	0.245966	0.173174	0.0269076	1.47152	0.378696	0.411366	0.630286	0.76654	0.555019
ILMN_2134538	NR_002204	ferritin, heavy polypeptide-like 11 (FTHL11) on chromosome 8.	FTHL11	9.171e-05	-1.58718	0.0419519		0.161478	-0.0592883	-1.19641	-0.540553	-0.230425	0.0716337	-0.55046	-0.319857	-0.313243	-0.568852	-0.417809	-0.260932	-0.371005	-0.112901	-0.230425	0.0491873	-0.358471	-0.102534	0.268714	0.323843	0.234204	0.600032	0.080752	0.0964339	0.254901	1.63946	0.396231	0.401856	0.607081	0.841186	0.509853
ILMN_3227315	XR_042330	PREDICTED: misc_RNA (LOC729009), miscRNA.	LOC729009	0.000274851	-1.64396	0.0721772		0.751616	-0.118207	-1.09178	-0.707014	-0.154614	0.348754	-0.514255	-0.254739	-0.589697	-0.89341	-0.558178	-0.652254	-0.532517	-0.130821	-0.260877	0.237965	-0.368101	0.0178213	0.0845937	0.310364	0.436494	0.84037	0.0961923	0.150774	-0.155104	1.55962	0.380273	0.560311	0.865639	0.642331	0.603938
